# Supplementary material
Source: publisher figshare collection journal article supplement (https://tandf.figshare.com/articles/dataset/_/16529476)
Supplement: Supplementary file 1 [file 2]

**Search protocol for the National Clinical Guideline on difficult-to-treat depression. Primary literature.**

**Sources:**

| **DATABASE** | **INTERFACE** |
| --- | --- |
| **Medline** | PubMed |
| **Embase** | OVID |
| **PsycInfo** | OVID |
| **CINAHL** | EBSCO |
| **The Cochrane library** | https://www.cochranelibrary.com/advanced-search |

Refworks has been used for deduplication. Covidence has been used for screening the literature.

Note on PICO 1: at first, the search was not limited in regard to publication type or date. Then it was found that it was possible to include a systematic review, and therefore the search was run again, limited to randomized controlled trials published 2017-november 2019.

Note on PICO 4: at first, the search was limited to randomized controlled trials, but it was later expanded to all types of primary literature.

[PICO 1 (TMS) 3](#_Toc54357843)

[PubMed 3](#_Toc54357844)

[Embase 4](#_Toc54357845)

[PsycInfo 4](#_Toc54357846)

[CINAHL 5](#_Toc54357847)

[The Cochrane Library 7](#_Toc54357848)

[PubMed – update 7](#_Toc54357849)

[Embase – update 10](#_Toc54357850)

[PsycInfo – update 11](#_Toc54357851)

[CINAHL – update 12](#_Toc54357852)

[The Cochrane Library - update 14](#_Toc54357853)

[PICO 2 (ketamine) 15](#_Toc54357854)

[PubMed 15](#_Toc54357855)

[Embase 19](#_Toc54357856)

[PsycInfo 20](#_Toc54357857)

[CINAHL 21](#_Toc54357858)

[The Cochrane Library 25](#_Toc54357859)

[PICO 3 (light therapy) 26](#_Toc54357860)

[PubMed 26](#_Toc54357861)

[PubMed, expanded 28](#_Toc54357862)

[Embase 29](#_Toc54357863)

[Embase, expanded 30](#_Toc54357864)

[PsycInfo 31](#_Toc54357865)

[Psycinfo, expanded 32](#_Toc54357866)

[CINAHL 32](#_Toc54357867)

[CINAHL, expanded 34](#_Toc54357868)

[The Cochrane library 36](#_Toc54357869)

[PICO 4 (CBASP) 36](#_Toc54357870)

[PubMed 36](#_Toc54357871)

[Embase 37](#_Toc54357872)

[PsycInfo 38](#_Toc54357873)

[CINAHL 39](#_Toc54357874)

[The Cochrane Library 40](#_Toc54357875)

[PICO 5 (rumination) 41](#_Toc54357876)

[PubMed 41](#_Toc54357877)

[Embase 43](#_Toc54357878)

[PsycInfo 44](#_Toc54357879)

[CINAHL 45](#_Toc54357880)

[The Cochrane Library 49](#_Toc54357881)

[PICO 6 (cognitive remediation) 51](#_Toc54357882)

[PubMed 51](#_Toc54357883)

[Embase 52](#_Toc54357884)

[PsycInfo 53](#_Toc54357885)

[CINAHL 54](#_Toc54357886)

[The Cochrane Library 56](#_Toc54357887)

# PICO 1 (TMS)

## PubMed

Date of search: 17.09.2019

| **Query** | **Items found** |
| --- | --- |
| Search **(((((((("Transcranial Magnetic Stimulation") OR "Trans cranial Magnetic Stimulation") OR "tms") OR "rtms") OR "Transcranial Magnetic Stimulation"[Mesh])) AND (((((((mdd) OR depressive disorder*) OR "depression") OR affective disorder*) OR trd) OR "Mood Disorders"[Mesh]) OR "Depression"[Mesh]))) NOT ((((((("Systematic Review" [Publication Type]) OR "Meta-Analysis" [Publication Type])))) OR "Review" [Publication Type]) OR "Guideline" [Publication Type])** Filters: **Danish; English; Norwegian; Swedish** | [1790](https://www.ncbi.nlm.nih.gov/pubmed/?cmd=HistorySearch&querykey=56) |
| Search **(((((((("Transcranial Magnetic Stimulation") OR "Trans cranial Magnetic Stimulation") OR "tms") OR "rtms") OR "Transcranial Magnetic Stimulation"[Mesh])) AND (((((((mdd) OR depressive disorder*) OR "depression") OR affective disorder*) OR trd) OR "Mood Disorders"[Mesh]) OR "Depression"[Mesh]))) NOT ((((((("Systematic Review" [Publication Type]) OR "Meta-Analysis" [Publication Type])))) OR "Review" [Publication Type]) OR "Guideline" [Publication Type])** | [1863](https://www.ncbi.nlm.nih.gov/pubmed/?cmd=HistorySearch&querykey=45) |
| Search **(((((("Systematic Review" [Publication Type]) OR "Meta-Analysis" [Publication Type])))) OR "Review" [Publication Type]) OR "Guideline" [Publication Type]** | [2645511](https://www.ncbi.nlm.nih.gov/pubmed/?cmd=HistorySearch&querykey=44) |
| Search **(((((("Transcranial Magnetic Stimulation") OR "Trans cranial Magnetic Stimulation") OR "tms") OR "rtms") OR "Transcranial Magnetic Stimulation"[Mesh])) AND (((((((mdd) OR depressive disorder*) OR "depression") OR affective disorder*) OR trd) OR "Mood Disorders"[Mesh]) OR "Depression"[Mesh])** | [2512](https://www.ncbi.nlm.nih.gov/pubmed/?cmd=HistorySearch&querykey=43) |
| Search **(((("Transcranial Magnetic Stimulation") OR "Trans cranial Magnetic Stimulation") OR "tms") OR "rtms") OR "Transcranial Magnetic Stimulation"[Mesh]** | [20558](https://www.ncbi.nlm.nih.gov/pubmed/?cmd=HistorySearch&querykey=42) |
| Search **"Transcranial Magnetic Stimulation"[Mesh]** | [10650](https://www.ncbi.nlm.nih.gov/pubmed/?cmd=HistorySearch&querykey=41) |
| Search **"rtms"** | [4180](https://www.ncbi.nlm.nih.gov/pubmed/?cmd=HistorySearch&querykey=40) |
| Search **"tms"** | [11499](https://www.ncbi.nlm.nih.gov/pubmed/?cmd=HistorySearch&querykey=37) |
| Search **"Trans cranial Magnetic Stimulation"** | [36](https://www.ncbi.nlm.nih.gov/pubmed/?cmd=HistorySearch&querykey=36) |
| Search **"Transcranial Magnetic Stimulation"** | [15846](https://www.ncbi.nlm.nih.gov/pubmed/?cmd=HistorySearch&querykey=35) |
| Search **((((((mdd) OR depressive disorder*) OR "depression") OR affective disorder*) OR trd) OR "Mood Disorders"[Mesh]) OR "Depression"[Mesh]** | [434706](https://www.ncbi.nlm.nih.gov/pubmed/?cmd=HistorySearch&querykey=34) |
| Search **"Depression"[Mesh]** | [111602](https://www.ncbi.nlm.nih.gov/pubmed/?cmd=HistorySearch&querykey=33) |
| Search **"Mood Disorders"[Mesh]** | [117640](https://www.ncbi.nlm.nih.gov/pubmed/?cmd=HistorySearch&querykey=32) |
| Search **trd** | [1441](https://www.ncbi.nlm.nih.gov/pubmed/?cmd=HistorySearch&querykey=29) |
| Search **affective disorder*** | [19385](https://www.ncbi.nlm.nih.gov/pubmed/?cmd=HistorySearch&querykey=28) |
| Search **"depression"** | [382263](https://www.ncbi.nlm.nih.gov/pubmed/?cmd=HistorySearch&querykey=27) |
| Search **depressive disorder*** | [112178](https://www.ncbi.nlm.nih.gov/pubmed/?cmd=HistorySearch&querykey=26) |
| Search **mdd** | [12053](https://www.ncbi.nlm.nih.gov/pubmed/?cmd=HistorySearch&querykey=25) |

## Embase

Date of search: 17.09.2019

| **#** | **Searches** | **Results** |
| --- | --- | --- |
| 1 | mdd.mp. | 18219 |
| 2 | depressive disorder*.mp. | 50891 |
| 3 | depression.mp. | 641483 |
| 4 | affective disorder*.mp. | 24566 |
| 5 | trd.mp. | 2315 |
| 6 | exp mood disorder/ | 491121 |
| 7 | 1 or 2 or 3 or 4 or 5 or 6 | 721379 |
| 8 | Transcranial Magnetic Stimulation.mp. | 24801 |
| 9 | Trans cranial Magnetic Stimulation.mp. | 58 |
| 10 | tms.mp. | 17197 |
| 11 | rtms.mp. | 6839 |
| 12 | exp transcranial magnetic stimulation/ | 22899 |
| 13 | 8 or 9 or 10 or 11 or 12 | 31995 |
| 14 | 7 and 13 | 5495 |
| 15 | "systematic review"/ | 219858 |
| 16 | exp meta analysis/ | 172236 |
| 17 | exp "review"/ | 2527714 |
| 18 | exp practice guideline/ | 518661 |
| 19 | Conference Abstract.pt. | 3564048 |
| 20 | 15 or 16 or 17 or 18 or 19 | 6451948 |
| 21 | 14 not 20 | 2744 |
| 22 | limit 21 to (danish or english or norwegian or swedish) | 2563 |

## PsycInfo

Date of search: 17.09.2019

| **#** | **Searches** | **Results** |
| --- | --- | --- |
| 1 | mdd.mp. | 9864 |
| 2 | depressive disorder*.mp. | 74688 |
| 3 | depression.mp. | 314857 |
| 4 | affective disorder*.mp. | 33548 |
| 5 | trd.mp. | 695 |
| 6 | exp affective disorders/ | 136933 |
| 7 | "depression (emotion)"/ | 25075 |
| 8 | 1 or 2 or 3 or 4 or 5 or 6 or 7 | 342711 |
| 9 | Transcranial Magnetic Stimulation.mp. | 10373 |
| 10 | Trans cranial Magnetic Stimulation.mp. | 16 |
| 11 | tms.mp. | 5015 |
| 12 | rtms.mp. | 2895 |
| 13 | transcranial magnetic stimulation/ | 7900 |
| 14 | 9 or 10 or 11 or 12 or 13 | 11001 |
| 15 | 8 and 14 | 2317 |
| 16 | limit 15 to ("0800 literature review" or "0830 systematic review" or 1200 meta analysis) | 316 |
| 17 | treatment guidelines/ | 6521 |
| 18 | limit 15 to ("0200 book" or "0240 authored book" or "0280 edited book") | 113 |
| 19 | 16 or 17 or 18 | 6939 |
| 20 | 15 not 19 | 1884 |
| 21 | limit 20 to (danish or english or norwegian or swedish) | 1769 |

## CINAHL

Date of search: 17.09.2019

| **#** | **Query** | **Limiters/Expanders** | **Results** |
| --- | --- | --- | --- |
| S22 | S14 NOT S20 | Limiters - Language: Danish, English, Norwegian, Swedish  Expanders - Apply equivalent subjects  Search modes - Boolean/Phrase | 481 |
| S21 | S14 NOT S20 | Expanders - Apply equivalent subjects  Search modes - Boolean/Phrase | 483 |
| S20 | S15 OR S16 OR S17 OR S18 OR S19 | Expanders - Apply equivalent subjects  Search modes - Boolean/Phrase | 169,883 |
| S19 | S7 AND S13 | Limiters - Publication Type: Review  Expanders - Apply equivalent subjects  Search modes - Boolean/Phrase | 57 |
| S18 | (MH "Practice Guidelines") | Expanders - Apply equivalent subjects  Search modes - Boolean/Phrase | 69,382 |
| S17 | (MH "Literature Review+") | Expanders - Apply equivalent subjects  Search modes - Boolean/Phrase | 82,865 |
| S16 | (MH "Meta Analysis") | Expanders - Apply equivalent subjects  Search modes - Boolean/Phrase | 39,878 |
| S15 | (MH "Systematic Review") | Expanders - Apply equivalent subjects  Search modes - Boolean/Phrase | 73,399 |
| S14 | S7 AND S13 | Search modes - Boolean/Phrase | 578 |
| S13 | S8 OR S9 OR S10 OR S11 OR S12 | Search modes - Boolean/Phrase | 3,081 |
| S12 | (MH "Transcranial Magnetic Stimulation") | Search modes - Boolean/Phrase | 938 |
| S11 | rtms | Search modes - Boolean/Phrase | 945 |
| S10 | tms | Search modes - Boolean/Phrase | 1,039 |
| S9 | "Trans cranial Magnetic Stimulation" | Search modes - Boolean/Phrase | 7 |
| S8 | "Transcranial Magnetic Stimulation" | Search modes - Boolean/Phrase | 2,558 |
| S7 | S1 OR S2 OR S3 OR S4 OR S5 OR S6 | Search modes - Boolean/Phrase | 155,032 |
| S6 | (MH "Affective Disorders+") | Search modes - Boolean/Phrase | 105,170 |
| S5 | trd | Search modes - Boolean/Phrase | 269 |
| S4 | "affective disorder*" | Search modes - Boolean/Phrase | 9,246 |
| S3 | depression | Search modes - Boolean/Phrase | 147,187 |
| S2 | "depressive disorder*" | Search modes - Boolean/Phrase | 9,273 |
| S1 | mdd | Search modes - Boolean/Phrase | 3,175 |

## The Cochrane Library

Date of search: 17.09.2019


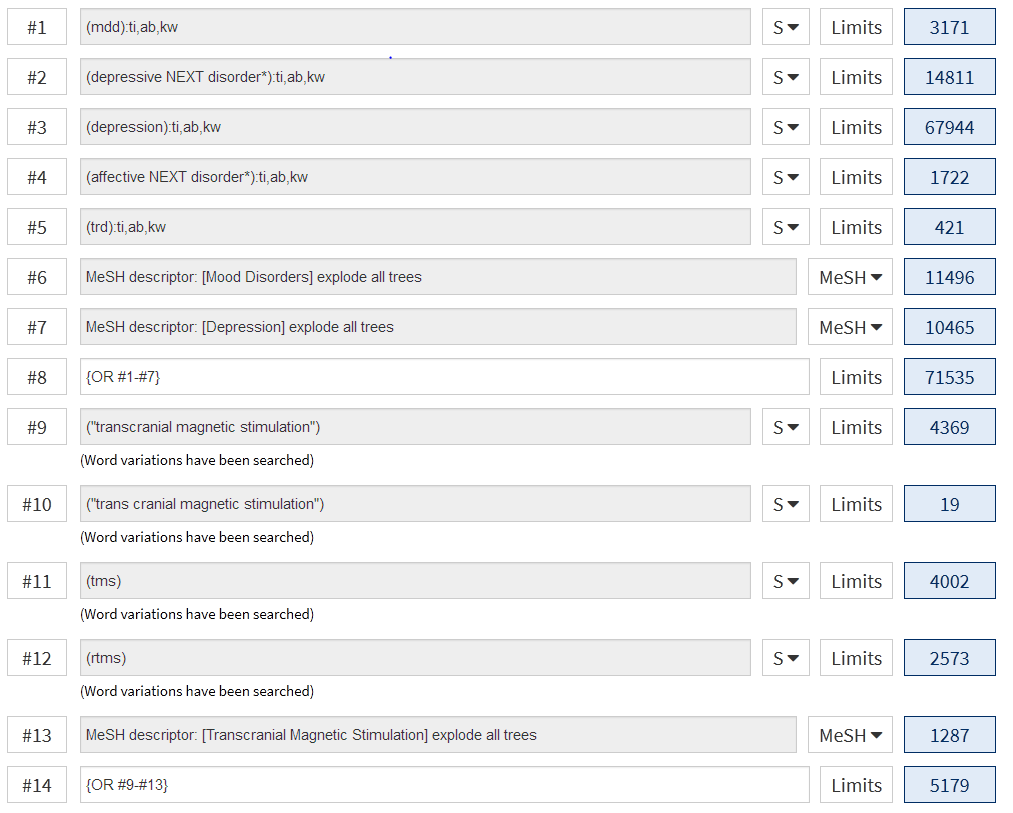


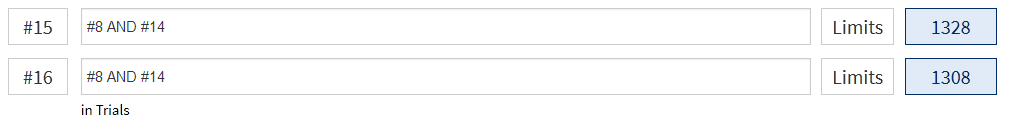


**References in total: 7911. After deduplication: 4324.**

## PubMed – update

Date of search: 06.11.2019

| **Query** | **Items found** |
| --- | --- |
| Search **(((((((("Controlled Clinical Trial" [Publication Type]) OR (((random*[tiab] or cluster-random*[tiab] or "controlled"[tiab] or "controled"[tiab] or "crossover"[tiab] or "cross over"[tiab] or blind*[tiab] or mask*[tiab]) AND (trial*[tiab] or "study"[tiab] or "studies"[tiab] or analyt*[tiab] or analys*[tiab])))) OR ((placebo*[tiab] or single blind*[tiab] or double blind*[tiab] or triple blind*[tiab]))) OR ((("single"[tiab] or "double"[tiab] or "triple"[tiab]) AND (blind*[tiab] or mask*[tiab])))) OR (("patient"[tiab] or "patients"[tiab] or person*[tiab] or participant*[tiab] or population*[tiab] or allocate*[tiab] or assign*[tiab]) AND (random*[tiab] or blind*[tiab] or mask*[tiab])))) AND ((((((("Transcranial Magnetic Stimulation") OR "Trans cranial Magnetic Stimulation") OR "tms") OR "rtms") OR "Transcranial Magnetic Stimulation"[Mesh])) AND (((((((mdd) OR depressive disorder*) OR "depression") OR affective disorder*) OR trd) OR "Mood Disorders"[Mesh]) OR "Depression"[Mesh])))) NOT ((("Guideline" [Publication Type] OR "Systematic Review" [Publication Type] OR "Meta-Analysis" [Publication Type] OR "Review" [Publication Type] OR study protocol*[title])))** Filters: **Publication date from 2017/01/01 to 2020/12/31; English; Danish; Norwegian; Swedish** | [151](https://www.ncbi.nlm.nih.gov/pubmed/?cmd=HistorySearch&querykey=39) |
| Search **(((((((("Controlled Clinical Trial" [Publication Type]) OR (((random*[tiab] or cluster-random*[tiab] or "controlled"[tiab] or "controled"[tiab] or "crossover"[tiab] or "cross over"[tiab] or blind*[tiab] or mask*[tiab]) AND (trial*[tiab] or "study"[tiab] or "studies"[tiab] or analyt*[tiab] or analys*[tiab])))) OR ((placebo*[tiab] or single blind*[tiab] or double blind*[tiab] or triple blind*[tiab]))) OR ((("single"[tiab] or "double"[tiab] or "triple"[tiab]) AND (blind*[tiab] or mask*[tiab])))) OR (("patient"[tiab] or "patients"[tiab] or person*[tiab] or participant*[tiab] or population*[tiab] or allocate*[tiab] or assign*[tiab]) AND (random*[tiab] or blind*[tiab] or mask*[tiab])))) AND ((((((("Transcranial Magnetic Stimulation") OR "Trans cranial Magnetic Stimulation") OR "tms") OR "rtms") OR "Transcranial Magnetic Stimulation"[Mesh])) AND (((((((mdd) OR depressive disorder*) OR "depression") OR affective disorder*) OR trd) OR "Mood Disorders"[Mesh]) OR "Depression"[Mesh])))) NOT ((("Guideline" [Publication Type] OR "Systematic Review" [Publication Type] OR "Meta-Analysis" [Publication Type] OR "Review" [Publication Type] OR study protocol*[title])))** Filters: **Publication date from 2017/01/01 to 2020/12/31** | [152](https://www.ncbi.nlm.nih.gov/pubmed/?cmd=HistorySearch&querykey=35) |
| Search **(((((((("Controlled Clinical Trial" [Publication Type]) OR (((random*[tiab] or cluster-random*[tiab] or "controlled"[tiab] or "controled"[tiab] or "crossover"[tiab] or "cross over"[tiab] or blind*[tiab] or mask*[tiab]) AND (trial*[tiab] or "study"[tiab] or "studies"[tiab] or analyt*[tiab] or analys*[tiab])))) OR ((placebo*[tiab] or single blind*[tiab] or double blind*[tiab] or triple blind*[tiab]))) OR ((("single"[tiab] or "double"[tiab] or "triple"[tiab]) AND (blind*[tiab] or mask*[tiab])))) OR (("patient"[tiab] or "patients"[tiab] or person*[tiab] or participant*[tiab] or population*[tiab] or allocate*[tiab] or assign*[tiab]) AND (random*[tiab] or blind*[tiab] or mask*[tiab])))) AND ((((((("Transcranial Magnetic Stimulation") OR "Trans cranial Magnetic Stimulation") OR "tms") OR "rtms") OR "Transcranial Magnetic Stimulation"[Mesh])) AND (((((((mdd) OR depressive disorder*) OR "depression") OR affective disorder*) OR trd) OR "Mood Disorders"[Mesh]) OR "Depression"[Mesh])))) NOT ((("Guideline" [Publication Type] OR "Systematic Review" [Publication Type] OR "Meta-Analysis" [Publication Type] OR "Review" [Publication Type] OR study protocol*[title])))** | [621](https://www.ncbi.nlm.nih.gov/pubmed/?cmd=HistorySearch&querykey=32) |
| Search **(("Guideline" [Publication Type] OR "Systematic Review" [Publication Type] OR "Meta-Analysis" [Publication Type] OR "Review" [Publication Type] OR study protocol*[title]))** | [2674502](https://www.ncbi.nlm.nih.gov/pubmed/?cmd=HistorySearch&querykey=31) |
| Search **(((((("Controlled Clinical Trial" [Publication Type]) OR (((random*[tiab] or cluster-random*[tiab] or "controlled"[tiab] or "controled"[tiab] or "crossover"[tiab] or "cross over"[tiab] or blind*[tiab] or mask*[tiab]) AND (trial*[tiab] or "study"[tiab] or "studies"[tiab] or analyt*[tiab] or analys*[tiab])))) OR ((placebo*[tiab] or single blind*[tiab] or double blind*[tiab] or triple blind*[tiab]))) OR ((("single"[tiab] or "double"[tiab] or "triple"[tiab]) AND (blind*[tiab] or mask*[tiab])))) OR (("patient"[tiab] or "patients"[tiab] or person*[tiab] or participant*[tiab] or population*[tiab] or allocate*[tiab] or assign*[tiab]) AND (random*[tiab] or blind*[tiab] or mask*[tiab])))) AND ((((((("Transcranial Magnetic Stimulation") OR "Trans cranial Magnetic Stimulation") OR "tms") OR "rtms") OR "Transcranial Magnetic Stimulation"[Mesh])) AND (((((((mdd) OR depressive disorder*) OR "depression") OR affective disorder*) OR trd) OR "Mood Disorders"[Mesh]) OR "Depression"[Mesh]))** | [823](https://www.ncbi.nlm.nih.gov/pubmed/?cmd=HistorySearch&querykey=30) |
| Search **(((("Controlled Clinical Trial" [Publication Type]) OR (((random*[tiab] or cluster-random*[tiab] or "controlled"[tiab] or "controled"[tiab] or "crossover"[tiab] or "cross over"[tiab] or blind*[tiab] or mask*[tiab]) AND (trial*[tiab] or "study"[tiab] or "studies"[tiab] or analyt*[tiab] or analys*[tiab])))) OR ((placebo*[tiab] or single blind*[tiab] or double blind*[tiab] or triple blind*[tiab]))) OR ((("single"[tiab] or "double"[tiab] or "triple"[tiab]) AND (blind*[tiab] or mask*[tiab])))) OR (("patient"[tiab] or "patients"[tiab] or person*[tiab] or participant*[tiab] or population*[tiab] or allocate*[tiab] or assign*[tiab]) AND (random*[tiab] or blind*[tiab] or mask*[tiab]))** | [1599753](https://www.ncbi.nlm.nih.gov/pubmed/?cmd=HistorySearch&querykey=29) |
| Search **("patient"[tiab] or "patients"[tiab] or person*[tiab] or participant*[tiab] or population*[tiab] or allocate*[tiab] or assign*[tiab]) AND (random*[tiab] or blind*[tiab] or mask*[tiab])** | [818080](https://www.ncbi.nlm.nih.gov/pubmed/?cmd=HistorySearch&querykey=28) |
| Search **(("single"[tiab] or "double"[tiab] or "triple"[tiab]) AND (blind*[tiab] or mask*[tiab]))** | [186393](https://www.ncbi.nlm.nih.gov/pubmed/?cmd=HistorySearch&querykey=27) |
| Search **(placebo*[tiab] or single blind*[tiab] or double blind*[tiab] or triple blind*[tiab])** | [273608](https://www.ncbi.nlm.nih.gov/pubmed/?cmd=HistorySearch&querykey=26) |
| Search **((random*[tiab] or cluster-random*[tiab] or "controlled"[tiab] or "controled"[tiab] or "crossover"[tiab] or "cross over"[tiab] or blind*[tiab] or mask*[tiab]) AND (trial*[tiab] or "study"[tiab] or "studies"[tiab] or analyt*[tiab] or analys*[tiab]))** | [1302300](https://www.ncbi.nlm.nih.gov/pubmed/?cmd=HistorySearch&querykey=25) |
| Search **"Controlled Clinical Trial" [Publication Type]** | [582406](https://www.ncbi.nlm.nih.gov/pubmed/?cmd=HistorySearch&querykey=24) |
| Search **(((((("Transcranial Magnetic Stimulation") OR "Trans cranial Magnetic Stimulation") OR "tms") OR "rtms") OR "Transcranial Magnetic Stimulation"[Mesh])) AND (((((((mdd) OR depressive disorder*) OR "depression") OR affective disorder*) OR trd) OR "Mood Disorders"[Mesh]) OR "Depression"[Mesh])** | [2546](https://www.ncbi.nlm.nih.gov/pubmed/?cmd=HistorySearch&querykey=23) |
| Search **(((("Transcranial Magnetic Stimulation") OR "Trans cranial Magnetic Stimulation") OR "tms") OR "rtms") OR "Transcranial Magnetic Stimulation"[Mesh]** | [20772](https://www.ncbi.nlm.nih.gov/pubmed/?cmd=HistorySearch&querykey=22) |
| Search **"Transcranial Magnetic Stimulation"[Mesh]** | [10774](https://www.ncbi.nlm.nih.gov/pubmed/?cmd=HistorySearch&querykey=21) |
| Search **"rtms"** | [4235](https://www.ncbi.nlm.nih.gov/pubmed/?cmd=HistorySearch&querykey=20) |
| Search **"tms"** | [11616](https://www.ncbi.nlm.nih.gov/pubmed/?cmd=HistorySearch&querykey=17) |
| Search **"Trans cranial Magnetic Stimulation"** | [36](https://www.ncbi.nlm.nih.gov/pubmed/?cmd=HistorySearch&querykey=16) |
| Search **"Transcranial Magnetic Stimulation"** | [16003](https://www.ncbi.nlm.nih.gov/pubmed/?cmd=HistorySearch&querykey=15) |
| Search **((((((mdd) OR depressive disorder*) OR "depression") OR affective disorder*) OR trd) OR "Mood Disorders"[Mesh]) OR "Depression"[Mesh]** | [437672](https://www.ncbi.nlm.nih.gov/pubmed/?cmd=HistorySearch&querykey=14) |
| Search **"Depression"[Mesh]** | [112753](https://www.ncbi.nlm.nih.gov/pubmed/?cmd=HistorySearch&querykey=13) |
| Search **"Mood Disorders"[Mesh]** | [118328](https://www.ncbi.nlm.nih.gov/pubmed/?cmd=HistorySearch&querykey=12) |
| Search **trd** | [1466](https://www.ncbi.nlm.nih.gov/pubmed/?cmd=HistorySearch&querykey=9) |
| Search **affective disorder*** | [19463](https://www.ncbi.nlm.nih.gov/pubmed/?cmd=HistorySearch&querykey=8) |
| Search **"depression"** | [384979](https://www.ncbi.nlm.nih.gov/pubmed/?cmd=HistorySearch&querykey=7) |
| Search **depressive disorder*** | [112858](https://www.ncbi.nlm.nih.gov/pubmed/?cmd=HistorySearch&querykey=6) |
| Search **mdd** | [12210](https://www.ncbi.nlm.nih.gov/pubmed/?cmd=HistorySearch&querykey=5) |

## Embase – update

Date of search: 06.11.2019

| **#** | **Searches** | **Results** |
| --- | --- | --- |
| 1 | mdd.mp. | 18590 |
| 2 | depressive disorder*.mp. | 51424 |
| 3 | depression.mp. | 644975 |
| 4 | affective disorder*.mp. | 24645 |
| 5 | trd.mp. | 2376 |
| 6 | exp mood disorder/ | 493552 |
| 7 | 1 or 2 or 3 or 4 or 5 or 6 | 725255 |
| 8 | Transcranial Magnetic Stimulation.mp. | 24948 |
| 9 | Trans cranial Magnetic Stimulation.mp. | 58 |
| 10 | tms.mp. | 17346 |
| 11 | rtms.mp. | 6922 |
| 12 | exp transcranial magnetic stimulation/ | 23033 |
| 13 | 8 or 9 or 10 or 11 or 12 | 32196 |
| 14 | 7 and 13 | 5547 |
| 15 | limit 14 to (randomized controlled trial or controlled clinical trial) | 689 |
| 16 | (((random* or cluster-random* or control?ed or crossover or cross-over or blind* or mask*) adj3 (trial*1 or study or studies or analy*)) or rct).ti,ab,kw. | 884558 |
| 17 | (placebo* or single-blind* or double-blind* or triple-blind*).ti,ab,kw. | 386674 |
| 18 | ((single or double or triple) adj2 (blind* or mask*)).ti,ab,kw. | 232846 |
| 19 | ((patient* or person* or participant* or population* or allocate* or assign*) adj3 (random* or blind* or mask*)).ti,ab,kw. | 345360 |
| 20 | 16 or 17 or 18 or 19 | 1170025 |
| 21 | 14 and 20 | 1363 |
| 22 | 15 or 21 | 1481 |
| 23 | "systematic review"/ | 223941 |
| 24 | exp meta analysis/ | 175377 |
| 25 | exp "review"/ | 2530721 |
| 26 | Conference Abstract.pt. | 3624797 |
| 27 | study protocol.ti. | 8920 |
| 28 | 23 or 24 or 25 or 26 or 27 | 6165938 |
| 29 | 22 not 28 | 675 |
| 30 | 22 not 29 | 806 |
| 31 | limit 30 to yr="2017 - 2020" | 305 |
| 32 | limit 31 to (danish or english or norwegian or swedish) | 304 |

## PsycInfo – update

Date of search: 06.11.2019

| **#** | **Searches** | **Results** |
| --- | --- | --- |
| 1 | mdd.mp. | 9995 |
| 2 | depressive disorder*.mp. | 75056 |
| 3 | depression.mp. | 317207 |
| 4 | affective disorder*.mp. | 33711 |
| 5 | trd.mp. | 703 |
| 6 | exp affective disorders/ | 138017 |
| 7 | "depression (emotion)"/ | 25164 |
| 8 | 1 or 2 or 3 or 4 or 5 or 6 or 7 | 345175 |
| 9 | Transcranial Magnetic Stimulation.mp. | 10468 |
| 10 | Trans cranial Magnetic Stimulation.mp. | 16 |
| 11 | tms.mp. | 5069 |
| 12 | rtms.mp. | 2932 |
| 13 | transcranial magnetic stimulation/ | 7986 |
| 14 | 9 or 10 or 11 or 12 or 13 | 11105 |
| 15 | 8 and 14 | 2352 |
| 16 | (((random* or cluster-random* or control?ed or crossover or cross-over or blind* or mask*) adj3 (trial*1 or study or studies or analy*)) or rct).ti,ab,id. | 94996 |
| 17 | (placebo* or single-blind* or double-blind* or triple-blind* or ((single or double or triple) adj2 (blind* or mask*))).ti,ab,id. | 47886 |
| 18 | ((patient* or person* or participant* or population* or allocate* or assign*) adj3 (random* or blind* or mask*)).ti,ab,id. | 56651 |
| 19 | 16 or 17 or 18 | 154207 |
| 20 | 15 and 19 | 750 |
| 21 | limit 20 to ("0200 book" or "0240 authored book" or "0280 edited book") | 10 |
| 22 | limit 20 to ("0800 literature review" or "0830 systematic review" or 1200 meta analysis) | 123 |
| 23 | study protocol.ti. | 470 |
| 24 | 21 or 22 or 23 | 601 |
| 25 | 20 not 24 | 618 |
| 26 | limit 25 to yr="2017 - 2020" | 118 |
| 27 | limit 26 to (danish or english or norwegian or swedish) | 107 |

## CINAHL – update

Date of search: 07.11.2019

| **#** | **Query** | **Limiters/Expanders** | **Results** |
| --- | --- | --- | --- |
| S30 | S20 NOT S27 | Limiters - Published Date: 20170101-20201231; Language: Danish, English, Norwegian, Swedish  Expanders - Apply equivalent subjects  Search modes - Boolean/Phrase | 51 |
| S29 | S20 NOT S27 | Limiters - Published Date: 20170101-20201231  Expanders - Apply equivalent subjects  Search modes - Boolean/Phrase | 52 |
| S28 | S20 NOT S27 | Expanders - Apply equivalent subjects  Search modes - Boolean/Phrase | 167 |
| S27 | S21 OR S22 OR S23 OR S24 OR S25 OR S26 | Expanders - Apply equivalent subjects  Search modes - Boolean/Phrase | 178,087 |
| S26 | S7 AND S13 | Limiters - Publication Type: Review  Expanders - Apply equivalent subjects  Search modes - Boolean/Phrase | 57 |
| S25 | TI "study protocol" | Expanders - Apply equivalent subjects  Search modes - Boolean/Phrase | 6,009 |
| S24 | (MH "Systematic Review") | Expanders - Apply equivalent subjects  Search modes - Boolean/Phrase | 74,272 |
| S23 | (MH "Meta Analysis") | Expanders - Apply equivalent subjects  Search modes - Boolean/Phrase | 40,796 |
| S22 | (MH "Literature Review+") | Expanders - Apply equivalent subjects  Search modes - Boolean/Phrase | 83,839 |
| S21 | (MH "Practice Guidelines") | Expanders - Apply equivalent subjects  Search modes - Boolean/Phrase | 70,074 |
| S20 | S14 AND S19 | Expanders - Apply equivalent subjects  Search modes - Boolean/Phrase | 221 |
| S19 | S15 OR S16 OR S17 OR S18 | Expanders - Apply equivalent subjects  Search modes - Boolean/Phrase | 462,562 |
| S18 | ((patient* or person* or participant* or population* or allocate* or assign*) N3 (random* or blind* or mask*)) | Expanders - Apply equivalent subjects  Search modes - Boolean/Phrase | 297,502 |
| S17 | (placebo* or single-blind* or double-blind* or triple-blind* or ((single or double or triple) N1 (blind* or mask*)) | Expanders - Apply equivalent subjects  Search modes - Boolean/Phrase | 97,802 |
| S16 | (((random* or cluster-random* or control#ed or crossover or cross-over or blind* or mask*) N3 (trial* or study or studies or analy*)) or rct) | Expanders - Apply equivalent subjects  Search modes - Boolean/Phrase | 438,541 |
| S15 | PT Randomized Controlled Trial | Expanders - Apply equivalent subjects  Search modes - Boolean/Phrase | 86,193 |
| S14 | S7 AND S13 | Search modes - Boolean/Phrase | 595 |
| S13 | S8 OR S9 OR S10 OR S11 OR S12 | Search modes - Boolean/Phrase | 3,133 |
| S12 | (MH "Transcranial Magnetic Stimulation") | Search modes - Boolean/Phrase | 958 |
| S11 | rtms | Search modes - Boolean/Phrase | 961 |
| S10 | tms | Search modes - Boolean/Phrase | 1,052 |
| S9 | "Trans cranial Magnetic Stimulation" | Search modes - Boolean/Phrase | 7 |
| S8 | "Transcranial Magnetic Stimulation" | Search modes - Boolean/Phrase | 2,608 |
| S7 | S1 OR S2 OR S3 OR S4 OR S5 OR S6 | Search modes - Boolean/Phrase | 156,804 |
| S6 | (MH "Affective Disorders+") | Search modes - Boolean/Phrase | 106,338 |
| S5 | trd | Search modes - Boolean/Phrase | 279 |
| S4 | "affective disorder*" | Search modes - Boolean/Phrase | 9,354 |
| S3 | depression | Search modes - Boolean/Phrase | 148,870 |
| S2 | "depressive disorder*" | Search modes - Boolean/Phrase | 9,402 |
| S1 | mdd | Search modes - Boolean/Phrase | 3,226 |

## The Cochrane Library - update

Date of search: 07.11.2019


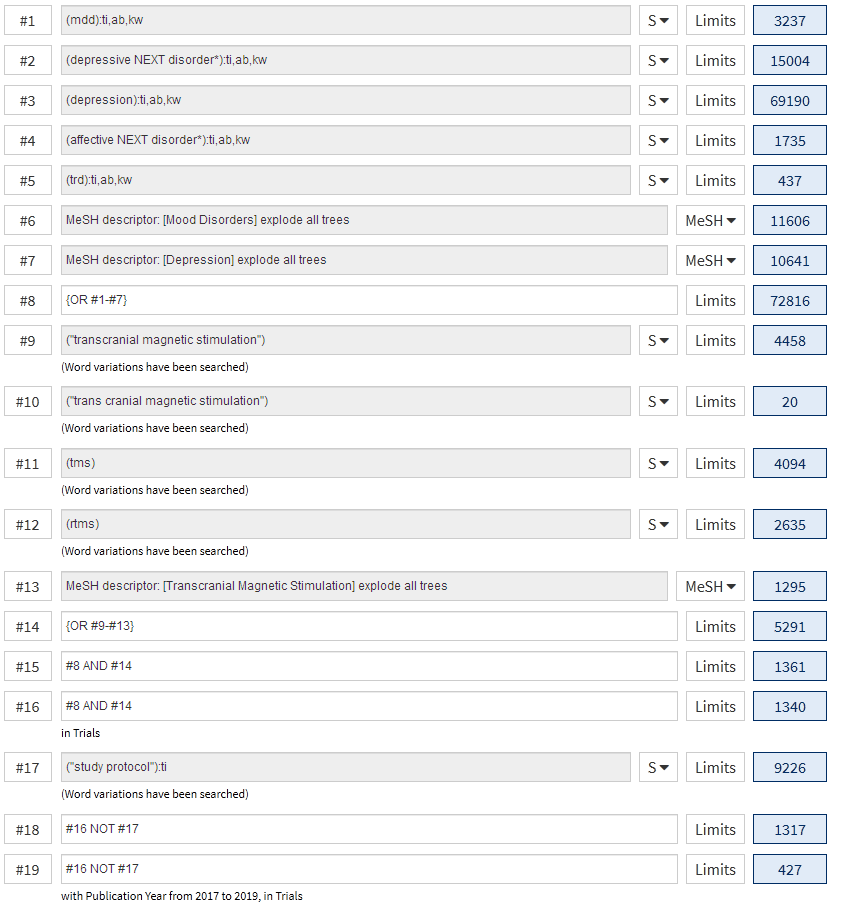


**References in total: 1040. After deduplication: 681.**

# PICO 2 (ketamine)

## PubMed

Date of search: 29.10.2019

| **Query** | **Items found** |
| --- | --- |
| Search **(((((((((("Controlled Clinical Trial" [Publication Type]) OR (((random*[tiab] or cluster-random*[tiab] or "controlled"[tiab] or "controled"[tiab] or "crossover"[tiab] or "cross over"[tiab] or blind*[tiab] or mask*[tiab]) AND (trial*[tiab] or "study"[tiab] or "studies"[tiab] or analyt*[tiab] or analys*[tiab])))) OR ((placebo*[tiab] or single blind*[tiab] or double blind*[tiab] or triple blind*[tiab]))) OR ((("single"[tiab] or "double"[tiab] or "triple"[tiab]) AND (blind*[tiab] or mask*[tiab])))) OR (("patient"[tiab] or "patients"[tiab] or person*[tiab] or participant*[tiab] or population*[tiab] or allocate*[tiab] or assign*[tiab]) AND (random*[tiab] or blind*[tiab] or mask*[tiab]))) OR (((("Comparative Study" [Publication Type]) OR "Evaluation Studies" [Publication Type]) OR "Multicenter Study" [Publication Type]) OR "Observational Study" [Publication Type])) OR (((cohort*[tiab] or "perspective"[tiab] or "prospective"[tiab] or longitud*[tiab] or "follow up"[tiab] or "followup"[tiab] or "observational"[tiab] or cross section*[tiab] or multi-cent*[tiab] or multicent*[tiab] or "evaluation"[tiab] or "comparative"[tiab] or "intervention"[tiab]) AND ("study"[tiab] or "studies"[tiab] or trial*[tiab] or analys*[tiab]))))) AND (((((((((mdd) OR depressive disorder*) OR "depression") OR affective disorder*) OR trd) OR "Mood Disorders"[Mesh]) OR "Depression"[Mesh])) AND ((((((((((((((("Ketamine") OR "esketamine") OR "NMDAR-antagonist") OR "NMDAR-antagonists") OR "NMDA-R antagonist") OR "NMDA-R antagonists") OR "NMDA-antagonist") OR "NMDA-antagonists") OR "N-methyl-d-aspartate antagonist") OR "N-methyl-d-aspartate antagonists") OR "N-methyl-d-aspartate receptor antagonist") OR "N-methyl-d-aspartate receptor antagonists") OR Arketamine) OR "Ketamine"[Mesh]) OR "Esketamine" [Supplementary Concept])))) NOT ((("Guideline" [Publication Type] OR "Systematic Review" [Publication Type] OR "Meta-Analysis" [Publication Type] OR "Review" [Publication Type] OR study protocol*[title])))** Filters: **English; Danish; Norwegian; Swedish** | [599](https://www.ncbi.nlm.nih.gov/pubmed/?cmd=HistorySearch&querykey=43) |
| Search **(((((((((("Controlled Clinical Trial" [Publication Type]) OR (((random*[tiab] or cluster-random*[tiab] or "controlled"[tiab] or "controled"[tiab] or "crossover"[tiab] or "cross over"[tiab] or blind*[tiab] or mask*[tiab]) AND (trial*[tiab] or "study"[tiab] or "studies"[tiab] or analyt*[tiab] or analys*[tiab])))) OR ((placebo*[tiab] or single blind*[tiab] or double blind*[tiab] or triple blind*[tiab]))) OR ((("single"[tiab] or "double"[tiab] or "triple"[tiab]) AND (blind*[tiab] or mask*[tiab])))) OR (("patient"[tiab] or "patients"[tiab] or person*[tiab] or participant*[tiab] or population*[tiab] or allocate*[tiab] or assign*[tiab]) AND (random*[tiab] or blind*[tiab] or mask*[tiab]))) OR (((("Comparative Study" [Publication Type]) OR "Evaluation Studies" [Publication Type]) OR "Multicenter Study" [Publication Type]) OR "Observational Study" [Publication Type])) OR (((cohort*[tiab] or "perspective"[tiab] or "prospective"[tiab] or longitud*[tiab] or "follow up"[tiab] or "followup"[tiab] or "observational"[tiab] or cross section*[tiab] or multi-cent*[tiab] or multicent*[tiab] or "evaluation"[tiab] or "comparative"[tiab] or "intervention"[tiab]) AND ("study"[tiab] or "studies"[tiab] or trial*[tiab] or analys*[tiab]))))) AND (((((((((mdd) OR depressive disorder*) OR "depression") OR affective disorder*) OR trd) OR "Mood Disorders"[Mesh]) OR "Depression"[Mesh])) AND ((((((((((((((("Ketamine") OR "esketamine") OR "NMDAR-antagonist") OR "NMDAR-antagonists") OR "NMDA-R antagonist") OR "NMDA-R antagonists") OR "NMDA-antagonist") OR "NMDA-antagonists") OR "N-methyl-d-aspartate antagonist") OR "N-methyl-d-aspartate antagonists") OR "N-methyl-d-aspartate receptor antagonist") OR "N-methyl-d-aspartate receptor antagonists") OR Arketamine) OR "Ketamine"[Mesh]) OR "Esketamine" [Supplementary Concept])))) NOT ((("Guideline" [Publication Type] OR "Systematic Review" [Publication Type] OR "Meta-Analysis" [Publication Type] OR "Review" [Publication Type] OR study protocol*[title])))** | [626](https://www.ncbi.nlm.nih.gov/pubmed/?cmd=HistorySearch&querykey=39) |
| Search **(("Guideline" [Publication Type] OR "Systematic Review" [Publication Type] OR "Meta-Analysis" [Publication Type] OR "Review" [Publication Type] OR study protocol*[title]))** | [2670956](https://www.ncbi.nlm.nih.gov/pubmed/?cmd=HistorySearch&querykey=38) |
| Search **(((((((("Controlled Clinical Trial" [Publication Type]) OR (((random*[tiab] or cluster-random*[tiab] or "controlled"[tiab] or "controled"[tiab] or "crossover"[tiab] or "cross over"[tiab] or blind*[tiab] or mask*[tiab]) AND (trial*[tiab] or "study"[tiab] or "studies"[tiab] or analyt*[tiab] or analys*[tiab])))) OR ((placebo*[tiab] or single blind*[tiab] or double blind*[tiab] or triple blind*[tiab]))) OR ((("single"[tiab] or "double"[tiab] or "triple"[tiab]) AND (blind*[tiab] or mask*[tiab])))) OR (("patient"[tiab] or "patients"[tiab] or person*[tiab] or participant*[tiab] or population*[tiab] or allocate*[tiab] or assign*[tiab]) AND (random*[tiab] or blind*[tiab] or mask*[tiab]))) OR (((("Comparative Study" [Publication Type]) OR "Evaluation Studies" [Publication Type]) OR "Multicenter Study" [Publication Type]) OR "Observational Study" [Publication Type])) OR (((cohort*[tiab] or "perspective"[tiab] or "prospective"[tiab] or longitud*[tiab] or "follow up"[tiab] or "followup"[tiab] or "observational"[tiab] or cross section*[tiab] or multi-cent*[tiab] or multicent*[tiab] or "evaluation"[tiab] or "comparative"[tiab] or "intervention"[tiab]) AND ("study"[tiab] or "studies"[tiab] or trial*[tiab] or analys*[tiab]))))) AND (((((((((mdd) OR depressive disorder*) OR "depression") OR affective disorder*) OR trd) OR "Mood Disorders"[Mesh]) OR "Depression"[Mesh])) AND ((((((((((((((("Ketamine") OR "esketamine") OR "NMDAR-antagonist") OR "NMDAR-antagonists") OR "NMDA-R antagonist") OR "NMDA-R antagonists") OR "NMDA-antagonist") OR "NMDA-antagonists") OR "N-methyl-d-aspartate antagonist") OR "N-methyl-d-aspartate antagonists") OR "N-methyl-d-aspartate receptor antagonist") OR "N-methyl-d-aspartate receptor antagonists") OR Arketamine) OR "Ketamine"[Mesh]) OR "Esketamine" [Supplementary Concept]))** | [752](https://www.ncbi.nlm.nih.gov/pubmed/?cmd=HistorySearch&querykey=36) |
| Search **(((((("Controlled Clinical Trial" [Publication Type]) OR (((random*[tiab] or cluster-random*[tiab] or "controlled"[tiab] or "controled"[tiab] or "crossover"[tiab] or "cross over"[tiab] or blind*[tiab] or mask*[tiab]) AND (trial*[tiab] or "study"[tiab] or "studies"[tiab] or analyt*[tiab] or analys*[tiab])))) OR ((placebo*[tiab] or single blind*[tiab] or double blind*[tiab] or triple blind*[tiab]))) OR ((("single"[tiab] or "double"[tiab] or "triple"[tiab]) AND (blind*[tiab] or mask*[tiab])))) OR (("patient"[tiab] or "patients"[tiab] or person*[tiab] or participant*[tiab] or population*[tiab] or allocate*[tiab] or assign*[tiab]) AND (random*[tiab] or blind*[tiab] or mask*[tiab]))) OR (((("Comparative Study" [Publication Type]) OR "Evaluation Studies" [Publication Type]) OR "Multicenter Study" [Publication Type]) OR "Observational Study" [Publication Type])) OR (((cohort*[tiab] or "perspective"[tiab] or "prospective"[tiab] or longitud*[tiab] or "follow up"[tiab] or "followup"[tiab] or "observational"[tiab] or cross section*[tiab] or multi-cent*[tiab] or multicent*[tiab] or "evaluation"[tiab] or "comparative"[tiab] or "intervention"[tiab]) AND ("study"[tiab] or "studies"[tiab] or trial*[tiab] or analys*[tiab])))** | [5455151](https://www.ncbi.nlm.nih.gov/pubmed/?cmd=HistorySearch&querykey=35) |
| Search **((cohort*[tiab] or "perspective"[tiab] or "prospective"[tiab] or longitud*[tiab] or "follow up"[tiab] or "followup"[tiab] or "observational"[tiab] or cross section*[tiab] or multi-cent*[tiab] or multicent*[tiab] or "evaluation"[tiab] or "comparative"[tiab] or "intervention"[tiab]) AND ("study"[tiab] or "studies"[tiab] or trial*[tiab] or analys*[tiab]))** | [2942559](https://www.ncbi.nlm.nih.gov/pubmed/?cmd=HistorySearch&querykey=34) |
| Search **((("Comparative Study" [Publication Type]) OR "Evaluation Studies" [Publication Type]) OR "Multicenter Study" [Publication Type]) OR "Observational Study" [Publication Type]** | [2286876](https://www.ncbi.nlm.nih.gov/pubmed/?cmd=HistorySearch&querykey=33) |
| Search **("patient"[tiab] or "patients"[tiab] or person*[tiab] or participant*[tiab] or population*[tiab] or allocate*[tiab] or assign*[tiab]) AND (random*[tiab] or blind*[tiab] or mask*[tiab])** | [816939](https://www.ncbi.nlm.nih.gov/pubmed/?cmd=HistorySearch&querykey=32) |
| Search **(("single"[tiab] or "double"[tiab] or "triple"[tiab]) AND (blind*[tiab] or mask*[tiab]))** | [186230](https://www.ncbi.nlm.nih.gov/pubmed/?cmd=HistorySearch&querykey=31) |
| Search **(placebo*[tiab] or single blind*[tiab] or double blind*[tiab] or triple blind*[tiab])** | [273365](https://www.ncbi.nlm.nih.gov/pubmed/?cmd=HistorySearch&querykey=30) |
| Search **((random*[tiab] or cluster-random*[tiab] or "controlled"[tiab] or "controled"[tiab] or "crossover"[tiab] or "cross over"[tiab] or blind*[tiab] or mask*[tiab]) AND (trial*[tiab] or "study"[tiab] or "studies"[tiab] or analyt*[tiab] or analys*[tiab]))** | [1300482](https://www.ncbi.nlm.nih.gov/pubmed/?cmd=HistorySearch&querykey=29) |
| Search **"Controlled Clinical Trial" [Publication Type]** | [581708](https://www.ncbi.nlm.nih.gov/pubmed/?cmd=HistorySearch&querykey=28) |
| Search **((((((((mdd) OR depressive disorder*) OR "depression") OR affective disorder*) OR trd) OR "Mood Disorders"[Mesh]) OR "Depression"[Mesh])) AND ((((((((((((((("Ketamine") OR "esketamine") OR "NMDAR-antagonist") OR "NMDAR-antagonists") OR "NMDA-R antagonist") OR "NMDA-R antagonists") OR "NMDA-antagonist") OR "NMDA-antagonists") OR "N-methyl-d-aspartate antagonist") OR "N-methyl-d-aspartate antagonists") OR "N-methyl-d-aspartate receptor antagonist") OR "N-methyl-d-aspartate receptor antagonists") OR Arketamine) OR "Ketamine"[Mesh]) OR "Esketamine" [Supplementary Concept])** | [2637](https://www.ncbi.nlm.nih.gov/pubmed/?cmd=HistorySearch&querykey=27) |
| Search **(((((((((((((("Ketamine") OR "esketamine") OR "NMDAR-antagonist") OR "NMDAR-antagonists") OR "NMDA-R antagonist") OR "NMDA-R antagonists") OR "NMDA-antagonist") OR "NMDA-antagonists") OR "N-methyl-d-aspartate antagonist") OR "N-methyl-d-aspartate antagonists") OR "N-methyl-d-aspartate receptor antagonist") OR "N-methyl-d-aspartate receptor antagonists") OR Arketamine) OR "Ketamine"[Mesh]) OR "Esketamine" [Supplementary Concept]** | [24925](https://www.ncbi.nlm.nih.gov/pubmed/?cmd=HistorySearch&querykey=26) |
| Search **"Esketamine" [Supplementary Concept]** | [9](https://www.ncbi.nlm.nih.gov/pubmed/?cmd=HistorySearch&querykey=25) |
| Search **"Ketamine"[Mesh]** | [11978](https://www.ncbi.nlm.nih.gov/pubmed/?cmd=HistorySearch&querykey=24) |
| Search **Arketamine** | [3](https://www.ncbi.nlm.nih.gov/pubmed/?cmd=HistorySearch&querykey=23) |
| Search **"N-methyl-d-aspartate receptor antagonists"** | [388](https://www.ncbi.nlm.nih.gov/pubmed/?cmd=HistorySearch&querykey=22) |
| Search **"N-methyl-d-aspartate receptor antagonist"** | [1155](https://www.ncbi.nlm.nih.gov/pubmed/?cmd=HistorySearch&querykey=21) |
| Search **"N-methyl-d-aspartate antagonists"** | [227](https://www.ncbi.nlm.nih.gov/pubmed/?cmd=HistorySearch&querykey=20) |
| Search **"N-methyl-d-aspartate antagonist"** | [475](https://www.ncbi.nlm.nih.gov/pubmed/?cmd=HistorySearch&querykey=19) |
| Search **"NMDA-antagonists"** | [1649](https://www.ncbi.nlm.nih.gov/pubmed/?cmd=HistorySearch&querykey=18) |
| Search **"NMDA-antagonist"** | [2732](https://www.ncbi.nlm.nih.gov/pubmed/?cmd=HistorySearch&querykey=17) |
| Search **"NMDA-R antagonists"** | [42](https://www.ncbi.nlm.nih.gov/pubmed/?cmd=HistorySearch&querykey=16) |
| Search **"NMDA-R antagonist"** | [56](https://www.ncbi.nlm.nih.gov/pubmed/?cmd=HistorySearch&querykey=15) |
| Search **"NMDAR-antagonists"** | [352](https://www.ncbi.nlm.nih.gov/pubmed/?cmd=HistorySearch&querykey=14) |
| Search **"NMDAR-antagonist"** | [676](https://www.ncbi.nlm.nih.gov/pubmed/?cmd=HistorySearch&querykey=13) |
| Search **"esketamine"** | [93](https://www.ncbi.nlm.nih.gov/pubmed/?cmd=HistorySearch&querykey=12) |
| Search **"Ketamine"** | [19163](https://www.ncbi.nlm.nih.gov/pubmed/?cmd=HistorySearch&querykey=11) |
| Search **((((((mdd) OR depressive disorder*) OR "depression") OR affective disorder*) OR trd) OR "Mood Disorders"[Mesh]) OR "Depression"[Mesh]** | [437218](https://www.ncbi.nlm.nih.gov/pubmed/?cmd=HistorySearch&querykey=10) |
| Search **"Depression"[Mesh]** | [112529](https://www.ncbi.nlm.nih.gov/pubmed/?cmd=HistorySearch&querykey=9) |
| Search **"Mood Disorders"[Mesh]** | [118192](https://www.ncbi.nlm.nih.gov/pubmed/?cmd=HistorySearch&querykey=8) |
| Search **trd** | [1460](https://www.ncbi.nlm.nih.gov/pubmed/?cmd=HistorySearch&querykey=5) |
| Search **affective disorder*** | [19448](https://www.ncbi.nlm.nih.gov/pubmed/?cmd=HistorySearch&querykey=4) |
| Search **"depression"** | [384569](https://www.ncbi.nlm.nih.gov/pubmed/?cmd=HistorySearch&querykey=3) |
| Search **depressive disorder*** | [112742](https://www.ncbi.nlm.nih.gov/pubmed/?cmd=HistorySearch&querykey=2) |
| Search **mdd** | [12187](https://www.ncbi.nlm.nih.gov/pubmed/?cmd=HistorySearch&querykey=1) |

## Embase

Date of search: 29.10.2019

| **#** | **Searches** | **Results** |
| --- | --- | --- |
| 1 | mdd.mp. | 18639 |
| 2 | depressive disorder*.mp. | 51551 |
| 3 | depression.mp. | 647596 |
| 4 | affective disorder*.mp. | 24747 |
| 5 | trd.mp. | 2360 |
| 6 | exp mood disorder/ | 496079 |
| 7 | 1 or 2 or 3 or 4 or 5 or 6 | 728311 |
| 8 | ketamine.mp. | 40756 |
| 9 | esketamine.mp. | 460 |
| 10 | NMDAR-antagonist.mp. | 927 |
| 11 | NMDAR-antagonists.mp. | 502 |
| 12 | NMDA-R antagonist.mp. | 97 |
| 13 | NMDA-R antagonists.mp. | 78 |
| 14 | NMDA-antagonist.mp. | 3469 |
| 15 | NMDA-antagonists.mp. | 2163 |
| 16 | ketamine/ | 37224 |
| 17 | esketamine/ | 450 |
| 18 | arketamine.mp. | 5 |
| 19 | n methyl dextro aspartic acid receptor blocking agent/ | 14109 |
| 20 | N-methyl-d-aspartate antagonist.mp. | 549 |
| 21 | N-methyl-d-aspartate antagonists.mp. | 278 |
| 22 | N-methyl-d-aspartate receptor antagonist.mp. | 1297 |
| 23 | N-methyl-d-aspartate receptor antagonists.mp. | 432 |
| 24 | 8 or 9 or 10 or 11 or 12 or 13 or 14 or 15 or 16 or 17 or 18 or 19 or 20 or 21 or 22 or 23 | 56375 |
| 25 | 7 and 24 | 7687 |
| 26 | limit 25 to (randomized controlled trial or controlled clinical trial) | 583 |
| 27 | (((random* or cluster-random* or control?ed or crossover or cross-over or blind* or mask*) adj3 (trial*1 or study or studies or analy*)) or rct).ti,ab,kw. | 887249 |
| 28 | (placebo* or single-blind* or double-blind* or triple-blind*).ti,ab,kw. | 388182 |
| 29 | ((single or double or triple) adj2 (blind* or mask*)).ti,ab,kw. | 233868 |
| 30 | ((patient* or person* or participant* or population* or allocate* or assign*) adj3 (random* or blind* or mask*)).ti,ab,kw. | 347142 |
| 31 | limit 25 to multicenter study | 52 |
| 32 | Observational study/ or Multicenter study/ or Evaluation study/ or exp comparative study/ or intervention study/ or exp longitudinal study/ or prospective study/ or Follow up/ or cohort analysis/ or cross-sectional study/ or crossover procedure/ or double blind procedure/ or single blind procedure/ | 4162155 |
| 33 | ((cohort* or perspective or prospective or longitud* or follow up or followup or observational or cross section* or multi cent* or multicent* or evaluation or comparative or intervention) adj3 (study or studies or trial*1 or analys*)).ti,ab,kw. | 1839258 |
| 34 | 27 or 28 or 29 or 30 or 32 or 33 | 5328790 |
| 35 | 25 and 34 | 1720 |
| 36 | 26 or 31 or 35 | 1784 |
| 37 | "systematic review"/ | 224562 |
| 38 | exp meta analysis/ | 175109 |
| 39 | Conference Abstract.pt. | 3626811 |
| 40 | exp "review"/ | 2541707 |
| 41 | exp practice guideline/ | 524364 |
| 42 | study protocol.ti. | 8910 |
| 43 | 37 or 38 or 39 or 40 or 41 or 42 | 6536004 |
| 44 | 36 not 43 | 967 |
| 45 | limit 44 to (danish or english or norwegian or swedish) | 925 |

## PsycInfo

Date of search: 29.10.2019

| **#** | **Searches** | **Results** |
| --- | --- | --- |
| 1 | mdd.mp. | 9971 |
| 2 | depressive disorder*.mp. | 74993 |
| 3 | depression.mp. | 316822 |
| 4 | affective disorder*.mp. | 33684 |
| 5 | trd.mp. | 699 |
| 6 | exp affective disorders/ | 137839 |
| 7 | "depression (emotion)"/ | 25145 |
| 8 | 1 or 2 or 3 or 4 or 5 or 6 or 7 | 344776 |
| 9 | ketamine.mp. | 3443 |
| 10 | esketamine.mp. | 28 |
| 11 | NMDAR-antagonist.mp. | 356 |
| 12 | NMDAR-antagonists.mp. | 192 |
| 13 | NMDA-R antagonist.mp. | 31 |
| 14 | NMDA-R antagonists.mp. | 27 |
| 15 | NMDA-antagonist.mp. | 1047 |
| 16 | NMDA-antagonists.mp. | 620 |
| 17 | arketamine.mp. | 2 |
| 18 | ketamine/ | 1932 |
| 19 | N-methyl-d-aspartate antagonist.mp. | 158 |
| 20 | N-methyl-d-aspartate antagonists.mp. | 97 |
| 21 | N-methyl-d-aspartate receptor antagonist.mp. | 343 |
| 22 | N-methyl-d-aspartate receptor antagonists.mp. | 146 |
| 23 | 9 or 10 or 11 or 12 or 13 or 14 or 15 or 16 or 17 or 18 or 19 or 20 or 21 or 22 | 5405 |
| 24 | 8 and 23 | 1267 |
| 25 | (((random* or cluster-random* or control?ed or crossover or cross-over or blind* or mask*) adj3 (trial*1 or study or studies or analy*)) or rct).ti,ab,id. | 94857 |
| 26 | (placebo* or single-blind* or double-blind* or triple-blind* or ((single or double or triple) adj2 (blind* or mask*))).ti,ab,id. | 47850 |
| 27 | ((patient* or person* or participant* or population* or allocate* or assign*) adj3 (random* or blind* or mask*)).ti,ab,id. | 56589 |
| 28 | limit 24 to ("0430 followup study" or "0450 longitudinal study" or "0451 prospective study") | 50 |
| 29 | exp Experimental design/ | 56230 |
| 30 | ((cohort* or perspective or prospective or longitud* or follow up or followup or observational or cross section* or multi-cent* or multicent* or evaluation or comparative or intervention) adj3 (study or studies or trial*1 or analys*)).ti,ab,id. | 231307 |
| 31 | 25 or 26 or 27 or 29 or 30 | 397185 |
| 32 | 24 and 31 | 293 |
| 33 | 28 or 32 | 314 |
| 34 | limit 33 to ("0200 book" or "0240 authored book" or "0280 edited book") | 8 |
| 35 | limit 33 to ("0830 systematic review" or 1200 meta analysis) | 27 |
| 36 | exp "literature review"/ | 22677 |
| 37 | treatment guidelines/ | 6573 |
| 38 | study protocol.ti. | 465 |
| 39 | 34 or 35 or 36 or 37 or 38 | 29731 |
| 40 | 33 not 39 | 278 |
| 41 | limit 40 to (danish or english or norwegian or swedish) | 259 |

## CINAHL

Date of search: 29.10.2019

| S41 | S32 NOT S39 | Limiters - Language: Danish, English, Norwegian, Swedish  Expanders - Apply equivalent subjects  Search modes - Boolean/Phrase | 185 |
| --- | --- | --- | --- |
| S40 | S32 NOT S39 | Expanders - Apply equivalent subjects  Search modes - Boolean/Phrase | 186 |
| S39 | S33 OR S34 OR S35 OR S36 OR S37 OR S38 | Expanders - Apply equivalent subjects  Search modes - Boolean/Phrase | 177,604 |
| S38 | (MH "Systematic Review") | Expanders - Apply equivalent subjects  Search modes - Boolean/Phrase | 74,056 |
| S37 | (MH "Meta Analysis") | Expanders - Apply equivalent subjects  Search modes - Boolean/Phrase | 40,650 |
| S36 | (MH "Literature Review+") | Expanders - Apply equivalent subjects  Search modes - Boolean/Phrase | 83,607 |
| S35 | (MH "Practice Guidelines") | Expanders - Apply equivalent subjects  Search modes - Boolean/Phrase | 69,967 |
| S34 | TI "study protocol" | Expanders - Apply equivalent subjects  Search modes - Boolean/Phrase | 5,990 |
| S33 | S23 AND S30 | Limiters - Publication Type: Review  Expanders - Apply equivalent subjects  Search modes - Boolean/Phrase | 9 |
| S32 | S23 AND S30 | Expanders - Apply equivalent subjects  Search modes - Boolean/Phrase | 212 |
| S31 | S23 AND S30 | Expanders - Apply equivalent subjects  Search modes - Boolean/Phrase | 212 |
| S30 | S24 OR S25 OR S26 OR S27 OR S28 OR S29 | Expanders - Apply equivalent subjects  Search modes - Boolean/Phrase | 1,646,190 |
| S29 | ((cohort* or perspective or prospective or longitud* or "follow up" or followup or observational or "cross section*" or "multi cent*" or multicent* or evaluation or comparative or intervention) N3 (study or studies or trial* or analys*))” | Expanders - Apply equivalent subjects  Search modes - Boolean/Phrase | 1,427,632 |
| S28 | MH ”Nonexperimental Studies+” | Expanders - Apply equivalent subjects  Search modes - Boolean/Phrase | 670,271 |
| S27 | ((patient* or person* or participant* or population* or allocate* or assign*) N3 (random* or blind* or mask*)) | Expanders - Apply equivalent subjects  Search modes - Boolean/Phrase | 296,677 |
| S26 | (placebo* or single-blind* or double-blind* or triple-blind* or ((single or double or triple) N1 (blind* or mask*)) | Expanders - Apply equivalent subjects  Search modes - Boolean/Phrase | 97,606 |
| S25 | (((random* or cluster-random* or control#ed or crossover or cross-over or blind* or mask*) N3 (trial* or study or studies or analy*)) or rct) | Expanders - Apply equivalent subjects  Search modes - Boolean/Phrase | 437,449 |
| S24 | PT Randomized Controlled Trial | Expanders - Apply equivalent subjects  Search modes - Boolean/Phrase | 86,192 |
| S23 | S7 AND S22 | Search modes - Boolean/Phrase | 611 |
| S22 | S8 OR S9 OR S10 OR S11 OR S12 OR S13 OR S14 OR S15 OR S16 OR S17 OR S18 OR S19 OR S20 OR S21 | Search modes - Boolean/Phrase | 4,377 |
| S21 | "N-methyl-d-aspartate receptor antagonists" | Search modes - Boolean/Phrase | 56 |
| S20 | "N-methyl-d-aspartate receptor antagonist" | Search modes - Boolean/Phrase | 137 |
| S19 | "N-methyl-d-aspartate antagonists" | Search modes - Boolean/Phrase | 22 |
| S18 | "N-methyl-d-aspartate antagonist" | Search modes - Boolean/Phrase | 50 |
| S17 | (MH "Ketamine") | Search modes - Boolean/Phrase | 2,924 |
| S16 | "NMDA-antagonists" | Search modes - Boolean/Phrase | 69 |
| S15 | "NMDA-antagonist" | Search modes - Boolean/Phrase | 104 |
| S14 | "NMDA-R antagonists" | Search modes - Boolean/Phrase | 4 |
| S13 | "NMDA-R antagonist" | Search modes - Boolean/Phrase | 4 |
| S12 | "NMDAR-antagonists" | Search modes - Boolean/Phrase | 22 |
| S11 | "NMDAR-antagonist" | Search modes - Boolean/Phrase | 44 |
| S10 | arketamine | Search modes - Boolean/Phrase | 1 |
| S9 | esketamine | Search modes - Boolean/Phrase | 55 |
| S8 | ketamine | Search modes - Boolean/Phrase | 4,036 |
| S7 | S1 OR S2 OR S3 OR S4 OR S5 OR S6 | Search modes - Boolean/Phrase | 156,451 |
| S6 | (MH "Affective Disorders+") | Search modes - Boolean/Phrase | 106,072 |
| S5 | trd | Search modes - Boolean/Phrase | 276 |
| S4 | "affective disorder*" | Search modes - Boolean/Phrase | 9,332 |
| S3 | depression | Search modes - Boolean/Phrase | 148,525 |
| S2 | "depressive disorder*" | Search modes - Boolean/Phrase | 9,368 |
| S1 | mdd | Search modes - Boolean/Phrase | 3,201 |

## The Cochrane Library

Date of search: 29.10.2019


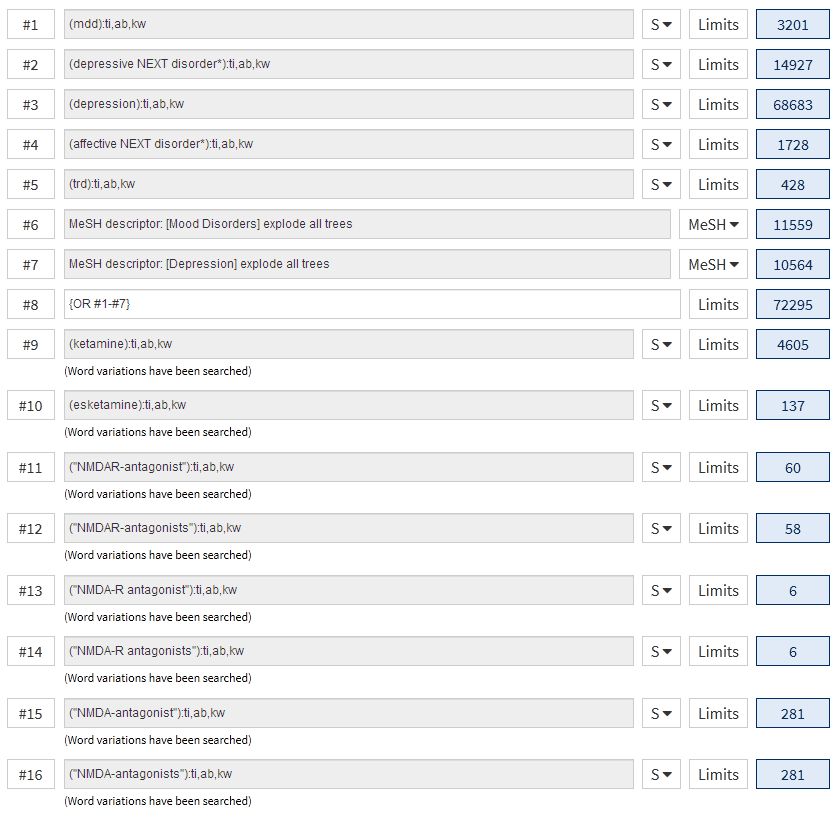


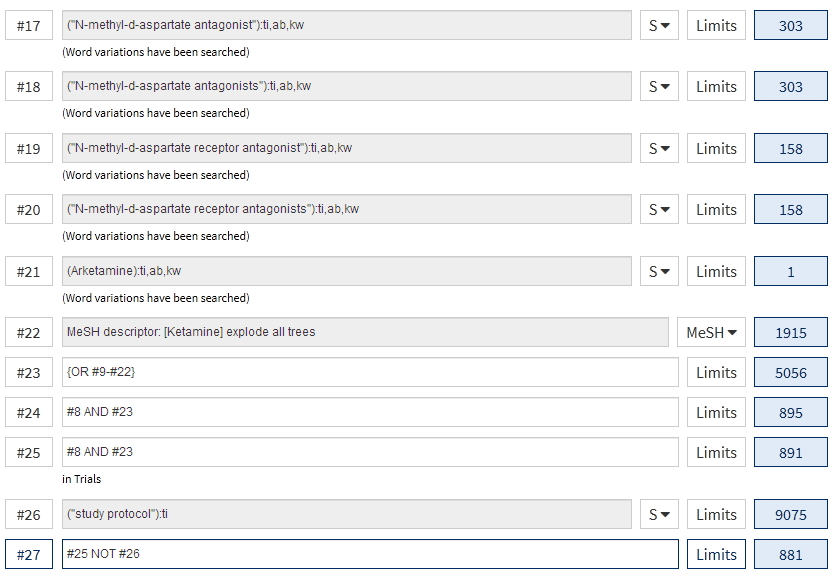


**References in total: 2849. After deduplication: 1813.**

# PICO 3 (light therapy)

## PubMed

Date of search: 10.09.2019

| **Query** | **Items found** |
| --- | --- |
| Search **(((((((("Controlled Clinical Trial" [Publication Type]) OR (((random*[tiab] or cluster-random*[tiab] or "controlled"[tiab] or "controled"[tiab] or "crossover"[tiab] or "cross over"[tiab] or blind*[tiab] or mask*[tiab]) AND (trial*[tiab] or "study"[tiab] or "studies"[tiab] or analyt*[tiab] or analys*[tiab])))) OR ((placebo*[tiab] or single blind*[tiab] or double blind*[tiab] or triple blind*[tiab]))) OR ((("single"[tiab] or "double"[tiab] or "triple"[tiab]) AND (blind*[tiab] or mask*[tiab])))) OR (("patient"[tiab] or "patients"[tiab] or person*[tiab] or participant*[tiab] or population*[tiab] or allocate*[tiab] or assign*[tiab]) AND (random*[tiab] or blind*[tiab] or mask*[tiab])))) AND ((((((("Phototherapy"[Mesh]) OR Light therap*) OR Light treatment*) OR phototherap*) OR photo therap*)) AND (((((((mdd) OR depressive disorder*) OR "depression") OR affective disorder*) OR trd) OR "Mood Disorders"[Mesh]) OR "Depression"[Mesh])))) NOT ((("Systematic Review" [Publication Type]) OR "Meta-Analysis" [Publication Type]))** Filters: **Danish; English; Norwegian; Swedish** | [402](https://www.ncbi.nlm.nih.gov/pubmed/?cmd=HistorySearch&querykey=60) |
| Search **(((((((("Controlled Clinical Trial" [Publication Type]) OR (((random*[tiab] or cluster-random*[tiab] or "controlled"[tiab] or "controled"[tiab] or "crossover"[tiab] or "cross over"[tiab] or blind*[tiab] or mask*[tiab]) AND (trial*[tiab] or "study"[tiab] or "studies"[tiab] or analyt*[tiab] or analys*[tiab])))) OR ((placebo*[tiab] or single blind*[tiab] or double blind*[tiab] or triple blind*[tiab]))) OR ((("single"[tiab] or "double"[tiab] or "triple"[tiab]) AND (blind*[tiab] or mask*[tiab])))) OR (("patient"[tiab] or "patients"[tiab] or person*[tiab] or participant*[tiab] or population*[tiab] or allocate*[tiab] or assign*[tiab]) AND (random*[tiab] or blind*[tiab] or mask*[tiab])))) AND ((((((("Phototherapy"[Mesh]) OR Light therap*) OR Light treatment*) OR phototherap*) OR photo therap*)) AND (((((((mdd) OR depressive disorder*) OR "depression") OR affective disorder*) OR trd) OR "Mood Disorders"[Mesh]) OR "Depression"[Mesh])))) NOT ((("Systematic Review" [Publication Type]) OR "Meta-Analysis" [Publication Type]))** | [419](https://www.ncbi.nlm.nih.gov/pubmed/?cmd=HistorySearch&querykey=55) |
| Search **(("Systematic Review" [Publication Type]) OR "Meta-Analysis" [Publication Type])** | [171213](https://www.ncbi.nlm.nih.gov/pubmed/?cmd=HistorySearch&querykey=54) |
| Search **(((((("Controlled Clinical Trial" [Publication Type]) OR (((random*[tiab] or cluster-random*[tiab] or "controlled"[tiab] or "controled"[tiab] or "crossover"[tiab] or "cross over"[tiab] or blind*[tiab] or mask*[tiab]) AND (trial*[tiab] or "study"[tiab] or "studies"[tiab] or analyt*[tiab] or analys*[tiab])))) OR ((placebo*[tiab] or single blind*[tiab] or double blind*[tiab] or triple blind*[tiab]))) OR ((("single"[tiab] or "double"[tiab] or "triple"[tiab]) AND (blind*[tiab] or mask*[tiab])))) OR (("patient"[tiab] or "patients"[tiab] or person*[tiab] or participant*[tiab] or population*[tiab] or allocate*[tiab] or assign*[tiab]) AND (random*[tiab] or blind*[tiab] or mask*[tiab])))) AND ((((((("Phototherapy"[Mesh]) OR Light therap*) OR Light treatment*) OR phototherap*) OR photo therap*)) AND (((((((mdd) OR depressive disorder*) OR "depression") OR affective disorder*) OR trd) OR "Mood Disorders"[Mesh]) OR "Depression"[Mesh]))** | [455](https://www.ncbi.nlm.nih.gov/pubmed/?cmd=HistorySearch&querykey=36) |
| Search **(((("Controlled Clinical Trial" [Publication Type]) OR (((random*[tiab] or cluster-random*[tiab] or "controlled"[tiab] or "controled"[tiab] or "crossover"[tiab] or "cross over"[tiab] or blind*[tiab] or mask*[tiab]) AND (trial*[tiab] or "study"[tiab] or "studies"[tiab] or analyt*[tiab] or analys*[tiab])))) OR ((placebo*[tiab] or single blind*[tiab] or double blind*[tiab] or triple blind*[tiab]))) OR ((("single"[tiab] or "double"[tiab] or "triple"[tiab]) AND (blind*[tiab] or mask*[tiab])))) OR (("patient"[tiab] or "patients"[tiab] or person*[tiab] or participant*[tiab] or population*[tiab] or allocate*[tiab] or assign*[tiab]) AND (random*[tiab] or blind*[tiab] or mask*[tiab]))** | [1585364](https://www.ncbi.nlm.nih.gov/pubmed/?cmd=HistorySearch&querykey=35) |
| Search **("patient"[tiab] or "patients"[tiab] or person*[tiab] or participant*[tiab] or population*[tiab] or allocate*[tiab] or assign*[tiab]) AND (random*[tiab] or blind*[tiab] or mask*[tiab])** | [809776](https://www.ncbi.nlm.nih.gov/pubmed/?cmd=HistorySearch&querykey=34) |
| Search **(("single"[tiab] or "double"[tiab] or "triple"[tiab]) AND (blind*[tiab] or mask*[tiab]))** | [185142](https://www.ncbi.nlm.nih.gov/pubmed/?cmd=HistorySearch&querykey=32) |
| Search **(placebo*[tiab] or single blind*[tiab] or double blind*[tiab] or triple blind*[tiab])** | [271749](https://www.ncbi.nlm.nih.gov/pubmed/?cmd=HistorySearch&querykey=31) |
| Search **((random*[tiab] or cluster-random*[tiab] or "controlled"[tiab] or "controled"[tiab] or "crossover"[tiab] or "cross over"[tiab] or blind*[tiab] or mask*[tiab]) AND (trial*[tiab] or "study"[tiab] or "studies"[tiab] or analyt*[tiab] or analys*[tiab]))** | [1289259](https://www.ncbi.nlm.nih.gov/pubmed/?cmd=HistorySearch&querykey=28) |
| Search **"Controlled Clinical Trial" [Publication Type]** | [578155](https://www.ncbi.nlm.nih.gov/pubmed/?cmd=HistorySearch&querykey=23) |
| Search **(((((("Phototherapy"[Mesh]) OR Light therap*) OR Light treatment*) OR phototherap*) OR photo therap*)) AND (((((((mdd) OR depressive disorder*) OR "depression") OR affective disorder*) OR trd) OR "Mood Disorders"[Mesh]) OR "Depression"[Mesh])** | [1493](https://www.ncbi.nlm.nih.gov/pubmed/?cmd=HistorySearch&querykey=17) |
| Search **(((("Phototherapy"[Mesh]) OR Light therap*) OR Light treatment*) OR phototherap*) OR photo therap*** | [45568](https://www.ncbi.nlm.nih.gov/pubmed/?cmd=HistorySearch&querykey=16) |
| Search **photo therap*** | [89](https://www.ncbi.nlm.nih.gov/pubmed/?cmd=HistorySearch&querykey=15) |
| Search **phototherap*** | [14142](https://www.ncbi.nlm.nih.gov/pubmed/?cmd=HistorySearch&querykey=14) |
| Search **Light treatment*** | [2440](https://www.ncbi.nlm.nih.gov/pubmed/?cmd=HistorySearch&querykey=13) |
| Search **Light therap*** | [7256](https://www.ncbi.nlm.nih.gov/pubmed/?cmd=HistorySearch&querykey=12) |
| Search **"Phototherapy"[Mesh]** | [39365](https://www.ncbi.nlm.nih.gov/pubmed/?cmd=HistorySearch&querykey=11) |
| Search **((((((mdd) OR depressive disorder*) OR "depression") OR affective disorder*) OR trd) OR "Mood Disorders"[Mesh]) OR "Depression"[Mesh]** | [434192](https://www.ncbi.nlm.nih.gov/pubmed/?cmd=HistorySearch&querykey=10) |
| Search **"Depression"[Mesh]** | [111457](https://www.ncbi.nlm.nih.gov/pubmed/?cmd=HistorySearch&querykey=9) |
| Search **"Mood Disorders"[Mesh]** | [117523](https://www.ncbi.nlm.nih.gov/pubmed/?cmd=HistorySearch&querykey=8) |
| Search **trd** | [1435](https://www.ncbi.nlm.nih.gov/pubmed/?cmd=HistorySearch&querykey=5) |
| Search **affective disorder*** | [19361](https://www.ncbi.nlm.nih.gov/pubmed/?cmd=HistorySearch&querykey=4) |
| Search **"depression"** | [381793](https://www.ncbi.nlm.nih.gov/pubmed/?cmd=HistorySearch&querykey=3) |
| Search **depressive disorder*** | [112073](https://www.ncbi.nlm.nih.gov/pubmed/?cmd=HistorySearch&querykey=2) |
| Search **mdd** | [12034](https://www.ncbi.nlm.nih.gov/pubmed/?cmd=HistorySearch&querykey=1) |

## PubMed, expanded

Date of search: 16.09.2019

| **Query** | **Items found** |
| --- | --- |
| Search **(((((((("Phototherapy"[Mesh]) OR Light therap*) OR Light treatment*) OR phototherap*) OR photo therap*)) AND (((((((mdd) OR depressive disorder*) OR "depression") OR affective disorder*) OR trd) OR "Mood Disorders"[Mesh]) OR "Depression"[Mesh]))) NOT ((((((("Systematic Review" [Publication Type]) OR "Meta-Analysis" [Publication Type])))) OR "Review" [Publication Type]) OR "Guideline" [Publication Type])** Filters: **Danish; English; Norwegian; Swedish** | [993](https://www.ncbi.nlm.nih.gov/pubmed/?cmd=HistorySearch&querykey=40) |
| Search **(((((((("Phototherapy"[Mesh]) OR Light therap*) OR Light treatment*) OR phototherap*) OR photo therap*)) AND (((((((mdd) OR depressive disorder*) OR "depression") OR affective disorder*) OR trd) OR "Mood Disorders"[Mesh]) OR "Depression"[Mesh]))) NOT ((((((("Systematic Review" [Publication Type]) OR "Meta-Analysis" [Publication Type])))) OR "Review" [Publication Type]) OR "Guideline" [Publication Type])** | [1084](https://www.ncbi.nlm.nih.gov/pubmed/?cmd=HistorySearch&querykey=36) |
| Search **(((((("Systematic Review" [Publication Type]) OR "Meta-Analysis" [Publication Type])))) OR "Review" [Publication Type]) OR "Guideline" [Publication Type]** | [2644789](https://www.ncbi.nlm.nih.gov/pubmed/?cmd=HistorySearch&querykey=35) |
| Search **(((((("Phototherapy"[Mesh]) OR Light therap*) OR Light treatment*) OR phototherap*) OR photo therap*)) AND (((((((mdd) OR depressive disorder*) OR "depression") OR affective disorder*) OR trd) OR "Mood Disorders"[Mesh]) OR "Depression"[Mesh])** | [1493](https://www.ncbi.nlm.nih.gov/pubmed/?cmd=HistorySearch&querykey=23) |
| Search **(((("Phototherapy"[Mesh]) OR Light therap*) OR Light treatment*) OR phototherap*) OR photo therap*** | [45603](https://www.ncbi.nlm.nih.gov/pubmed/?cmd=HistorySearch&querykey=22) |
| Search **photo therap*** | [89](https://www.ncbi.nlm.nih.gov/pubmed/?cmd=HistorySearch&querykey=21) |
| Search **phototherap*** | [14161](https://www.ncbi.nlm.nih.gov/pubmed/?cmd=HistorySearch&querykey=20) |
| Search **Light treatment*** | [2440](https://www.ncbi.nlm.nih.gov/pubmed/?cmd=HistorySearch&querykey=19) |
| Search **Light therap*** | [7260](https://www.ncbi.nlm.nih.gov/pubmed/?cmd=HistorySearch&querykey=18) |
| Search **"Phototherapy"[Mesh]** | [39390](https://www.ncbi.nlm.nih.gov/pubmed/?cmd=HistorySearch&querykey=17) |
| Search **((((((mdd) OR depressive disorder*) OR "depression") OR affective disorder*) OR trd) OR "Mood Disorders"[Mesh]) OR "Depression"[Mesh]** | [434629](https://www.ncbi.nlm.nih.gov/pubmed/?cmd=HistorySearch&querykey=16) |

## Embase

Date of search: 10.09.2019

| **#** | **Searches** | **Results** |
| --- | --- | --- |
| 1 | mdd.mp. | 18143 |
| 2 | depressive disorder*.mp. | 50751 |
| 3 | depression.mp. | 639976 |
| 4 | affective disorder*.mp. | 24518 |
| 5 | trd.mp. | 2299 |
| 6 | exp mood disorder/ | 489872 |
| 7 | 1 or 2 or 3 or 4 or 5 or 6 | 719696 |
| 8 | exp phototherapy/ | 82946 |
| 9 | exp phototherapy device/ | 978 |
| 10 | light therap*.mp. | 3372 |
| 11 | light treatment*.mp. | 2590 |
| 12 | phototherap*.mp. | 27122 |
| 13 | photo therap*.mp. | 153 |
| 14 | 8 or 9 or 10 or 11 or 12 or 13 | 87713 |
| 15 | 7 and 14 | 3049 |
| 16 | limit 15 to (randomized controlled trial or controlled clinical trial) | 316 |
| 17 | (((random* or cluster-random* or control?ed or crossover or cross-over or blind* or mask*) adj3 (trial*1 or study or studies or analy*)) or rct).ti,ab,kw. | 874496 |
| 18 | (placebo* or single-blind* or double-blind* or triple-blind*).ti,ab,kw. | 383176 |
| 19 | ((single or double or triple) adj2 (blind* or mask*)).ti,ab,kw. | 230920 |
| 20 | ((patient* or person* or participant* or population* or allocate* or assign*) adj3 (random* or blind* or mask*)).ti,ab,kw. | 342281 |
| 21 | 17 or 18 or 19 or 20 | 1157699 |
| 22 | 15 and 21 | 571 |
| 23 | 16 or 22 | 650 |
| 24 | "systematic review"/ | 218453 |
| 25 | exp meta analysis/ | 171400 |
| 26 | 24 or 25 | 308211 |
| 27 | 23 not 26 | 569 |
| 28 | limit 27 to (danish or english or norwegian or swedish) | 541 |
| 29 | 28 not Conference Abstract.pt. | 454 |

## Embase, expanded

Date of search: 16.09.2019

| **#** | **Searches** | **Results** |
| --- | --- | --- |
| 1 | mdd.mp. | 18202 |
| 2 | depressive disorder*.mp. | 50865 |
| 3 | depression.mp. | 641237 |
| 4 | affective disorder*.mp. | 24565 |
| 5 | trd.mp. | 2311 |
| 6 | exp mood disorder/ | 490952 |
| 7 | 1 or 2 or 3 or 4 or 5 or 6 | 721102 |
| 8 | exp phototherapy/ | 83130 |
| 9 | exp phototherapy device/ | 980 |
| 10 | light therap*.mp. | 3377 |
| 11 | light treatment*.mp. | 2592 |
| 12 | phototherap*.mp. | 27167 |
| 13 | photo therap*.mp. | 153 |
| 14 | 8 or 9 or 10 or 11 or 12 or 13 | 87901 |
| 15 | 7 and 14 | 3054 |
| 16 | "systematic review"/ | 219394 |
| 17 | exp meta analysis/ | 172000 |
| 18 | exp "review"/ | 2526469 |
| 19 | exp practice guideline/ | 518345 |
| 20 | Conference Abstract.pt. | 3562160 |
| 21 | 16 or 17 or 18 or 19 or 20 | 6448612 |
| 22 | 15 not 21 | 1745 |
| 23 | limit 22 to (danish or english or norwegian or swedish) | 1559 |

## PsycInfo

Date of search: 10.09.2019

| **#** | **Searches** | **Results** |
| --- | --- | --- |
| 1 | mdd.mp. | 9851 |
| 2 | depressive disorder*.mp. | 74660 |
| 3 | depression.mp. | 314551 |
| 4 | affective disorder*.mp. | 33533 |
| 5 | trd.mp. | 693 |
| 6 | exp affective disorders/ | 136805 |
| 7 | "depression (emotion)"/ | 25067 |
| 8 | 1 or 2 or 3 or 4 or 5 or 6 or 7 | 342393 |
| 9 | phototherapy/ | 930 |
| 10 | light therap*.mp. | 917 |
| 11 | light treatment*.mp. | 400 |
| 12 | phototherap*.mp. | 1357 |
| 13 | photo therap*.mp. | 12 |
| 14 | 9 or 10 or 11 or 12 or 13 | 1733 |
| 15 | 8 and 14 | 1068 |
| 16 | (((random* or cluster-random* or control?ed or crossover or cross-over or blind* or mask*) adj3 (trial*1 or study or studies or analy*)) or rct).ti,ab,id. | 93968 |
| 17 | (placebo* or single-blind* or double-blind* or triple-blind*).ti,ab,id. | 47476 |
| 18 | ((single or double or triple) adj2 (blind* or mask*)).ti,ab,id. | 25416 |
| 19 | ((patient* or person* or participant* or population* or allocate* or assign*) adj3 (random* or blind* or mask*)).ti,ab,id. | 56142 |
| 20 | 16 or 17 or 18 or 19 | 152814 |
| 21 | 15 and 20 | 266 |
| 22 | limit 15 to ("0830 systematic review" or 1200 meta analysis) | 31 |
| 23 | 21 not 22 | 251 |
| 24 | limit 23 to (danish or english or norwegian or swedish) | 241 |

## Psycinfo, expanded

Date of search: 16.09.2019

| **#** | **Searches** | **Results** |
| --- | --- | --- |
| 1 | mdd.mp. | 9864 |
| 2 | depressive disorder*.mp. | 74688 |
| 3 | depression.mp. | 314857 |
| 4 | affective disorder*.mp. | 33548 |
| 5 | trd.mp. | 695 |
| 6 | exp affective disorders/ | 136933 |
| 7 | "depression (emotion)"/ | 25075 |
| 8 | 1 or 2 or 3 or 4 or 5 or 6 or 7 | 342711 |
| 9 | phototherapy/ | 931 |
| 10 | light therap*.mp. | 919 |
| 11 | light treatment*.mp. | 400 |
| 12 | phototherap*.mp. | 1358 |
| 13 | photo therap*.mp. | 12 |
| 14 | 9 or 10 or 11 or 12 or 13 | 1735 |
| 15 | 8 and 14 | 1070 |
| 16 | limit 15 to ("0830 systematic review" or 1200 meta analysis) | 31 |
| 17 | exp "literature review"/ | 22634 |
| 18 | treatment guidelines/ | 6521 |
| 19 | limit 15 to ("0200 book" or "0240 authored book" or "0280 edited book") | 93 |
| 20 | 16 or 17 or 18 or 19 | 29268 |
| 21 | 15 not 20 | 922 |
| 22 | limit 21 to (danish or english or norwegian or swedish) | 868 |

## CINAHL

Date of search: 11.09.2019

| **#** | **Query** | **Limiters/Expanders** | **Results** |
| --- | --- | --- | --- |
| S25 | S20 NOT S23 | Limiters - Language: Danish, English, Norwegian, Swedish  Expanders - Apply equivalent subjects  Search modes - Boolean/Phrase | 98 |
| S24 | S20 NOT S23 | Expanders - Apply equivalent subjects  Search modes - Boolean/Phrase | 98 |
| S23 | S21 OR S22 | Expanders - Apply equivalent subjects  Search modes - Boolean/Phrase | 93,330 |
| S22 | (MH "Meta Analysis") | Expanders - Apply equivalent subjects  Search modes - Boolean/Phrase | 39,781 |
| S21 | (MH "Systematic Review") | Expanders - Apply equivalent subjects  Search modes - Boolean/Phrase | 73,231 |
| S20 | S14 AND S19 | Expanders - Apply equivalent subjects  Search modes - Boolean/Phrase | 110 |
| S19 | S15 OR S16 OR S17 OR S18 | Expanders - Apply equivalent subjects  Search modes - Boolean/Phrase | 457,460 |
| S18 | ((patient* or person* or participant* or population* or allocate* or assign*) N3 (random* or blind* or mask*)) | Expanders - Apply equivalent subjects  Search modes - Boolean/Phrase | 294,039 |
| S17 | (placebo* or single-blind* or double-blind* or triple-blind* or ((single or double or triple) N1 (blind* or mask*)) | Expanders - Apply equivalent subjects  Search modes - Boolean/Phrase | 96,864 |
| S16 | (((random* or cluster-random* or control#ed or crossover or cross-over or blind* or mask*) N3 (trial* or study or studies or analy*)) or rct) | Expanders - Apply equivalent subjects  Search modes - Boolean/Phrase | 433,645 |
| S15 | PT Randomized Controlled Trial | Expanders - Apply equivalent subjects  Search modes - Boolean/Phrase | 87,063 |
| S14 | S7 AND S13 | Expanders - Apply equivalent subjects  Search modes - Boolean/Phrase | 485 |
| S13 | S8 OR S9 OR S10 OR S11 OR S12 | Search modes - Boolean/Phrase | 4,043 |
| S12 | "photo therap*" | Search modes - Boolean/Phrase | 13 |
| S11 | phototherap* | Search modes - Boolean/Phrase | 3,660 |
| S10 | "light treatment*" | Search modes - Boolean/Phrase | 183 |
| S9 | "light therap*" | Search modes - Boolean/Phrase | 629 |
| S8 | (MH "Phototherapy") | Search modes - Boolean/Phrase | 2,974 |
| S7 | S1 OR S2 OR S3 OR S4 OR S5 OR S6 | Search modes - Boolean/Phrase | 154,695 |
| S6 | (MH "Affective Disorders+") | Search modes - Boolean/Phrase | 104,921 |
| S5 | trd | Search modes - Boolean/Phrase | 267 |
| S4 | "affective disorder*" | Search modes - Boolean/Phrase | 9,218 |
| S3 | depression | Search modes - Boolean/Phrase | 146,871 |
| S2 | "depressive disorder*" | Search modes - Boolean/Phrase | 9,254 |
| S1 | mdd | Search modes - Boolean/Phrase | 3,172 |

## CINAHL, expanded

Date of search: 16.09.2019

| **#** | **Query** | **Limiters/Expanders** | **Results** |
| --- | --- | --- | --- |
| S22 | S14 NOT S20 | Limiters - Language: Danish, English, Norwegian, Swedish  Expanders - Apply equivalent subjects  Search modes - Boolean/Phrase | 413 |
| S21 | S14 NOT S20 | Expanders - Apply equivalent subjects  Search modes - Boolean/Phrase | 415 |
| S20 | S15 OR S16 OR S17 OR S18 OR S19 | Expanders - Apply equivalent subjects  Search modes - Boolean/Phrase | 169,672 |
| S19 | S7 AND S13 | Limiters - Publication Type: Review  Expanders - Apply equivalent subjects  Search modes - Boolean/Phrase | 41 |
| S18 | (MH "Practice Guidelines") | Expanders - Apply equivalent subjects  Search modes - Boolean/Phrase | 69,292 |
| S17 | (MH "Literature Review+") | Expanders - Apply equivalent subjects  Search modes - Boolean/Phrase | 82,786 |
| S16 | (MH "Meta Analysis") | Expanders - Apply equivalent subjects  Search modes - Boolean/Phrase | 39,840 |
| S15 | (MH "Systematic Review") | Expanders - Apply equivalent subjects  Search modes - Boolean/Phrase | 73,330 |
| S14 | S7 AND S13 | Expanders - Apply equivalent subjects  Search modes - Boolean/Phrase | 486 |
| S13 | S8 OR S9 OR S10 OR S11 OR S12 | Search modes - Boolean/Phrase | 4,049 |
| S12 | "photo therap*" | Search modes - Boolean/Phrase | 13 |
| S11 | phototherap* | Search modes - Boolean/Phrase | 3,665 |
| S10 | "light treatment*" | Search modes - Boolean/Phrase | 183 |
| S9 | "light therap*" | Search modes - Boolean/Phrase | 630 |
| S8 | (MH "Phototherapy") | Search modes - Boolean/Phrase | 2,978 |
| S7 | S1 OR S2 OR S3 OR S4 OR S5 OR S6 | Search modes - Boolean/Phrase | 154,899 |
| S6 | (MH "Affective Disorders+") | Search modes - Boolean/Phrase | 105,064 |
| S5 | trd | Search modes - Boolean/Phrase | 268 |
| S4 | "affective disorder*" | Search modes - Boolean/Phrase | 9,234 |
| S3 | depression | Search modes - Boolean/Phrase | 147,065 |
| S2 | "depressive disorder*" | Search modes - Boolean/Phrase | 9,264 |
| S1 | mdd | Search modes - Boolean/Phrase | 3,174 |

## The Cochrane library

Date of search: 11.09.2019


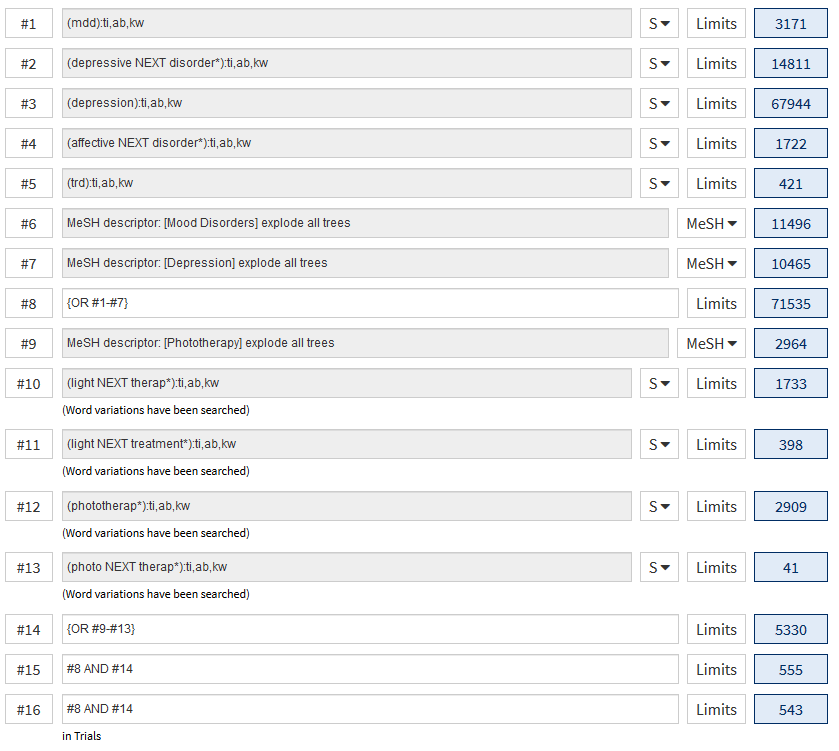


**References in total: 1738. After deduplication: 818.**

**Expanded search: references in total: 3833. After deduplication 2500.**

# PICO 4 (CBASP)

## PubMed

Date of search: 19.09.2019

| **Query** | **Items found** |
| --- | --- |
| Search **((((((cbasp) OR "Cognitive Behavioural" "Analysis System" "Psychotherapy") OR "Cognitive Behavioral Analysis System of Psychotherapy")) AND (((((((mdd) OR depressive disorder*) OR "depression") OR affective disorder*) OR trd) OR "Mood Disorders"[Mesh]) OR "Depression"[Mesh]))) NOT ((((((("Systematic Review" [Publication Type]) OR "Meta-Analysis" [Publication Type])))) OR "Review" [Publication Type]) OR "Guideline" [Publication Type])** Filters: **Danish; English; Norwegian; Swedish** | [68](https://www.ncbi.nlm.nih.gov/pubmed/?cmd=HistorySearch&querykey=22) |
| Search **((((((cbasp) OR "Cognitive Behavioural" "Analysis System" "Psychotherapy") OR "Cognitive Behavioral Analysis System of Psychotherapy")) AND (((((((mdd) OR depressive disorder*) OR "depression") OR affective disorder*) OR trd) OR "Mood Disorders"[Mesh]) OR "Depression"[Mesh]))) NOT ((((((("Systematic Review" [Publication Type]) OR "Meta-Analysis" [Publication Type])))) OR "Review" [Publication Type]) OR "Guideline" [Publication Type])** | [72](https://www.ncbi.nlm.nih.gov/pubmed/?cmd=HistorySearch&querykey=17) |
| Search **(((((("Systematic Review" [Publication Type]) OR "Meta-Analysis" [Publication Type])))) OR "Review" [Publication Type]) OR "Guideline" [Publication Type]** | [2646387](https://www.ncbi.nlm.nih.gov/pubmed/?cmd=HistorySearch&querykey=16) |
| Search **((((cbasp) OR "Cognitive Behavioural" "Analysis System" "Psychotherapy") OR "Cognitive Behavioral Analysis System of Psychotherapy")) AND (((((((mdd) OR depressive disorder*) OR "depression") OR affective disorder*) OR trd) OR "Mood Disorders"[Mesh]) OR "Depression"[Mesh])** | [89](https://www.ncbi.nlm.nih.gov/pubmed/?cmd=HistorySearch&querykey=15) |
| Search **((cbasp) OR "Cognitive Behavioural" "Analysis System" "Psychotherapy") OR "Cognitive Behavioral Analysis System of Psychotherapy"** | [92](https://www.ncbi.nlm.nih.gov/pubmed/?cmd=HistorySearch&querykey=14) |
| Search **"Cognitive Behavioral Analysis System of Psychotherapy"** | [83](https://www.ncbi.nlm.nih.gov/pubmed/?cmd=HistorySearch&querykey=13) |
| Search **"Cognitive Behavioural" "Analysis System" "Psychotherapy"** | [8](https://www.ncbi.nlm.nih.gov/pubmed/?cmd=HistorySearch&querykey=12) |
| Search **cbasp** | [79](https://www.ncbi.nlm.nih.gov/pubmed/?cmd=HistorySearch&querykey=11) |
| Search **((((((mdd) OR depressive disorder*) OR "depression") OR affective disorder*) OR trd) OR "Mood Disorders"[Mesh]) OR "Depression"[Mesh]** | [434826](https://www.ncbi.nlm.nih.gov/pubmed/?cmd=HistorySearch&querykey=10) |
| Search **"Depression"[Mesh]** | [111654](https://www.ncbi.nlm.nih.gov/pubmed/?cmd=HistorySearch&querykey=9) |
| Search **"Mood Disorders"[Mesh]** | [117673](https://www.ncbi.nlm.nih.gov/pubmed/?cmd=HistorySearch&querykey=8) |
| Search **trd** | [1441](https://www.ncbi.nlm.nih.gov/pubmed/?cmd=HistorySearch&querykey=5) |
| Search **affective disorder*** | [19392](https://www.ncbi.nlm.nih.gov/pubmed/?cmd=HistorySearch&querykey=4) |
| Search **"depression"** | [382364](https://www.ncbi.nlm.nih.gov/pubmed/?cmd=HistorySearch&querykey=3) |
| Search **depressive disorder*** | [112213](https://www.ncbi.nlm.nih.gov/pubmed/?cmd=HistorySearch&querykey=2) |
| Search **mdd** | [12057](https://www.ncbi.nlm.nih.gov/pubmed/?cmd=HistorySearch&querykey=1) |

## Embase

Date of search: 19.09.2019

| **#** | **Searches** | **Results** |
| --- | --- | --- |
| 1 | mdd.mp. | 18230 |
| 2 | depressive disorder*.mp. | 50927 |
| 3 | depression.mp. | 641873 |
| 4 | affective disorder*.mp. | 24584 |
| 5 | trd.mp. | 2315 |
| 6 | exp mood disorder/ | 491382 |
| 7 | 1 or 2 or 3 or 4 or 5 or 6 | 721815 |
| 8 | cbasp.mp. | 118 |
| 9 | Cognitive Behavioral Analysis System of Psychotherapy.mp. | 119 |
| 10 | Cognitive Behavioural Analysis System of Psychotherapy.mp. | 15 |
| 11 | 8 or 9 or 10 | 148 |
| 12 | 7 and 11 | 143 |
| 13 | "systematic review"/ | 220393 |
| 14 | exp meta analysis/ | 172542 |
| 15 | exp "review"/ | 2529229 |
| 16 | exp practice guideline/ | 519026 |
| 17 | Conference Abstract.pt. | 3565831 |
| 18 | 13 or 14 or 15 or 16 or 17 | 6455486 |
| 19 | 12 not 18 | 100 |
| 20 | limit 19 to (danish or english or norwegian or swedish) | 87 |

## PsycInfo

Date of search: 19.09.2019

| **#** | **Searches** | **Results** |
| --- | --- | --- |
| 1 | mdd.mp. | 9864 |
| 2 | depressive disorder*.mp. | 74688 |
| 3 | depression.mp. | 314857 |
| 4 | affective disorder*.mp. | 33548 |
| 5 | trd.mp. | 695 |
| 6 | exp affective disorders/ | 136933 |
| 7 | "depression (emotion)"/ | 25075 |
| 8 | 1 or 2 or 3 or 4 or 5 or 6 or 7 | 342711 |
| 9 | cbasp.mp. | 132 |
| 10 | Cognitive Behavioral Analysis System of Psychotherapy.mp. | 147 |
| 11 | Cognitive Behavioural Analysis System of Psychotherapy.mp. | 8 |
| 12 | 9 or 10 or 11 | 166 |
| 13 | 8 and 12 | 152 |
| 14 | limit 13 to ("0830 systematic review" or 1200 meta analysis) | 7 |
| 15 | exp "literature review"/ | 22634 |
| 16 | treatment guidelines/ | 6521 |
| 17 | limit 13 to ("0200 book" or "0240 authored book" or "0280 edited book") | 19 |
| 18 | 14 or 15 or 16 or 17 | 29169 |
| 19 | 13 not 18 | 125 |
| 20 | limit 19 to (danish or english or norwegian or swedish) | 99 |

## CINAHL

Date of search: 19.09.2019

| **#** | **Query** | **Limiters/Expanders** | **Results** |
| --- | --- | --- | --- |
| S20 | S12 NOT S18 | Limiters - Language: Danish, English, Norwegian, Swedish  Expanders - Apply equivalent subjects  Search modes - Boolean/Phrase | 30 |
| S19 | S12 NOT S18 | Expanders - Apply equivalent subjects  Search modes - Boolean/Phrase | 30 |
| S18 | S13 OR S14 OR S15 OR S16 OR S17 | Expanders - Apply equivalent subjects  Search modes - Boolean/Phrase | 169,917 |
| S17 | S7 AND S11 | Limiters - Publication Type: Review  Expanders - Apply equivalent subjects  Search modes - Boolean/Phrase | 1 |
| S16 | (MH "Practice Guidelines") | Expanders - Apply equivalent subjects  Search modes - Boolean/Phrase | 69,408 |
| S15 | (MH "Literature Review+") | Expanders - Apply equivalent subjects  Search modes - Boolean/Phrase | 82,928 |
| S14 | (MH "Meta Analysis") | Expanders - Apply equivalent subjects  Search modes - Boolean/Phrase | 39,893 |
| S13 | (MH "Systematic Review") | Expanders - Apply equivalent subjects  Search modes - Boolean/Phrase | 73,453 |
| S12 | S7 AND S11 | Expanders - Apply equivalent subjects  Search modes - Boolean/Phrase | 33 |
| S11 | S8 OR S9 OR S10 | Search modes - Boolean/Phrase | 33 |
| S10 | "Cognitive Behavioural Analysis System of Psychotherapy" | Search modes - Boolean/Phrase | 4 |
| S9 | "Cognitive Behavioral Analysis System of Psychotherapy" | Search modes - Boolean/Phrase | 28 |
| S8 | cbasp | Search modes - Boolean/Phrase | 20 |
| S7 | S1 OR S2 OR S3 OR S4 OR S5 OR S6 | Search modes - Boolean/Phrase | 155,098 |
| S6 | (MH "Affective Disorders+") | Search modes - Boolean/Phrase | 105,218 |
| S5 | trd | Search modes - Boolean/Phrase | 269 |
| S4 | "affective disorder*" | Search modes - Boolean/Phrase | 9,253 |
| S3 | depression | Search modes - Boolean/Phrase | 147,248 |
| S2 | "depressive disorder*" | Search modes - Boolean/Phrase | 9,277 |
| S1 | mdd | Search modes - Boolean/Phrase | 3,176 |

## The Cochrane Library

Date of search: 19.09.2019


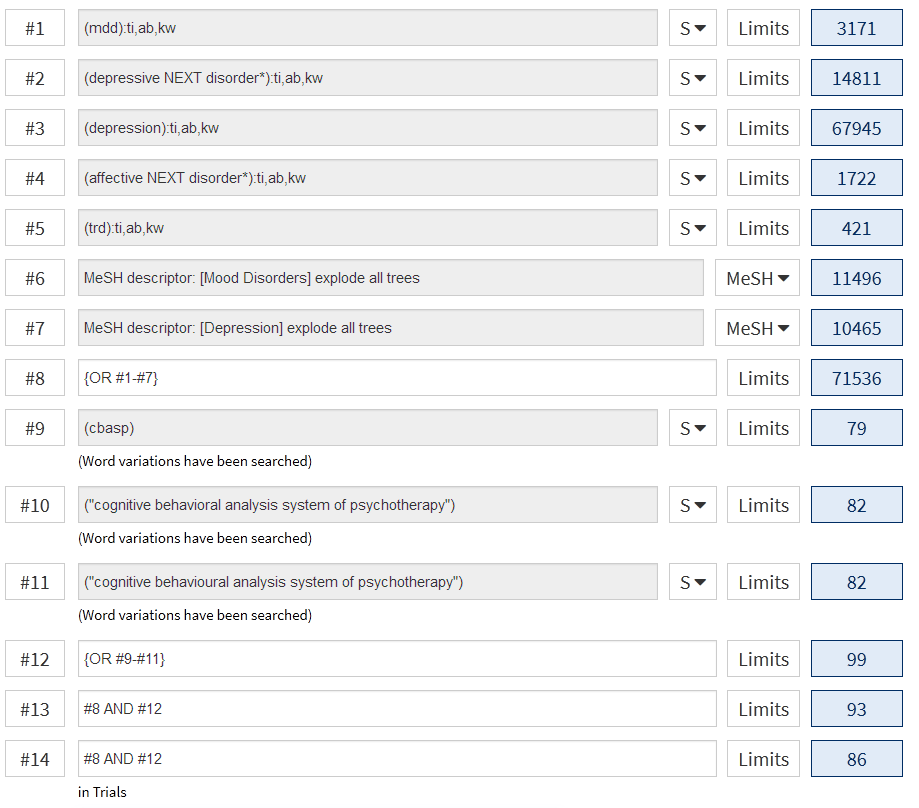


**References in total: 370. After deduplication: 144.**

# PICO 5 (rumination)

## PubMed

Date of search: 21.10.2019

| **Query** | **Items found** |
| --- | --- |
| Search **((((((((((((((((((((((((("Mindfulness"[Mesh]) OR Mindfulness-based Cognitive Therap*) OR "Rumination, Cognitive"[Mesh]) OR "rumination focused") OR "cbm") OR "cognitive bias modification") OR "attentional bias modification") OR "abm") OR "attention bias modification") OR "cct") OR "Cognitive Control Training") OR mbct) OR "cnt") OR "Concreteness training") OR "mct") OR meta cognitive therap*) OR metacognitive therap*) OR ("rf" cbt)) OR "rfcbt") OR "perseverative thinking") OR rnt) OR "repetitive negative thinking")) AND (((((((affective disorder*) OR trd) OR "Mood Disorders"[Mesh]) OR "Depression"[Mesh]) OR mdd) OR depressive disorder*) OR "depression"))) NOT ((((((((("Systematic Review" [Publication Type]) OR "Meta-Analysis" [Publication Type])))) OR "Review" [Publication Type]) OR "Guideline" [Publication Type])) OR ("Clinical Trial Protocol" [Publication Type] OR "study protocol"[title]))** Filters: **Danish; English; Norwegian; Swedish** | [1253](https://www.ncbi.nlm.nih.gov/pubmed/?cmd=HistorySearch&querykey=53) |
| Search **((((((((((((((((((((((((("Mindfulness"[Mesh]) OR Mindfulness-based Cognitive Therap*) OR "Rumination, Cognitive"[Mesh]) OR "rumination focused") OR "cbm") OR "cognitive bias modification") OR "attentional bias modification") OR "abm") OR "attention bias modification") OR "cct") OR "Cognitive Control Training") OR mbct) OR "cnt") OR "Concreteness training") OR "mct") OR meta cognitive therap*) OR metacognitive therap*) OR ("rf" cbt)) OR "rfcbt") OR "perseverative thinking") OR rnt) OR "repetitive negative thinking")) AND (((((((affective disorder*) OR trd) OR "Mood Disorders"[Mesh]) OR "Depression"[Mesh]) OR mdd) OR depressive disorder*) OR "depression"))) NOT ((((((((("Systematic Review" [Publication Type]) OR "Meta-Analysis" [Publication Type])))) OR "Review" [Publication Type]) OR "Guideline" [Publication Type])) OR ("Clinical Trial Protocol" [Publication Type] OR "study protocol"[title]))** | [1293](https://www.ncbi.nlm.nih.gov/pubmed/?cmd=HistorySearch&querykey=48) |
| Search **(((((((("Systematic Review" [Publication Type]) OR "Meta-Analysis" [Publication Type])))) OR "Review" [Publication Type]) OR "Guideline" [Publication Type])) OR ("Clinical Trial Protocol" [Publication Type] OR "study protocol"[title])** | [2667174](https://www.ncbi.nlm.nih.gov/pubmed/?cmd=HistorySearch&querykey=47) |
| Search **((((((((((((((((((((((("Mindfulness"[Mesh]) OR Mindfulness-based Cognitive Therap*) OR "Rumination, Cognitive"[Mesh]) OR "rumination focused") OR "cbm") OR "cognitive bias modification") OR "attentional bias modification") OR "abm") OR "attention bias modification") OR "cct") OR "Cognitive Control Training") OR mbct) OR "cnt") OR "Concreteness training") OR "mct") OR meta cognitive therap*) OR metacognitive therap*) OR ("rf" cbt)) OR "rfcbt") OR "perseverative thinking") OR rnt) OR "repetitive negative thinking")) AND (((((((affective disorder*) OR trd) OR "Mood Disorders"[Mesh]) OR "Depression"[Mesh]) OR mdd) OR depressive disorder*) OR "depression")** | [1626](https://www.ncbi.nlm.nih.gov/pubmed/?cmd=HistorySearch&querykey=46) |
| Search **((((((((((((((((((((("Mindfulness"[Mesh]) OR Mindfulness-based Cognitive Therap*) OR "Rumination, Cognitive"[Mesh]) OR "rumination focused") OR "cbm") OR "cognitive bias modification") OR "attentional bias modification") OR "abm") OR "attention bias modification") OR "cct") OR "Cognitive Control Training") OR mbct) OR "cnt") OR "Concreteness training") OR "mct") OR meta cognitive therap*) OR metacognitive therap*) OR ("rf" cbt)) OR "rfcbt") OR "perseverative thinking") OR rnt) OR "repetitive negative thinking"** | [31436](https://www.ncbi.nlm.nih.gov/pubmed/?cmd=HistorySearch&querykey=45) |
| Search **"repetitive negative thinking"** | [103](https://www.ncbi.nlm.nih.gov/pubmed/?cmd=HistorySearch&querykey=44) |
| Search **rnt** | [360](https://www.ncbi.nlm.nih.gov/pubmed/?cmd=HistorySearch&querykey=41) |
| Search **"perseverative thinking"** | [51](https://www.ncbi.nlm.nih.gov/pubmed/?cmd=HistorySearch&querykey=40) |
| Search **"rfcbt"** | [9](https://www.ncbi.nlm.nih.gov/pubmed/?cmd=HistorySearch&querykey=39) |
| Search **("rf" cbt)** | [8](https://www.ncbi.nlm.nih.gov/pubmed/?cmd=HistorySearch&querykey=36) |
| Search **metacognitive therap*** | [149](https://www.ncbi.nlm.nih.gov/pubmed/?cmd=HistorySearch&querykey=35) |
| Search **meta cognitive therap*** | [10](https://www.ncbi.nlm.nih.gov/pubmed/?cmd=HistorySearch&querykey=34) |
| Search **"mct"** | [6163](https://www.ncbi.nlm.nih.gov/pubmed/?cmd=HistorySearch&querykey=31) |
| Search **"Concreteness training"** | [10](https://www.ncbi.nlm.nih.gov/pubmed/?cmd=HistorySearch&querykey=30) |
| Search **"cnt"** | [7215](https://www.ncbi.nlm.nih.gov/pubmed/?cmd=HistorySearch&querykey=27) |
| Search **mbct** | [417](https://www.ncbi.nlm.nih.gov/pubmed/?cmd=HistorySearch&querykey=26) |
| Search **"Cognitive Control Training"** | [29](https://www.ncbi.nlm.nih.gov/pubmed/?cmd=HistorySearch&querykey=25) |
| Search **"cct"** | [7724](https://www.ncbi.nlm.nih.gov/pubmed/?cmd=HistorySearch&querykey=22) |
| Search **"attention bias modification"** | [180](https://www.ncbi.nlm.nih.gov/pubmed/?cmd=HistorySearch&querykey=21) |
| Search **"abm"** | [1426](https://www.ncbi.nlm.nih.gov/pubmed/?cmd=HistorySearch&querykey=20) |
| Search **"attentional bias modification"** | [99](https://www.ncbi.nlm.nih.gov/pubmed/?cmd=HistorySearch&querykey=19) |
| Search **"cognitive bias modification"** | [306](https://www.ncbi.nlm.nih.gov/pubmed/?cmd=HistorySearch&querykey=18) |
| Search **"cbm"** | [4982](https://www.ncbi.nlm.nih.gov/pubmed/?cmd=HistorySearch&querykey=17) |
| Search **"rumination focused"** | [18](https://www.ncbi.nlm.nih.gov/pubmed/?cmd=HistorySearch&querykey=16) |
| Search **"Rumination, Cognitive"[Mesh]** | [221](https://www.ncbi.nlm.nih.gov/pubmed/?cmd=HistorySearch&querykey=15) |
| Search **Mindfulness-based Cognitive Therap*** | [534](https://www.ncbi.nlm.nih.gov/pubmed/?cmd=HistorySearch&querykey=14) |
| Search **"Mindfulness"[Mesh]** | [2695](https://www.ncbi.nlm.nih.gov/pubmed/?cmd=HistorySearch&querykey=13) |
| Search **((((((affective disorder*) OR trd) OR "Mood Disorders"[Mesh]) OR "Depression"[Mesh]) OR mdd) OR depressive disorder*) OR "depression"** | [436656](https://www.ncbi.nlm.nih.gov/pubmed/?cmd=HistorySearch&querykey=12) |
| Search **"depression"** | [384058](https://www.ncbi.nlm.nih.gov/pubmed/?cmd=HistorySearch&querykey=11) |
| Search **depressive disorder*** | [112612](https://www.ncbi.nlm.nih.gov/pubmed/?cmd=HistorySearch&querykey=10) |
| Search **mdd** | [12158](https://www.ncbi.nlm.nih.gov/pubmed/?cmd=HistorySearch&querykey=9) |
| Search **"Depression"[Mesh]** | [112314](https://www.ncbi.nlm.nih.gov/pubmed/?cmd=HistorySearch&querykey=8) |
| Search **"Mood Disorders"[Mesh]** | [118057](https://www.ncbi.nlm.nih.gov/pubmed/?cmd=HistorySearch&querykey=7) |
| Search **trd** | [1455](https://www.ncbi.nlm.nih.gov/pubmed/?cmd=HistorySearch&querykey=4) |
| Search **affective disorder*** | [19439](https://www.ncbi.nlm.nih.gov/pubmed/?cmd=HistorySearch&querykey=3) |

## Embase

Date of search: 21.10.2019

| **#** | **Searches** | **Results** |
| --- | --- | --- |
| 1 | mdd.mp. | 18583 |
| 2 | depressive disorder*.mp. | 51415 |
| 3 | depression.mp. | 646262 |
| 4 | affective disorder*.mp. | 24714 |
| 5 | trd.mp. | 2354 |
| 6 | exp mood disorder/ | 495093 |
| 7 | 1 or 2 or 3 or 4 or 5 or 6 | 726869 |
| 8 | mindfulness/ | 7208 |
| 9 | cognitive rumination/ | 318 |
| 10 | cbm.mp. | 5867 |
| 11 | cognitive bias modification.mp. | 406 |
| 12 | attentional bias modification.mp. | 128 |
| 13 | abm.mp. | 1628 |
| 14 | attention bias modification.mp. | 206 |
| 15 | cct.mp. | 8157 |
| 16 | Cognitive Control Training.mp. | 52 |
| 17 | mbct.mp. | 591 |
| 18 | cnt.mp. | 5733 |
| 19 | Concreteness training.mp. | 11 |
| 20 | mct.mp. | 9670 |
| 21 | meta cognitive therap*.mp. | 21 |
| 22 | metacognitive therap*.mp. | 197 |
| 23 | rfcbt.mp. | 8 |
| 24 | rf cbt.mp. | 0 |
| 25 | perseverative thinking.mp. | 81 |
| 26 | rnt.mp. | 282 |
| 27 | repetitive negative thinking.mp. | 127 |
| 28 | Mindfulness-based Cognitive Therap*.mp. | 805 |
| 29 | rumination focused.mp. | 24 |
| 30 | or/8-29 | 39635 |
| 31 | 7 and 30 | 3629 |
| 32 | "systematic review"/ | 223403 |
| 33 | exp meta analysis/ | 174418 |
| 34 | exp "review"/ | 2537949 |
| 35 | exp practice guideline/ | 523038 |
| 36 | Conference Abstract.pt. | 3611803 |
| 37 | study protocol.ti. | 8876 |
| 38 | or/32-37 | 6516884 |
| 39 | 31 not 38 | 2116 |
| 40 | limit 39 to (danish or english or norwegian or swedish) | 2026 |

## PsycInfo

Date of search: 21.10.2019

| **#** | **Searches** | **Results** |
| --- | --- | --- |
| 1 | mdd.mp. | 9961 |
| 2 | depressive disorder*.mp. | 74944 |
| 3 | depression.mp. | 316492 |
| 4 | affective disorder*.mp. | 33672 |
| 5 | trd.mp. | 699 |
| 6 | exp affective disorders/ | 137696 |
| 7 | "depression (emotion)"/ | 25130 |
| 8 | 1 or 2 or 3 or 4 or 5 or 6 or 7 | 344437 |
| 9 | mindfulness/ | 8993 |
| 10 | mindfulness-based interventions/ | 539 |
| 11 | "rumination (cognitive process)"/ | 2147 |
| 12 | cbm.mp. | 1000 |
| 13 | cognitive bias modification.mp. | 376 |
| 14 | attentional bias modification.mp. | 105 |
| 15 | abm.mp. | 322 |
| 16 | attention bias modification.mp. | 184 |
| 17 | cct.mp. | 673 |
| 18 | Cognitive Control Training.mp. | 36 |
| 19 | mbct.mp. | 640 |
| 20 | cnt.mp. | 105 |
| 21 | Concreteness training.mp. | 12 |
| 22 | mct.mp. | 500 |
| 23 | meta cognitive therap*.mp. | 22 |
| 24 | metacognitive therap*.mp. | 235 |
| 25 | rfcbt.mp. | 4 |
| 26 | rf cbt.mp. | 0 |
| 27 | perseverative thinking.mp. | 164 |
| 28 | rnt.mp. | 88 |
| 29 | repetitive negative thinking.mp. | 143 |
| 30 | Mindfulness-based Cognitive Therap*.mp. | 846 |
| 31 | rumination focused.mp. | 22 |
| 32 | or/9-31 | 14386 |
| 33 | 8 and 32 | 4114 |
| 34 | limit 33 to ("0830 systematic review" or 1200 meta analysis) | 180 |
| 35 | exp "literature review"/ | 22667 |
| 36 | treatment guidelines/ | 6560 |
| 37 | limit 33 to ("0200 book" or "0240 authored book" or "0280 edited book") | 287 |
| 38 | study protocol.ti. | 461 |
| 39 | 34 or 35 or 36 or 37 or 38 | 30125 |
| 40 | 33 not 39 | 3635 |
| 41 | limit 40 to (danish or english or norwegian or swedish) | 3389 |

## CINAHL

Date of search: 21.10.2019

| **#** | **Query** | **Limiters/Expanders** | **Results** |
| --- | --- | --- | --- |
| S39 | S30 NOT S37 | Limiters - Language: Danish, English, Norwegian, Swedish  Expanders - Apply equivalent subjects  Search modes - Boolean/Phrase | 845 |
| S38 | S30 NOT S37 | Expanders - Apply equivalent subjects  Search modes - Boolean/Phrase | 860 |
| S37 | S31 OR S32 OR S33 OR S34 OR S35 OR S36 | Expanders - Apply equivalent subjects  Search modes - Boolean/Phrase | 177,266 |
| S36 | TI "study protocol" | Expanders - Apply equivalent subjects  Search modes - Boolean/Phrase | 5,975 |
| S35 | S7 AND S29 | Limiters - Publication Type: Review  Expanders - Apply equivalent subjects  Search modes - Boolean/Phrase | 39 |
| S34 | (MH "Practice Guidelines") | Expanders - Apply equivalent subjects  Search modes - Boolean/Phrase | 69,842 |
| S33 | (MH "Literature Review+") | Expanders - Apply equivalent subjects  Search modes - Boolean/Phrase | 83,430 |
| S32 | (MH "Meta Analysis") | Expanders - Apply equivalent subjects  Search modes - Boolean/Phrase | 40,561 |
| S31 | (MH "Systematic Review") | Expanders - Apply equivalent subjects  Search modes - Boolean/Phrase | 73,894 |
| S30 | S7 AND S29 | Expanders - Apply equivalent subjects  Search modes - Boolean/Phrase | 1,038 |
| S29 | S8 OR S9 OR S10 OR S11 OR S12 OR S13 OR S14 OR S15 OR S16 OR S17 OR S18 OR S19 OR S20 OR S21 OR S22 OR S23 OR S24 OR S25 OR S26 OR S27 OR S28 | Expanders - Apply equivalent subjects  Search modes - Boolean/Phrase | 7,245 |
| S28 | "rumination focused" | Expanders - Apply equivalent subjects  Search modes - Boolean/Phrase | 12 |
| S27 | "Mindfulness-based Cognitive Therap*" | Expanders - Apply equivalent subjects  Search modes - Boolean/Phrase | 318 |
| S26 | (MH "Mindfulness") | Expanders - Apply equivalent subjects  Search modes - Boolean/Phrase | 4,009 |
| S25 | "repetitive negative thinking" | Expanders - Apply equivalent subjects  Search modes - Boolean/Phrase | 44 |
| S24 | rnt | Expanders - Apply equivalent subjects  Search modes - Boolean/Phrase | 39 |
| S23 | "perseverative thinking" | Expanders - Apply equivalent subjects  Search modes - Boolean/Phrase | 22 |
| S22 | "rf cbt" | Expanders - Apply equivalent subjects  Search modes - Boolean/Phrase | 2 |
| S21 | rfcbt | Expanders - Apply equivalent subjects  Search modes - Boolean/Phrase | 2 |
| S20 | "metacognitive therap*" | Expanders - Apply equivalent subjects  Search modes - Boolean/Phrase | 84 |
| S19 | "meta cognitive therap*" | Expanders - Apply equivalent subjects  Search modes - Boolean/Phrase | 8 |
| S18 | mct | Expanders - Apply equivalent subjects  Search modes - Boolean/Phrase | 635 |
| S17 | "Concreteness training" | Expanders - Apply equivalent subjects  Search modes - Boolean/Phrase | 2 |
| S16 | cnt | Expanders - Apply equivalent subjects  Search modes - Boolean/Phrase | 130 |
| S15 | mbct | Expanders - Apply equivalent subjects  Search modes - Boolean/Phrase | 186 |
| S14 | "Cognitive Control Training" | Expanders - Apply equivalent subjects  Search modes - Boolean/Phrase | 12 |
| S13 | cct | Expanders - Apply equivalent subjects  Search modes - Boolean/Phrase | 1,034 |
| S12 | "attention bias modification" | Expanders - Apply equivalent subjects  Search modes - Boolean/Phrase | 76 |
| S11 | abm | Expanders - Apply equivalent subjects  Search modes - Boolean/Phrase | 301 |
| S10 | "attentional bias modification" | Expanders - Apply equivalent subjects  Search modes - Boolean/Phrase | 36 |
| S9 | "cognitive bias modification" | Expanders - Apply equivalent subjects  Search modes - Boolean/Phrase | 140 |
| S8 | cbm | Expanders - Apply equivalent subjects  Search modes - Boolean/Phrase | 740 |
| S7 | S1 OR S2 OR S3 OR S4 OR S5 OR S6 | Search modes - Boolean/Phrase | 156,074 |
| S6 | (MH "Affective Disorders+") | Search modes - Boolean/Phrase | 105,856 |
| S5 | trd | Search modes - Boolean/Phrase | 273 |
| S4 | "affective disorder*" | Search modes - Boolean/Phrase | 9,303 |
| S3 | depression | Search modes - Boolean/Phrase | 148,186 |
| S2 | "depressive disorder*" | Search modes - Boolean/Phrase | 9,346 |
| S1 | mdd | Search modes - Boolean/Phrase | 3,197 |

## The Cochrane Library

Date of search: 21.10.2019


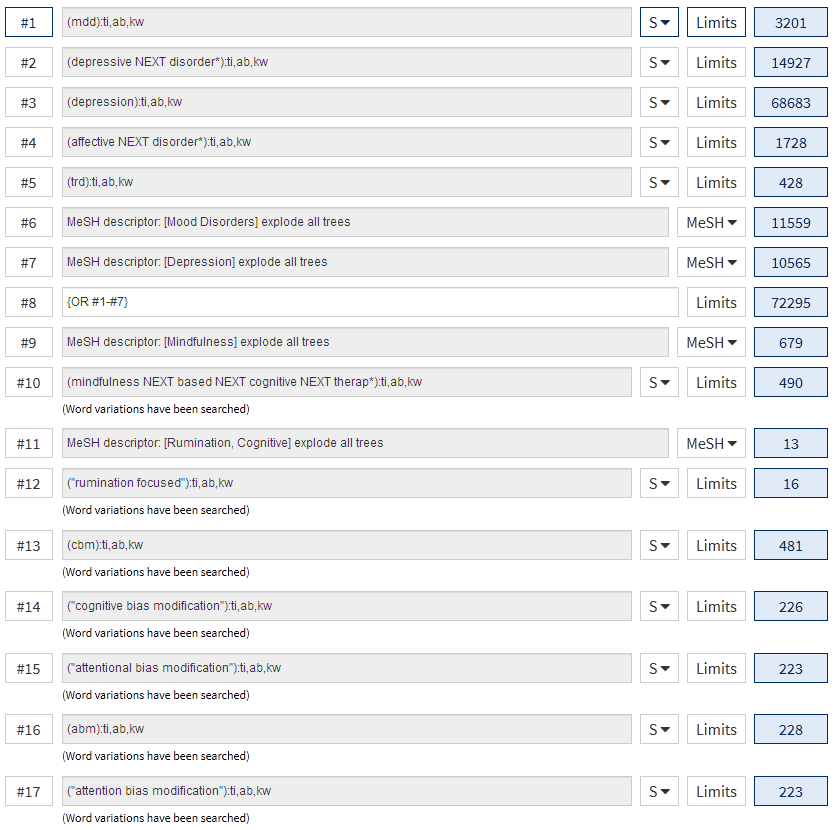


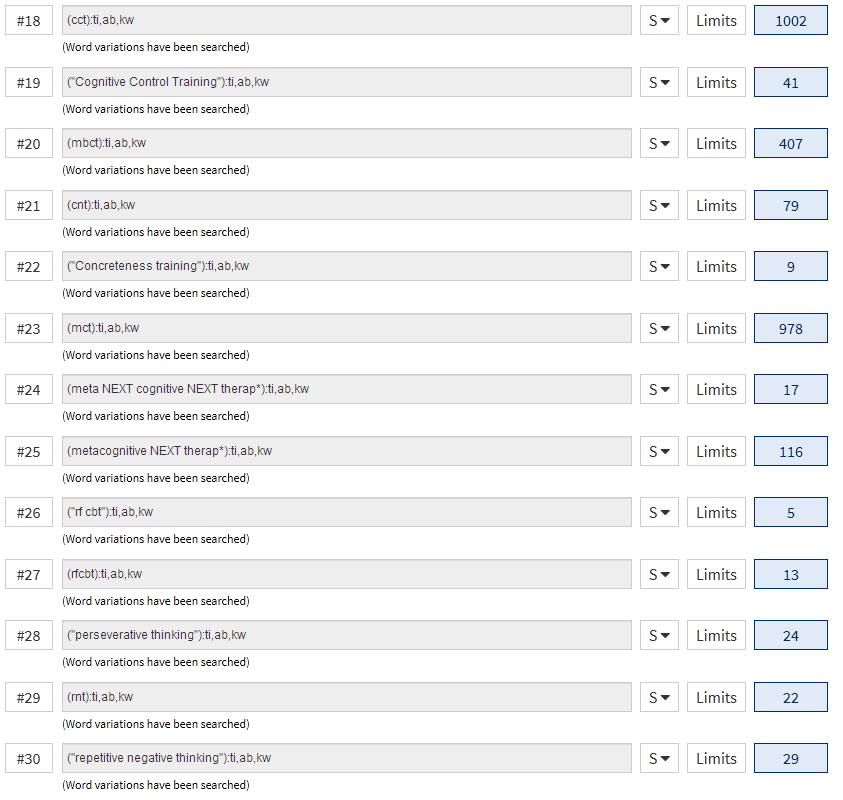


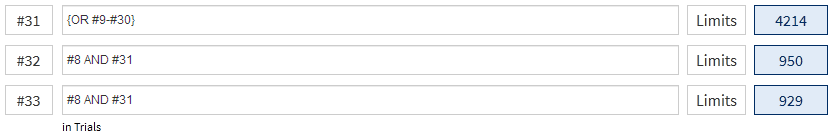


**References in total: 8442. After deduplication: 5378.**

# PICO 6 (cognitive remediation)

## PubMed

Date of search: 20.09.2019

| **Query** | **Items found** |
| --- | --- |
| Search **(((((((((((("Cognitive remediation") OR "Cognitive training") OR "Cognitive rehabilitation") OR "Cognitive enhancement") OR "Cognition training") OR "Cognition" "remediation") OR "Cognition"[tiab] "rehabilitation"[tiab]) OR "Cognition enhancement") OR "Cognitive Remediation"[Mesh])) AND (((((((mdd) OR depressive disorder*) OR "depression") OR affective disorder*) OR trd) OR "Mood Disorders"[Mesh]) OR "Depression"[Mesh]))) NOT ((((((("Systematic Review" [Publication Type]) OR "Meta-Analysis" [Publication Type])))) OR "Review" [Publication Type]) OR "Guideline" [Publication Type])** Filters: **Danish; English; Norwegian; Swedish** | [266](https://www.ncbi.nlm.nih.gov/pubmed/?cmd=HistorySearch&querykey=73) |
| Search **(((((((((((("Cognitive remediation") OR "Cognitive training") OR "Cognitive rehabilitation") OR "Cognitive enhancement") OR "Cognition training") OR "Cognition" "remediation") OR "Cognition"[tiab] "rehabilitation"[tiab]) OR "Cognition enhancement") OR "Cognitive Remediation"[Mesh])) AND (((((((mdd) OR depressive disorder*) OR "depression") OR affective disorder*) OR trd) OR "Mood Disorders"[Mesh]) OR "Depression"[Mesh]))) NOT ((((((("Systematic Review" [Publication Type]) OR "Meta-Analysis" [Publication Type])))) OR "Review" [Publication Type]) OR "Guideline" [Publication Type])** | [269](https://www.ncbi.nlm.nih.gov/pubmed/?cmd=HistorySearch&querykey=68) |
| Search **(((((("Systematic Review" [Publication Type]) OR "Meta-Analysis" [Publication Type])))) OR "Review" [Publication Type]) OR "Guideline" [Publication Type]** | [2646979](https://www.ncbi.nlm.nih.gov/pubmed/?cmd=HistorySearch&querykey=67) |
| Search **(((((((((("Cognitive remediation") OR "Cognitive training") OR "Cognitive rehabilitation") OR "Cognitive enhancement") OR "Cognition training") OR "Cognition" "remediation") OR "Cognition"[tiab] "rehabilitation"[tiab]) OR "Cognition enhancement") OR "Cognitive Remediation"[Mesh])) AND (((((((mdd) OR depressive disorder*) OR "depression") OR affective disorder*) OR trd) OR "Mood Disorders"[Mesh]) OR "Depression"[Mesh])** | [320](https://www.ncbi.nlm.nih.gov/pubmed/?cmd=HistorySearch&querykey=66) |
| Search **(((((((("Cognitive remediation") OR "Cognitive training") OR "Cognitive rehabilitation") OR "Cognitive enhancement") OR "Cognition training") OR "Cognition" "remediation") OR "Cognition"[tiab] "rehabilitation"[tiab]) OR "Cognition enhancement") OR "Cognitive Remediation"[Mesh]** | [2447](https://www.ncbi.nlm.nih.gov/pubmed/?cmd=HistorySearch&querykey=65) |
| Search **"Cognitive Remediation"[Mesh]** | [229](https://www.ncbi.nlm.nih.gov/pubmed/?cmd=HistorySearch&querykey=64) |
| Search **"Cognition enhancement"** | [89](https://www.ncbi.nlm.nih.gov/pubmed/?cmd=HistorySearch&querykey=63) |
| Search **"Cognition"[tiab] "rehabilitation"[tiab]** | [1977](https://www.ncbi.nlm.nih.gov/pubmed/?cmd=HistorySearch&querykey=62) |
| Search **"Cognition" "remediation"** | [994](https://www.ncbi.nlm.nih.gov/pubmed/?cmd=HistorySearch&querykey=61) |
| Search **"Cognition training"** | [46](https://www.ncbi.nlm.nih.gov/pubmed/?cmd=HistorySearch&querykey=60) |
| Search **"Cognitive enhancement"** | [1072](https://www.ncbi.nlm.nih.gov/pubmed/?cmd=HistorySearch&querykey=59) |
| Search **"Cognitive rehabilitation"** | [1700](https://www.ncbi.nlm.nih.gov/pubmed/?cmd=HistorySearch&querykey=58) |
| Search **"Cognitive training"** | [2408](https://www.ncbi.nlm.nih.gov/pubmed/?cmd=HistorySearch&querykey=57) |
| Search **"Cognitive remediation"** | [1161](https://www.ncbi.nlm.nih.gov/pubmed/?cmd=HistorySearch&querykey=56) |
| Search **((((((mdd) OR depressive disorder*) OR "depression") OR affective disorder*) OR trd) OR "Mood Disorders"[Mesh]) OR "Depression"[Mesh]** | [434914](https://www.ncbi.nlm.nih.gov/pubmed/?cmd=HistorySearch&querykey=55) |
| Search **"Depression"[Mesh]** | [111678](https://www.ncbi.nlm.nih.gov/pubmed/?cmd=HistorySearch&querykey=54) |
| Search **"Mood Disorders"[Mesh]** | [117685](https://www.ncbi.nlm.nih.gov/pubmed/?cmd=HistorySearch&querykey=53) |
| Search **trd** | [1442](https://www.ncbi.nlm.nih.gov/pubmed/?cmd=HistorySearch&querykey=51) |
| Search **affective disorder*** | [19396](https://www.ncbi.nlm.nih.gov/pubmed/?cmd=HistorySearch&querykey=50) |
| Search **"depression"** | [382448](https://www.ncbi.nlm.nih.gov/pubmed/?cmd=HistorySearch&querykey=49) |
| Search **depressive disorder*** | [112219](https://www.ncbi.nlm.nih.gov/pubmed/?cmd=HistorySearch&querykey=48) |
| Search **mdd** | [12058](https://www.ncbi.nlm.nih.gov/pubmed/?cmd=HistorySearch&querykey=47) |

## Embase

Date of search: 20.09.2019

| **#** | **Searches** | **Results** |
| --- | --- | --- |
| 1 | mdd.mp. | 18234 |
| 2 | depressive disorder*.mp. | 50945 |
| 3 | depression.mp. | 642040 |
| 4 | affective disorder*.mp. | 24588 |
| 5 | trd.mp. | 2316 |
| 6 | exp mood disorder/ | 491496 |
| 7 | 1 or 2 or 3 or 4 or 5 or 6 | 722001 |
| 8 | Cognitive remediation.mp. | 2151 |
| 9 | Cognitive training.mp. | 3546 |
| 10 | Cognitive rehabilitation.mp. | 3793 |
| 11 | Cognitive enhancement.mp. | 1473 |
| 12 | Cognition training.mp. | 88 |
| 13 | Cognition remediation.mp. | 13 |
| 14 | Cognition rehabilitation.mp. | 14 |
| 15 | Cognition enhancement.mp. | 137 |
| 16 | cognitive remediation therapy/ | 901 |
| 17 | cognitive rehabilitation/ | 2705 |
| 18 | 8 or 9 or 10 or 11 or 12 or 13 or 14 or 15 or 16 or 17 | 10059 |
| 19 | 7 and 18 | 1708 |
| 20 | "systematic review"/ | 220653 |
| 21 | exp meta analysis/ | 172699 |
| 22 | exp "review"/ | 2529783 |
| 23 | exp practice guideline/ | 519192 |
| 24 | Conference Abstract.pt. | 3568219 |
| 25 | 20 or 21 or 22 or 23 or 24 | 6458491 |
| 26 | 19 not 25 | 864 |
| 27 | limit 26 to (danish or english or norwegian or swedish) | 816 |

## PsycInfo

Date of search: 20.09.2019

| **#** | **Searches** | **Results** |
| --- | --- | --- |
| 1 | mdd.mp. | 9864 |
| 2 | depressive disorder*.mp. | 74688 |
| 3 | depression.mp. | 314857 |
| 4 | affective disorder*.mp. | 33548 |
| 5 | trd.mp. | 695 |
| 6 | exp affective disorders/ | 136933 |
| 7 | "depression (emotion)"/ | 25075 |
| 8 | 1 or 2 or 3 or 4 or 5 or 6 or 7 | 342711 |
| 9 | Cognitive remediation.mp. | 1283 |
| 10 | Cognitive training.mp. | 2324 |
| 11 | Cognitive rehabilitation.mp. | 2995 |
| 12 | Cognitive enhancement.mp. | 953 |
| 13 | Cognition training.mp. | 52 |
| 14 | Cognition remediation.mp. | 7 |
| 15 | Cognition rehabilitation.mp. | 6 |
| 16 | Cognition enhancement.mp. | 56 |
| 17 | exp brain training/ | 1632 |
| 18 | cognitive rehabilitation/ | 2263 |
| 19 | 9 or 10 or 11 or 12 or 13 or 14 or 15 or 16 or 17 or 18 | 7789 |
| 20 | 8 and 19 | 1082 |
| 21 | limit 20 to ("0830 systematic review" or 1200 meta analysis) | 32 |
| 22 | exp "literature review"/ | 22634 |
| 23 | treatment guidelines/ | 6521 |
| 24 | limit 20 to ("0200 book" or "0240 authored book" or "0280 edited book") | 98 |
| 25 | 21 or 22 or 23 or 24 | 29270 |
| 26 | 20 not 25 | 951 |
| 27 | limit 26 to (danish or english or norwegian or swedish) | 897 |

## CINAHL

Date of search: 20.09.2019

| **#** | **Query** | **Limiters/Expanders** | **Results** |
| --- | --- | --- | --- |
| S27 | S19 NOT S25 | Limiters - Language: Danish, English, Norwegian, Swedish  Expanders - Apply equivalent subjects  Search modes - Boolean/Phrase | 283 |
| S26 | S19 NOT S25 | Expanders - Apply equivalent subjects  Search modes - Boolean/Phrase | 289 |
| S25 | S20 OR S21 OR S22 OR S23 OR S24 | Expanders - Apply equivalent subjects  Search modes - Boolean/Phrase | 169,951 |
| S24 | S7 AND S18 | Limiters - Publication Type: Review  Expanders - Apply equivalent subjects  Search modes - Boolean/Phrase | 28 |
| S23 | (MH "Practice Guidelines") | Expanders - Apply equivalent subjects  Search modes - Boolean/Phrase | 69,414 |
| S22 | (MH "Literature Review+") | Expanders - Apply equivalent subjects  Search modes - Boolean/Phrase | 82,933 |
| S21 | (MH "Meta Analysis") | Expanders - Apply equivalent subjects  Search modes - Boolean/Phrase | 39,894 |
| S20 | (MH "Systematic Review") | Expanders - Apply equivalent subjects  Search modes - Boolean/Phrase | 73,458 |
| S19 | S7 AND S18 | Expanders - Apply equivalent subjects  Search modes - Boolean/Phrase | 335 |
| S18 | S8 OR S9 OR S10 OR S11 OR S12 OR S13 OR S14 OR S15 OR S16 OR S17 | Expanders - Apply equivalent subjects  Search modes - Boolean/Phrase | 3,667 |
| S17 | (MH "Rehabilitation, Cognitive") | Expanders - Apply equivalent subjects  Search modes - Boolean/Phrase | 1,878 |
| S16 | (MH "Cognitive Remediation") | Expanders - Apply equivalent subjects  Search modes - Boolean/Phrase | 78 |
| S15 | "Cognition enhancement" | Expanders - Apply equivalent subjects  Search modes - Boolean/Phrase | 15 |
| S14 | "Cognition rehabilitation" | Expanders - Apply equivalent subjects  Search modes - Boolean/Phrase | 3 |
| S13 | "Cognition remediation" | Expanders - Apply equivalent subjects  Search modes - Boolean/Phrase | 1 |
| S12 | "Cognition training" | Expanders - Apply equivalent subjects  Search modes - Boolean/Phrase | 20 |
| S11 | "Cognitive enhancement" | Expanders - Apply equivalent subjects  Search modes - Boolean/Phrase | 284 |
| S10 | "Cognitive rehabilitation" | Expanders - Apply equivalent subjects  Search modes - Boolean/Phrase | 1,780 |
| S9 | "Cognitive training" | Expanders - Apply equivalent subjects  Search modes - Boolean/Phrase | 930 |
| S8 | "Cognitive remediation" | Expanders - Apply equivalent subjects  Search modes - Boolean/Phrase | 494 |
| S7 | S1 OR S2 OR S3 OR S4 OR S5 OR S6 | Search modes - Boolean/Phrase | 155,114 |
| S6 | (MH "Affective Disorders+") | Search modes - Boolean/Phrase | 105,223 |
| S5 | trd | Search modes - Boolean/Phrase | 269 |
| S4 | "affective disorder*" | Search modes - Boolean/Phrase | 9,253 |
| S3 | depression | Search modes - Boolean/Phrase | 147,264 |
| S2 | "depressive disorder*" | Search modes - Boolean/Phrase | 9,277 |
| S1 | mdd | Search modes - Boolean/Phrase | 3,177 |

## The Cochrane Library

Date of search: 20.09.2019


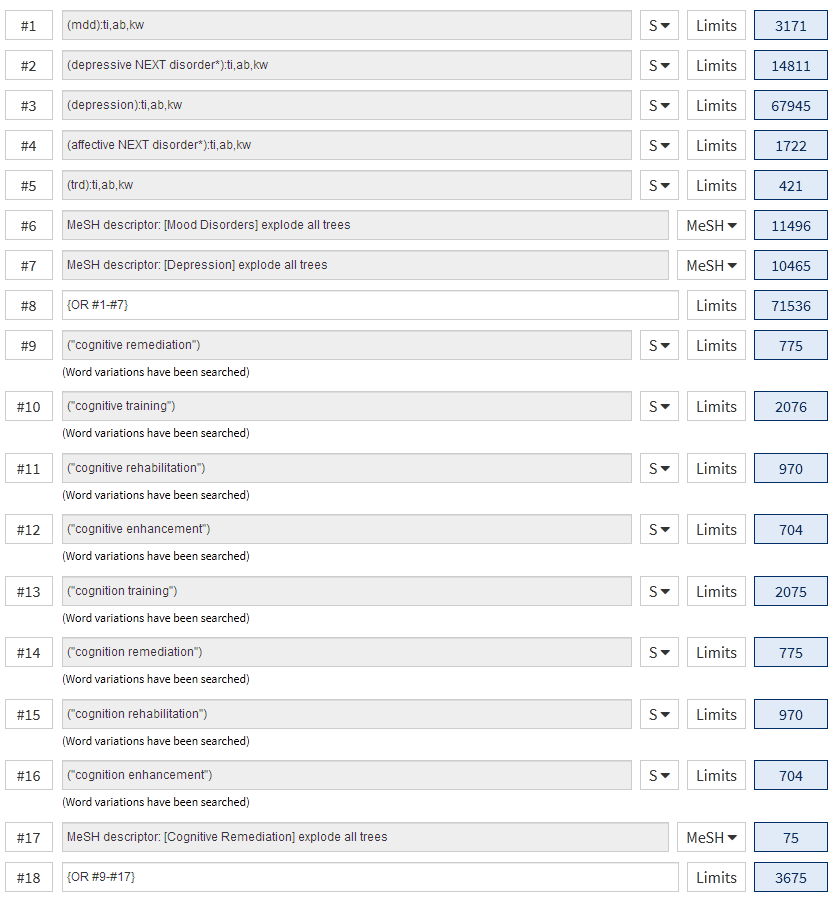


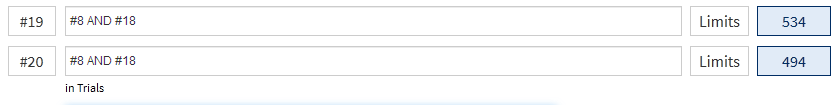


**References in total: 2756. After deduplication: 2025.**
