# Supplementary material
Source: publisher figshare collection journal article supplement (https://tandf.figshare.com/articles/dataset/_/16529476)
Supplement: Supplementary file 1 [file 2]

# rTMS for Treatment resistant depression

## Protocol information

### Authors

[Empty name]<sup>1</sup>

<sup>1</sup>[Empty affiliation]

Citation example: [Empty name]. rTMS for Treatment resistant depression [Protocol]. Cochrane Database of Systematic Reviews [Year], Issue [Issue].

### Contact person

*[Empty name]*

### Dates

|                           |               |
|---------------------------|---------------|
| Assessed as Up-to-date:   |               |
| Date of Search:           |               |
| Next Stage Expected:      |               |
| Protocol First Published: | Not specified |
| Review First Published:   | Not specified |
| Last Citation Issue:      | Not specified |

### What's new

| Date / Event | Description |
|--------------|-------------|
|--------------|-------------|

### History

| Date / Event | Description |
|--------------|-------------|
|--------------|-------------|

## Background

### Description of the condition

### Description of the intervention

### How the intervention might work

### Why it is important to do this review

## Objectives

## **Methods**

### **Criteria for considering studies for this review**

#### ***Types of studies***

#### ***Types of participants***

#### ***Types of interventions***

#### ***Types of outcome measures***

#### **Primary outcomes**

#### **Secondary outcomes**

### **Search methods for identification of studies**

#### ***Electronic searches***

#### ***Searching other resources***

### **Data collection and analysis**

#### ***Selection of studies***

#### ***Data extraction and management***

#### ***Assessment of risk of bias in included studies***

#### ***Measures of treatment effect***

#### ***Unit of analysis issues***

#### ***Dealing with missing data***

#### ***Assessment of heterogeneity***

***Assessment of reporting biases******Data synthesis******Subgroup analysis and investigation of heterogeneity******Sensitivity analysis*****Acknowledgements****Contributions of authors****Declarations of interest****Published notes****Additional tables****Other references****Additional references****Other published versions of this review****Data and analyses****1 rTMS vs placebo**

| Outcome or Subgroup                              | Studies | Participants | Statistical Method              | Effect Estimate   |
|--------------------------------------------------|---------|--------------|---------------------------------|-------------------|
| 1.1 Frafald                                      | 14      | 1040         | Risk Ratio (IV, Random, 95% CI) | 1.11 [0.71, 1.76] |
| 1.2 Sammentrækning/smerter i ansigtsmuskulaturen | 5       | 457          | Risk Ratio (IV, Random, 95% CI) | 2.02 [1.01, 4.04] |
| 1.3 Krampeanfald                                 | 8       | 767          | Risk Ratio (IV, Random, 95% CI) | 0.34 [0.01, 8.13] |
| 1.4 Hovedpine                                    | 3       | 245          | Risk Ratio (IV, Random, 95% CI) | 1.33 [0.89, 1.97] |

**Figures****Figure 1 (Analysis 1.1)**

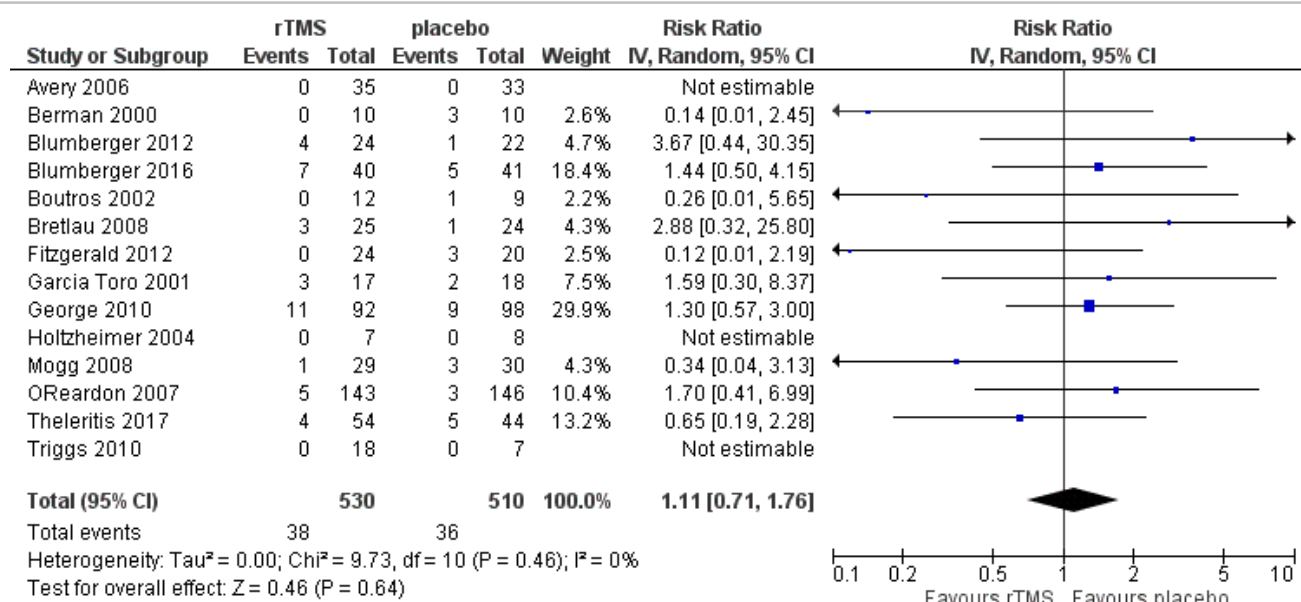

Forest plot of comparison: 1 rTMS vs placebo, outcome: 1.1 Frafald.

**Figure 2 (Analysis 1.2)**

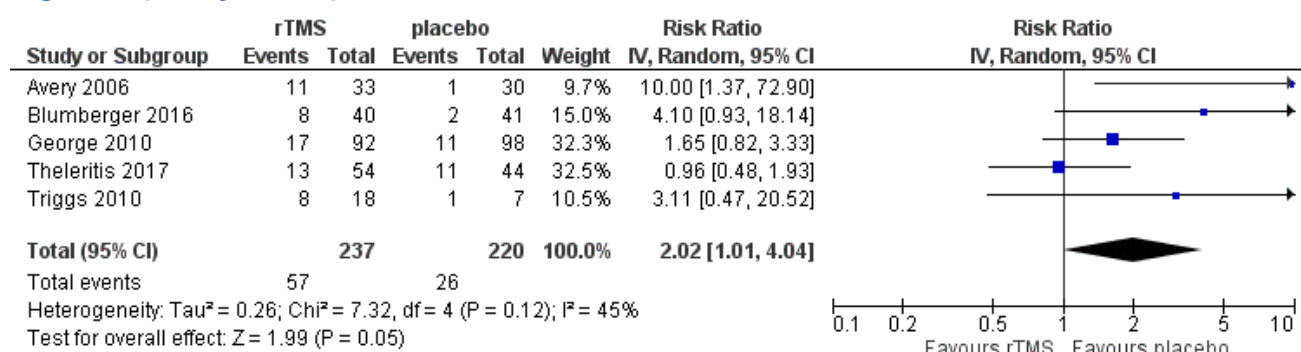

Forest plot of comparison: 1 rTMS vs placebo, outcome: 1.2 Sammentrækning/smerter i ansigtsmuskulaturen.

**Figure 3 (Analysis 1.3)**

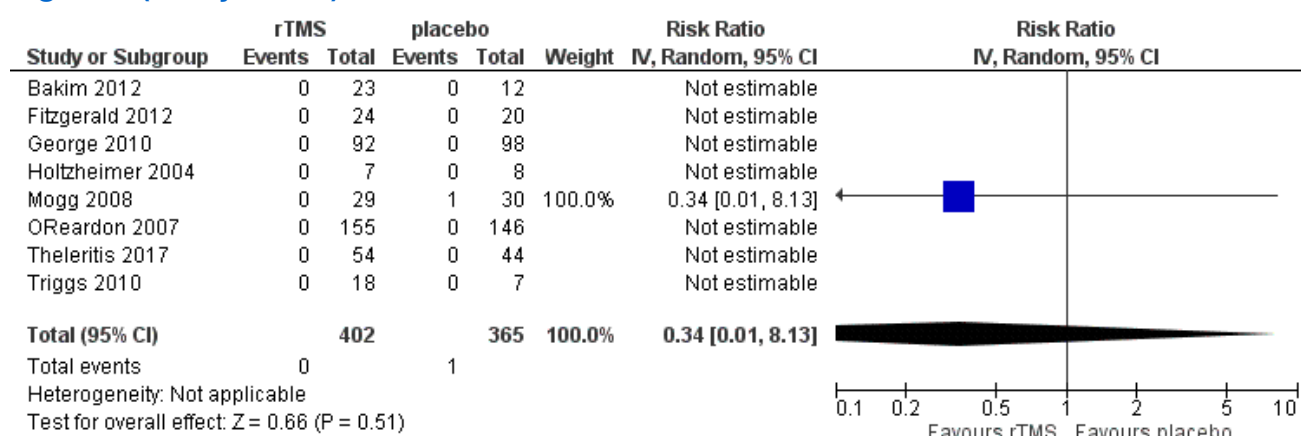

Forest plot of comparison: 1 rTMS vs placebo, outcome: 1.3 Krampeanfald.

**Figure 4 (Analysis 1.4)**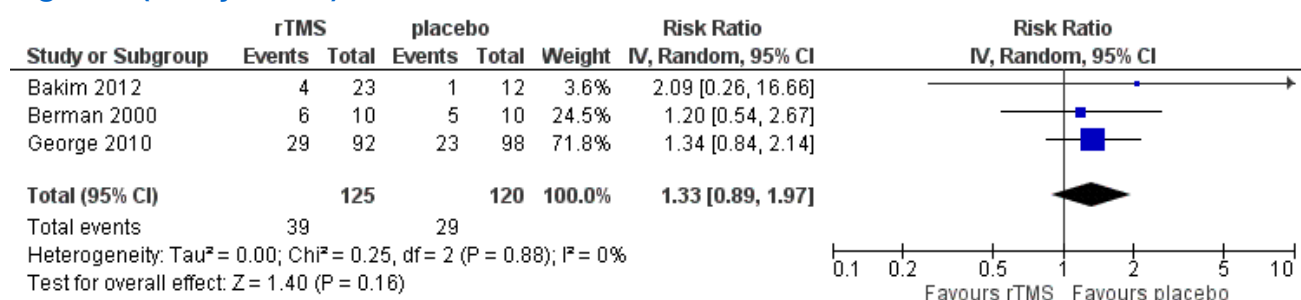

Forest plot of comparison: 1 rTMS vs placebo, outcome: 1.4 Hovedpine.

## Sources of support

### Internal sources

- No sources of support provided

### External sources

- No sources of support provided

## Feedback

## Appendices
