# Supplementary material
Source: publisher figshare collection journal article supplement (https://tandf.figshare.com/articles/dataset/_/16529476)
Supplement: Supplementary file 2 [file 2]

# Rumination-focused therapy for Treatment resistant depression

## Review information

### Authors

[Empty name]<sup>1</sup>

<sup>1</sup>[Empty affiliation]

Citation example: [Empty name]. Rumination-focused therapy for Treatment resistant depression. Cochrane Database of Systematic Reviews [Year], Issue [Issue].

### Contact person

*[Empty name]*

### Dates

|                           |               |
|---------------------------|---------------|
| Assessed as Up-to-date:   |               |
| Date of Search:           |               |
| Next Stage Expected:      |               |
| Protocol First Published: | Not specified |
| Review First Published:   | Not specified |
| Last Citation Issue:      | Not specified |

### What's new

| Date / Event | Description |
|--------------|-------------|
|--------------|-------------|

### History

| Date / Event | Description |
|--------------|-------------|
|--------------|-------------|

## Abstract

### Background

### Objectives

### Search methods

### Selection criteria

### Data collection and analysis

### Main results

## **Authors' conclusions**

## **Plain language summary**

**[Summary title]**

[Summary text]

## **Background**

**Description of the condition**

**Description of the intervention**

**How the intervention might work**

**Why it is important to do this review**

## **Objectives**

## **Methods**

**Criteria for considering studies for this review**

*Types of studies*

*Types of participants*

*Types of interventions*

*Types of outcome measures*

Primary outcomes

Secondary outcomes

**Search methods for identification of studies**

*Electronic searches*

*Searching other resources*

**Data collection and analysis**

*Selection of studies*

*Data extraction and management*

*Assessment of risk of bias in included studies*

*Measures of treatment effect*

*Unit of analysis issues*

*Dealing with missing data*

*Assessment of heterogeneity*

*Assessment of reporting biases*

*Data synthesis*

*Subgroup analysis and investigation of heterogeneity*

*Sensitivity analysis*

**Results**

**Description of studies**

*Results of the search*

*Included studies*

*Excluded studies*

## **Risk of bias in included studies**

*Allocation (selection bias)*

*Blinding (performance bias and detection bias)*

*Incomplete outcome data (attrition bias)*

*Selective reporting (reporting bias)*

*Other potential sources of bias*

**Effects of interventions**

## **Discussion**

**Summary of main results**

**Overall completeness and applicability of evidence**

**Quality of the evidence**

**Potential biases in the review process**

**Agreements and disagreements with other studies or reviews**

## **Authors' conclusions**

**Implications for practice**

**Implications for research**

## **Acknowledgements**

## **Contributions of authors**

## Declarations of interest

## Differences between protocol and review

## Published notes

## Characteristics of studies

### Characteristics of included studies

#### CladderMicus 2018

|                      |                                                                                                                                                                                                                                                                                                                                                                                                                                                                                                                                                                                                                                                                                                                                                                                                                                                                                                                                                                                                                                                                                                                                                                                                                                                                                                                                                                                                                                                                                                                                                                                                                                                                                                                                                                                                                                                                             |
|----------------------|-----------------------------------------------------------------------------------------------------------------------------------------------------------------------------------------------------------------------------------------------------------------------------------------------------------------------------------------------------------------------------------------------------------------------------------------------------------------------------------------------------------------------------------------------------------------------------------------------------------------------------------------------------------------------------------------------------------------------------------------------------------------------------------------------------------------------------------------------------------------------------------------------------------------------------------------------------------------------------------------------------------------------------------------------------------------------------------------------------------------------------------------------------------------------------------------------------------------------------------------------------------------------------------------------------------------------------------------------------------------------------------------------------------------------------------------------------------------------------------------------------------------------------------------------------------------------------------------------------------------------------------------------------------------------------------------------------------------------------------------------------------------------------------------------------------------------------------------------------------------------------|
| <b>Methods</b>       | <b>Study design:</b> Randomized controlled trial<br><b>Study grouping:</b> Parallel group                                                                                                                                                                                                                                                                                                                                                                                                                                                                                                                                                                                                                                                                                                                                                                                                                                                                                                                                                                                                                                                                                                                                                                                                                                                                                                                                                                                                                                                                                                                                                                                                                                                                                                                                                                                   |
| <b>Participants</b>  | <b>Baseline Characteristics</b><br>MBCT + TAU <ul style="list-style-type: none"> <li>● <i>Gender (female):</i></li> </ul> TAU <ul style="list-style-type: none"> <li>● <i>Gender (female):</i></li> </ul> Overall <ul style="list-style-type: none"> <li>● <i>Gender (female):</i> 62%</li> </ul> <p><b>Included criteria:</b> Inclusion criteria were (a) age <math>\geq 18</math>, (b) current depressive episode according to DSM-IV criteria with a duration of <math>\geq 12</math> months, (c) moderate to high levels of depressive symptoms (Inventory of Depressive Symptomatology-Self-Report [IDS-SR] <math>\geq 21</math>), (d) at least one adequate trial of antidepressant medication during the current episode (defined as appropriate doses of antidepressant medication for <math>\geq 4</math> weeks or patient's refusal to use medication contrary to the advice of a psychiatrist), and (e) previous psychological treatment during the current episode (defined as <math>\geq 10</math> sessions of CBT or IPT or <math>&lt; 10</math> sessions if discontinued because of patient's withdrawal).</p> <p><b>Excluded criteria:</b> Exclusion criteria were as follows: (a) current psychotic symptoms; (b) lifetime bipolar disorder; (c) current alcohol or drug dependence; (d) recent electro convulsive therapy (<math>&lt; 3</math> months ago); (e) current somatic disorder partly explaining depressive symptoms; (f) physical, linguistic, cognitive, or intellectual impairments, which might interfere with participation in MBCT or assessments; and (g) previous MBCT training.</p> <p><b>Pretreatment:</b> No group differences in gender, age, level of education, marital status., previous depressive episodes, age of onset, duration of episode, comorbidity, treatment resistance, childhood trauma or depressive symptoms.</p> |
| <b>Interventions</b> | <b>Intervention Characteristics</b><br>MBCT + TAU <ul style="list-style-type: none"> <li>● <i>MBCT was based on the manual by Segal, Williams, and Teasdale.</i> : n = 49</li> <li>● <i>Treatment-as-usual/TAU was a naturalistic condition consisting of:</i> n = 49</li> </ul> TAU <ul style="list-style-type: none"> <li>● <i>MBCT was based on the manual by Segal, Williams, and Teasdale.</i> : n = 57</li> <li>● <i>Treatment-as-usual/TAU was a naturalistic condition consisting of:</i> n = 57</li> </ul>                                                                                                                                                                                                                                                                                                                                                                                                                                                                                                                                                                                                                                                                                                                                                                                                                                                                                                                                                                                                                                                                                                                                                                                                                                                                                                                                                         |
| <b>Outcomes</b>      | <i>Inventory of Depressive Symptoms - Self Report (IDS-SR)</i> <ul style="list-style-type: none"> <li>● <b>Outcome type:</b> Continuous Outcome</li> <li>● <b>Reporting:</b> Fully reported</li> <li>● <b>Scale:</b> 30 items, 3 point and 2 point likert scales</li> <li>● <b>Range:</b> 0-84</li> <li>● <b>Unit of measure:</b> 1</li> </ul>                                                                                                                                                                                                                                                                                                                                                                                                                                                                                                                                                                                                                                                                                                                                                                                                                                                                                                                                                                                                                                                                                                                                                                                                                                                                                                                                                                                                                                                                                                                              |

|                       |                                                                                                                                                                                                                                                                                                                                                                                                                                                                                                                                                                                                                                                                                                                                                                                                                                                                                                                                                                                                                                                                                        |
|-----------------------|----------------------------------------------------------------------------------------------------------------------------------------------------------------------------------------------------------------------------------------------------------------------------------------------------------------------------------------------------------------------------------------------------------------------------------------------------------------------------------------------------------------------------------------------------------------------------------------------------------------------------------------------------------------------------------------------------------------------------------------------------------------------------------------------------------------------------------------------------------------------------------------------------------------------------------------------------------------------------------------------------------------------------------------------------------------------------------------|
|                       | <ul style="list-style-type: none"> <li>● <b>Direction:</b> Lower is better</li> <li>● <b>Data value:</b> Change from baseline</li> </ul> <p><i>Remission</i></p> <ul style="list-style-type: none"> <li>● <b>Outcome type:</b> DichotomousOutcome</li> <li>● <b>Reporting:</b> Fully reported</li> <li>● <b>Scale:</b> depression module of the MINI</li> <li>● <b>Range:</b> na</li> <li>● <b>Unit of measure:</b> 0-1</li> <li>● <b>Direction:</b> Lower is better</li> <li>● <b>Data value:</b> Change from baseline</li> </ul> <p><i>Rumination</i></p> <ul style="list-style-type: none"> <li>● <b>Outcome type:</b> ContinuousOutcome</li> <li>● <b>Reporting:</b> Fully reported</li> <li>● <b>Direction:</b> Lower is better</li> <li>● <b>Data value:</b> Change from baseline</li> </ul> <p><i>Quality of life (WHOQoL-BREF)</i></p> <ul style="list-style-type: none"> <li>● <b>Outcome type:</b> ContinuousOutcome</li> <li>● <b>Reporting:</b> Fully reported</li> <li>● <b>Direction:</b> Higher is better</li> <li>● <b>Data value:</b> Change from baseline</li> </ul> |
| <b>Identification</b> | <p><b>Sponsorship source:</b> Fonds Psychische Gezondheid, Grant/AwardNumber:20116630</p> <p><b>Country:</b> The Netherlands.</p> <p><b>Setting:</b> University Hospital</p> <p><b>Comments:</b></p> <p><b>Authors name:</b> Mira B. Cladder-Micus</p> <p><b>Institution:</b> Behavioural Science Institute, Radboud UniversityNijmegen, Depression Expertise Centre, Pro Persona, Department of Psychiatry, Radboud University</p> <p><b>Email:</b> m.cladder-micus@psych.ru.nl</p> <p><b>Address:</b> Department ofPsychiatry, Radboud UniversityMedical Center,P.O. Box 9101, InternalPostal Code 966, 6500HB, Nijmegen, The Netherlands.</p>                                                                                                                                                                                                                                                                                                                                                                                                                                       |
| <b>Notes</b>          | <p>stine bjerrum moeller on 26/10/2019 01:23</p> <p><b>Select</b></p> <p>Der er anvendt &gt; 1 år for kronisk og 1 præparat, så den smutter faktisk lige igennem vores net, da det enten er 2 år eller 2 præparater</p> <p>stine bjerrum moeller on 03/11/2019 23:12</p> <p><b>Excluded</b></p> <p>Man kunne overveje om den skulle inkluderes?</p> <p>stine bjerrum moeller on 06/11/2019 01:03</p> <p><b>Select</b></p> <p>Vi drøftede denne på arbejdsgruppemøde i går og blev enige om at inkludere</p> <p>krista straarup on 21/11/2019 09:39</p> <p><b>Outcomes</b></p> <p>jeg blev lige i tvivl om det var ITT eller PP analyse .. tog ITT analyse som udgangspunkt</p>                                                                                                                                                                                                                                                                                                                                                                                                         |

## Risk of bias table

| Bias | Authors' judgement | Support for judgement |
|------|--------------------|-----------------------|
|------|--------------------|-----------------------|

|                                                           |           |                                                                                                                                                                                                                                                                                                                                                                                                                                                                                             |
|-----------------------------------------------------------|-----------|---------------------------------------------------------------------------------------------------------------------------------------------------------------------------------------------------------------------------------------------------------------------------------------------------------------------------------------------------------------------------------------------------------------------------------------------------------------------------------------------|
| Random sequence generation (selection bias)               | Low risk  | Judgement Comment: v After completion of the baseline measures, participants were randomized to MBCT + TAU or TAU only by means of a web-based application that was specifically designed for this study by an independent statistician. Randomization was 1:1 to MBCT + TAU or TAU only, stratified for treatment center, and minimized for the severity of depressive symptoms (IDS-SR: 21-31; 32- 39; > 40) and chronicity (1-2 years, $\geq 2$ ears),without using block randomization. |
| Allocation concealment (selection bias)                   | Low risk  | Judgement Comment: web based allocation                                                                                                                                                                                                                                                                                                                                                                                                                                                     |
| Blinding of participants and personnel (performance bias) | High risk | Judgement Comment: Participants and personel are aware of the intervention arm                                                                                                                                                                                                                                                                                                                                                                                                              |
| Blinding of outcome assessment (detection bias)           | High risk | Judgement Comment: With MINI the raters were not blinded for which treatment the patient got.With the self-report measures the patients knows which treatment he got.                                                                                                                                                                                                                                                                                                                       |
| Incomplete outcome data (attrition bias)                  | High risk | Judgement Comment: Posttreatment IDS-SR scores were missing for 10 participants (9.4%, TAU: n=5,MBCT+TAU: n=5).For two patients without posttreatment scores, follow-up scores were used. Same in both arms.Sensitivity analyses were performed by imputing missing data according to the last observation carried forward (LOCF) technique.More data is missing for secondary outcomes, however not accounted for.                                                                         |
| Selective reporting (reporting bias)                      | Low risk  | Judgement Comment: Protocol available: Cladder-Micus et al. BMC Psychiatry (2015) 15:275 DOI 10.1186/s12888-015-0647-y                                                                                                                                                                                                                                                                                                                                                                      |
| Other bias                                                | Low risk  |                                                                                                                                                                                                                                                                                                                                                                                                                                                                                             |

## Footnotes

## Characteristics of excluded studies

**Barnhofer 2009**

|                      |                          |
|----------------------|--------------------------|
| Reason for exclusion | Wrong patient population |
|----------------------|--------------------------|

**Chiesa 2012**

|                      |                          |
|----------------------|--------------------------|
| Reason for exclusion | Wrong patient population |
|----------------------|--------------------------|

**Cladder Micus 2019**

|                      |                |
|----------------------|----------------|
| Reason for exclusion | Wrong outcomes |
|----------------------|----------------|

**Eisendrath 2008**

|                      |                    |
|----------------------|--------------------|
| Reason for exclusion | Wrong study design |
|----------------------|--------------------|

**Eisendrath 2016**

|                      |                  |
|----------------------|------------------|
| Reason for exclusion | Wrong comparator |
|----------------------|------------------|

**Ekkers 2011**

|                      |                          |
|----------------------|--------------------------|
| Reason for exclusion | Wrong patient population |
|----------------------|--------------------------|

**Feldman 2014**

|                      |                  |
|----------------------|------------------|
| Reason for exclusion | Wrong comparator |
|----------------------|------------------|

**Fissler 2017**

|                      |                    |
|----------------------|--------------------|
| Reason for exclusion | Wrong intervention |
|----------------------|--------------------|

**Fryer 2015**

|                      |                |
|----------------------|----------------|
| Reason for exclusion | Wrong outcomes |
|----------------------|----------------|

**Vrijzen 2018**

|                      |                    |
|----------------------|--------------------|
| Reason for exclusion | Wrong intervention |
|----------------------|--------------------|

**Watkins 2011**

|                      |                          |
|----------------------|--------------------------|
| Reason for exclusion | Wrong patient population |
|----------------------|--------------------------|

Footnotes

**Characteristics of studies awaiting classification**

Footnotes

**Characteristics of ongoing studies**

Footnotes

**Summary of findings tables****Additional tables****References to studies****Included studies****CladderMicus 2018**

Cladder-Micus, Mira B.; Speckens, Anne E. M.; Vrijzen, Janna N.; T. Donders, A. Rogier; Becker, Eni S.; Spijker, Jan; Cladder-Micus, Mira B.. Mindfulness-based cognitive therapy for patients with chronic, treatment-resistant depression: A pragmatic randomized controlled trial. *Depression & Anxiety* (1091-4269) 2018;35(10):914-924. [DOI: 10.1002/da.22788]

**Excluded studies****Barnhofer 2009**

Barnhofer, Thorsten; Crane, Catherine; Hargus, Emily; Amarasinghe, Myanthi; Winder, Rosie; Williams, J.. Mindfulness-based cognitive therapy as a treatment for chronic depression: A preliminary study. *Behaviour research and therapy* 2009;47(5):366-373. [DOI: ]

**Chiesa 2012**

Chiesa, A.; Mandelli, L.; Serretti, A.. Mindfulness-based cognitive therapy versus psycho-education for patients with major depression who did not achieve remission following antidepressant treatment: a preliminary analysis. *J Altern Complement Med* 2012;18(8):756-60. [DOI: 10.1089/acm.2011.0407]



**Cladder Micus 2019**

Cladder-Micus, M. B.; Becker, E. S.; Spijker, J.; Speckens, A. E. M.; Vrijzen, J. N.. Effects of Mindfulness-Based Cognitive Therapy on a Behavioural Measure of Rumination in Patients with Chronic, Treatment-Resistant Depression. *Cognit Ther Res* 2019;43(4):666-678. [DOI: ]

**Eisendrath 2008**

Eisendrath, S. J.; Delucchi, K.; Bitner, R.; Fenimore, P.; Smit, M.; McLane, M.. Mindfulness-based cognitive therapy for treatment-resistant depression: a pilot study. *Psychother Psychosom* 2008;77(5):319-20. [DOI: 10.1159/000142525]

**Eisendrath 2016**

Eisendrath, S. J.; Gillung, E.; Delucchi, K. L.; Segal, Z. V.; Nelson, J. C.; McInnes, L. A.; Mathalon, D. H.; Feldman, M. D.. A Randomized Controlled Trial of Mindfulness-Based Cognitive Therapy for Treatment-Resistant Depression. *Psychother Psychosom* 2016;85(2):99-110. [DOI: 10.1159/000442260]

**Ekkers 2011**

Ekkers, Wilfried; Korrelboom, Kees; Huijbrechts, Irma; Smits, Niels; Cuijpers, Pim; van der Gaag, Mark. Competitive Memory Training for treating depression and rumination in depressed older adults: A randomized controlled trial. *Behaviour research and therapy* 2011;49(10):588-596. [DOI: ]

**Feldman 2014**

Feldman, M. D.; Gillung, E. P.; Delucchi, K.; Eisendrath, S. J.. Mindfulness based cognitive therapy versus a health enhancement program for treatment resistant depression: a randomized controlled trial. *Journal of General Internal Medicine* 2014;29:S150-S151. [DOI: ]

**Fissler 2017**

Fissler, M.; Winnebeck, E.; Schroeter, T. A.; Gumbertsbach, M.; Huntenburg, J. M.; Gartner, M.; Barnhofer, T.. Brief training in mindfulness may normalize a blunted error-related negativity in chronically depressed patients. *Cogn Affect Behav Neurosci* 2017;17(6):1164-1175. [DOI: 10.3758/s13415-017-0540-x]

**Fryer 2015**

Fryer, S. L.; Eisendrath, S. J.; Ferri, J.; Segal, Z. V.; Roach, B. J.; Gillung, E.; Mathalon, D. H.. Mindfulness-based cognitive therapy modulates resting state functional brain connectivity in treatment-resistant depression: a randomized controlled study. *Biol Psychiatry* 2015;77(9):161S-. [DOI: ]

**Vrijzen 2018**

Vrijzen, J. N.; Fischer, V. S.; Muller, B. W.; Scherbaum, N.; Becker, E. S.; Rinck, M.; Tendolkar, I.. Cognitive bias modification as an add-on treatment in clinical depression: Results from a placebo-controlled, single-blinded randomized control trial. *J Affect Disord* 2018;238:342-350. [DOI: 10.1016/j.jad.2018.06.025]

**Watkins 2011**

Watkins, E. R.; Mullan, E.; Wingrove, J.; Rimes, K.; Steiner, H.; Bathurst, N.; Eastman, R.; Scott, J.. Rumination-focused cognitive-behavioural therapy for residual depression: phase II randomised controlled trial. *Br J Psychiatry* 2011;199(4):317-22. [DOI: 10.1192/bjp.bp.110.090282]

**Studies awaiting classification****Ongoing studies****Other references****Additional references****Other published versions of this review**

## Data and analyses

### 1 MBCT + TAU vs TAU

| Outcome or Subgroup                                         | Studies | Participants | Statistical Method                        | Effect Estimate      |
|-------------------------------------------------------------|---------|--------------|-------------------------------------------|----------------------|
| 1.1 Inventory of Depressive Symptoms - Self Report (IDS-SR) | 1       | 96           | Std. Mean Difference (IV, Random, 95% CI) | -0.43 [-0.83, -0.02] |
| 1.2 Rumination                                              | 1       | 90           | Std. Mean Difference (IV, Random, 95% CI) | -0.38 [-0.80, 0.05]  |
| 1.3 Quality of life (WHOQoL-BREF)                           | 1       | 90           | Std. Mean Difference (IV, Random, 95% CI) | 0.45 [0.03, 0.88]    |
| 1.4 Remission                                               | 1       | 92           | Risk Ratio (IV, Random, 95% CI)           | 1.58 [0.81, 3.11]    |

## Figures

Figure 1 (Analysis 1.1)

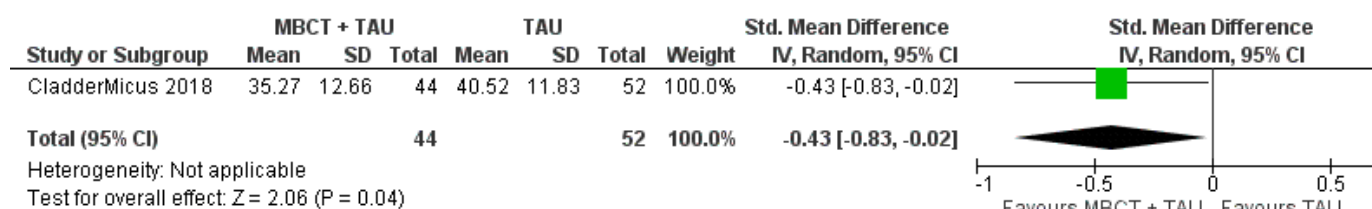

Forest plot of comparison: 1 MBCT + TAU vs TAU, outcome: 1.1 Inventory of Depressive Symptoms - Self Report (IDS-SR).

Figure 2 (Analysis 1.2)

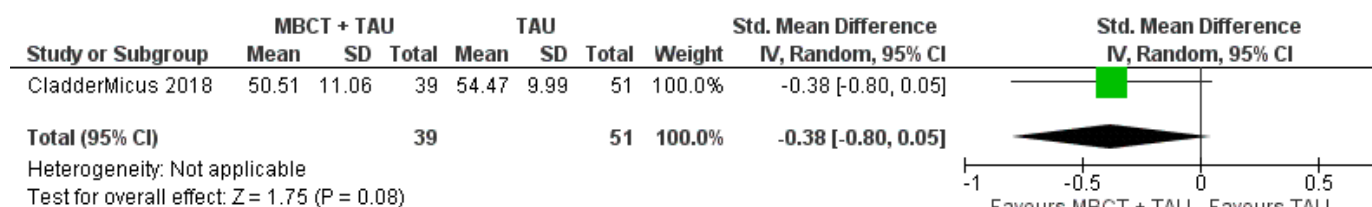

Forest plot of comparison: 1 MBCT + TAU vs TAU, outcome: 1.2 Rumination.

Figure 3 (Analysis 1.3)

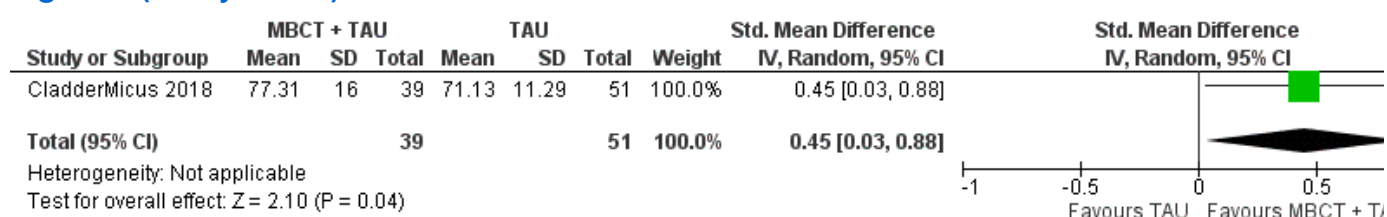

Forest plot of comparison: 1 MBCT + TAU vs TAU, outcome: 1.3 Quality of life (WHOQoL-BREF).

Figure 4 (Analysis 1.4)

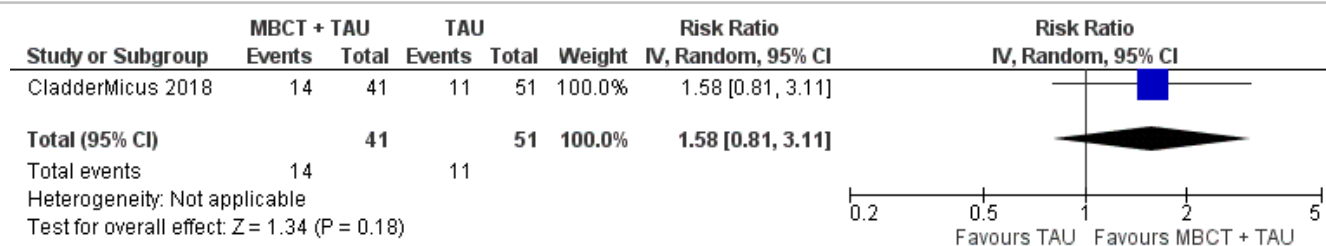

Forest plot of comparison: 1 MBCT + TAU vs TAU, outcome: 1.4 Remission.

## Sources of support

### Internal sources

- No sources of support provided

### External sources

- No sources of support provided

## Feedback

## Appendices
