# Supplementary material
Source: publisher figshare collection journal article supplement (https://tandf.figshare.com/articles/dataset/_/16529476)
Supplement: Supplementary file 3 [file 2]

## Ketamin for Treatment resistant depression

### Review information

#### Authors

[Empty name]<sup>1</sup>

<sup>1</sup>[Empty affiliation]

Citation example: [Empty name]. Ketamin for Treatment resistant depression. Cochrane Database of Systematic Reviews [Year], Issue [Issue].

#### Contact person

[Empty name]

#### Dates

Assessed as Up-to-date:

Date of Search:

Next Stage Expected:

Protocol First Published: Not specified

Review First Published: Not specified

Last Citation Issue: Not specified

#### What's new

| Date / Event | Description |
|--------------|-------------|
|--------------|-------------|

#### History

| Date / Event | Description |
|--------------|-------------|
|--------------|-------------|

### Abstract

#### Background

#### Objectives

#### Search methods

#### Selection criteria

#### Data collection and analysis

#### Main results

#### Authors' conclusions

### Plain language summary

[Summary title]

[Summary text]

## Background

Description of the condition

Description of the intervention

How the intervention might work

Why it is important to do this review

## Objectives

## Methods

Criteria for considering studies for this review

*Types of studies*

*Types of participants*

*Types of interventions*

*Types of outcome measures*

Primary outcomes

Secondary outcomes

Search methods for identification of studies

*Electronic searches*

*Searching other resources*

Data collection and analysis

*Selection of studies*

*Data extraction and management*

*Assessment of risk of bias in included studies*

*Measures of treatment effect*

*Unit of analysis issues*

*Dealing with missing data*

*Assessment of heterogeneity*

*Assessment of reporting biases*

*Data synthesis*

*Subgroup analysis and investigation of heterogeneity*

*Sensitivity analysis*

## **Results**

Description of studies

*Results of the search*

*Included studies*

*Excluded studies*

Risk of bias in included studies

*Allocation (selection bias)*

*Blinding (performance bias and detection bias)*

*Incomplete outcome data (attrition bias)*

*Selective reporting (reporting bias)*

*Other potential sources of bias*

Effects of interventions

## **Discussion**

Summary of main results

## Overall completeness and applicability of evidence

## Quality of the evidence

## Potential biases in the review process

## Agreements and disagreements with other studies or reviews

## Authors' conclusions

## Implications for practice

## Implications for research

## Acknowledgements

## Contributions of authors

## Declarations of interest

## Differences between protocol and review

## Published notes

## Characteristics of studies

## Characteristics of included studies

*Ionescu 2019*

|                     |                                                                                                                                                                                                                                                                                                                                                                                                                                                                                                                                                                                                                                                                                                                                                                                                                                                                                                                                                                                                                                                                                                                                                                                                                                                                                                                                                                                                                                                                                                                                                                                                                                                                                                                                                                                                                                                                                                                           |
|---------------------|---------------------------------------------------------------------------------------------------------------------------------------------------------------------------------------------------------------------------------------------------------------------------------------------------------------------------------------------------------------------------------------------------------------------------------------------------------------------------------------------------------------------------------------------------------------------------------------------------------------------------------------------------------------------------------------------------------------------------------------------------------------------------------------------------------------------------------------------------------------------------------------------------------------------------------------------------------------------------------------------------------------------------------------------------------------------------------------------------------------------------------------------------------------------------------------------------------------------------------------------------------------------------------------------------------------------------------------------------------------------------------------------------------------------------------------------------------------------------------------------------------------------------------------------------------------------------------------------------------------------------------------------------------------------------------------------------------------------------------------------------------------------------------------------------------------------------------------------------------------------------------------------------------------------------|
| <b>Methods</b>      | <b>Study design:</b> Randomized controlled trial<br><b>Study grouping:</b> Parallel group                                                                                                                                                                                                                                                                                                                                                                                                                                                                                                                                                                                                                                                                                                                                                                                                                                                                                                                                                                                                                                                                                                                                                                                                                                                                                                                                                                                                                                                                                                                                                                                                                                                                                                                                                                                                                                 |
| <b>Participants</b> | <b>Baseline Characteristics</b><br>0.5 mg/kg R/S-ketamine hydrochloride (2 infusions pr week for 3 weeks)<br>normal saline (placebo) (2 infusions pr week for 3 weeks)<br>Overall<br><b>Included criteria:</b> (1) 18–65 years old; (2) Primary diagnosis of current major depressive disorder (MDD), based on SCID;(3) HDRS-28 score $\geq 20$ at screening; (4) History of $\geq 3$ failed antidepressant treatment trials of adequate dose and duration during the current episode (ATHQ); (5) SI for $\geq 3$ months (as measured by $\geq 1$ on the Columbia Suicide Severity Rating Scale (C-SSRS) SI score without the requirement for immediate hospitalization, and have a HDRS suicide item score $\geq 2$ (current SI, thoughts of own death) at screening or one of the other two pre-infusion phase visits; (6) Ability to remain on an adequate, stable antidepressant regimen for $\geq 4$ weeks prior to infusions; (7) Ability to secure a reliable adult chaperone after ketamine infusion days; and (8) Maintain a treating psychiatrist in agreement with study participation<br><b>Excluded criteria:</b> (1) pregnancy; (2) unstable medical illness; (3) bipolar disorder; (4) past multiple adverse drug reactions; (4) psychotic illness; (5) substance use disorder within the past year; (6) positive urine toxicology; (7) past history of ketamine abuse; (8) SI requiring immediate hospitalization or indicating immediate risk. In addition, although patients were maintained on their stable outpatient medication regimens prior to the start of the study and during infusions, certain medications were exclusionary due to risk of interactions: St. John's wort, theophylline, tramadol, and any use of illicit narcotics or barbiturates within the previous six months.<br><b>Pretreatment:</b> Placebo group had first depressive episode at a younger age - else no difference |

|                       |                                                                                                                                                                                                                                                                                                                                                                                                                                                                                                                                                                                                                                                                                                                                                                                                                                                                                                                                                                                                                                                                                                                                                                                                                                                                                                                                                                                                                                                                                                                                                                                                                                                                                                                                                                                                                                                                                                                                                                                                                                                                                                                                                                                                                                                                                                                                                                                                                                                                                                                                                                        |
|-----------------------|------------------------------------------------------------------------------------------------------------------------------------------------------------------------------------------------------------------------------------------------------------------------------------------------------------------------------------------------------------------------------------------------------------------------------------------------------------------------------------------------------------------------------------------------------------------------------------------------------------------------------------------------------------------------------------------------------------------------------------------------------------------------------------------------------------------------------------------------------------------------------------------------------------------------------------------------------------------------------------------------------------------------------------------------------------------------------------------------------------------------------------------------------------------------------------------------------------------------------------------------------------------------------------------------------------------------------------------------------------------------------------------------------------------------------------------------------------------------------------------------------------------------------------------------------------------------------------------------------------------------------------------------------------------------------------------------------------------------------------------------------------------------------------------------------------------------------------------------------------------------------------------------------------------------------------------------------------------------------------------------------------------------------------------------------------------------------------------------------------------------------------------------------------------------------------------------------------------------------------------------------------------------------------------------------------------------------------------------------------------------------------------------------------------------------------------------------------------------------------------------------------------------------------------------------------------------|
| <b>Interventions</b>  | <b>Intervention Characteristics</b><br>0.5 mg/kg R/S-ketamine hydrochloride (2 infusions pr week for 3 weeks)<br>normal saline (placebo) (2 infusions pr week for 3 weeks)                                                                                                                                                                                                                                                                                                                                                                                                                                                                                                                                                                                                                                                                                                                                                                                                                                                                                                                                                                                                                                                                                                                                                                                                                                                                                                                                                                                                                                                                                                                                                                                                                                                                                                                                                                                                                                                                                                                                                                                                                                                                                                                                                                                                                                                                                                                                                                                             |
| <b>Outcomes</b>       | <p><i>Depressionssymptomer</i></p> <ul style="list-style-type: none"> <li>● <b>Outcome type:</b> ContinuousOutcome</li> <li>● <b>Reporting:</b> Fully reported</li> <li>● <b>Scale:</b> HDRS</li> <li>● <b>Direction:</b> Lower is better</li> </ul> <p><i>Remission</i></p> <ul style="list-style-type: none"> <li>● <b>Outcome type:</b> DichotomousOutcome</li> <li>● <b>Reporting:</b> Fully reported</li> <li>● <b>Unit of measure:</b> n</li> <li>● <b>Direction:</b> Higher is better</li> <li>● <b>Notes:</b> Defineret som &lt;= 7 HDRS</li> </ul> <p><i>Respons</i></p> <ul style="list-style-type: none"> <li>● <b>Outcome type:</b> DichotomousOutcome</li> <li>● <b>Scale:</b> n</li> <li>● <b>Direction:</b> Higher is better</li> <li>● <b>Data value:</b> Change from baseline</li> <li>● <b>Notes:</b> defineret som &gt;= 50% forbedring i HDRS score</li> </ul> <p><i>Funktionsniveau</i></p> <ul style="list-style-type: none"> <li>● <b>Outcome type:</b> ContinuousOutcome</li> <li>● <b>Reporting:</b> Not reported</li> <li>● <b>Data value:</b> Change from baseline</li> </ul> <p><i>Livskvalitet</i></p> <ul style="list-style-type: none"> <li>● <b>Outcome type:</b> ContinuousOutcome</li> <li>● <b>Reporting:</b> Not reported</li> <li>● <b>Direction:</b> Higher is better</li> </ul> <p><i>Adverse event - indlæggelse</i></p> <ul style="list-style-type: none"> <li>● <b>Outcome type:</b> DichotomousOutcome</li> <li>● <b>Reporting:</b> Partially reported</li> </ul> <p><i>Selvmondsforsøg</i></p> <ul style="list-style-type: none"> <li>● <b>Outcome type:</b> DichotomousOutcome</li> <li>● <b>Reporting:</b> Not reported</li> <li>● <b>Notes:</b> Der rapporteres på selvmordstanker - og give score herfor</li> </ul> <p><i>Misbrug ketamin/eskatemin</i></p> <ul style="list-style-type: none"> <li>● <b>Outcome type:</b> DichotomousOutcome</li> <li>● <b>Reporting:</b> Not reported</li> </ul> <p><i>Øvrige bivirkninger</i></p> <ul style="list-style-type: none"> <li>● <b>Outcome type:</b> DichotomousOutcome</li> <li>● <b>Reporting:</b> Not reported</li> </ul> <p><i>Remission - længste follow up</i></p> <ul style="list-style-type: none"> <li>● <b>Outcome type:</b> DichotomousOutcome</li> <li>● <b>Reporting:</b> Fully reported</li> <li>● <b>Direction:</b> Higher is better</li> </ul> <p><i>Frafald</i></p> <ul style="list-style-type: none"> <li>● <b>Outcome type:</b> DichotomousOutcome</li> <li>● <b>Reporting:</b> Fully reported</li> <li>● <b>Direction:</b> Lower is better</li> </ul> |
| <b>Identification</b> | <p><b>Sponsorship source:</b> This work was supported by the American Foundation for Suicide Prevention (AFSP), the Clinical Research Center at Massachusetts General Hospital, and the Department of Psychiatry, Massachusetts General Hospital, Boston, Massachusetts to Cristina Cusin (P.I.). The project was also funded by grant number 8UL1TR000170-05, Harvard Clinical and Translational Science Center, from the National Center for Advancing Translational Science</p> <p><b>Country:</b> United States of America</p> <p><b>Setting:</b> Out-patient</p> <p><b>Comments:</b> No comment</p> <p><b>Authors name:</b> Dawn F. Ionescu</p> <p><b>Institution:</b> Depression Clinical and Research Program, Department of Psychiatry, Massachusetts General Hospital, Boston, MA, United States</p> <p><b>Email:</b> ccusin@mgh.harvard.edu</p> <p><b>Address:</b> (C.Cusin) Depression Clinical and Research Program, Massachusetts General Hospital, 1 Bowdoin</p>                                                                                                                                                                                                                                                                                                                                                                                                                                                                                                                                                                                                                                                                                                                                                                                                                                                                                                                                                                                                                                                                                                                                                                                                                                                                                                                                                                                                                                                                                                                                                                                         |

|              |                                                                                                                                            |
|--------------|--------------------------------------------------------------------------------------------------------------------------------------------|
|              | Square, 6th Floor, Boston, MA 02114, United States                                                                                         |
| <b>Notes</b> | <p>Claus Sørensen on 11/11/2019 07:42</p> <p><b>Select</b></p> <p>Relevant definition af TRD, relevante data . placebokontrolleret RCT</p> |

## Risk of bias table

| Bias                                                    | Authors' judgement | Support for judgement                                                                                                                                                                                                    |
|---------------------------------------------------------|--------------------|--------------------------------------------------------------------------------------------------------------------------------------------------------------------------------------------------------------------------|
| Allocation concealment                                  | Low risk           | Judgement Comment: patienter, klinikere og rater var blindet.                                                                                                                                                            |
| Sequence generation                                     | Low risk           | Judgement Comment: computer genereret algoritme                                                                                                                                                                          |
| Blinding of participants and personnel for All outcomes | Low risk           | Judgement Comment: patienter, klinikere og rater var blindet                                                                                                                                                             |
| Incomplete outcome data for All outcomes                | Unclear risk       | Judgement Comment: De rapporterer på det de har beskrevet. Både i aktiv og i placebo grupper er det 69% som gennemfører, øvrige dropper ud på et tidspunkt. man har data på 24/26 for første infusion og rating bagefter |
| Selective outcome reporting                             | Low risk           | Judgement Comment: rapporteret data svarer til hvad der beskrives at ville undersøges Der foreligger en protokol som kan rekvireres - ligger ikke på ClinicalTrials.gov                                                  |
| Other sources of bias                                   | Unclear risk       | Judgement Comment: 3 år til inclusion er lang tid. 30% droppet ud indenfor 3 uger. 3/13 i placebo grupper stopper efter første behandling, fordi de troede de fik placebo                                                |
| Blinding of outcome assessors for All outcomes          | Low risk           | Judgement Comment: rater var blindet                                                                                                                                                                                     |

## Singh 2016

|                      |                                                                                                                                                                                                                                                                                                                                                                                                                                                                                                                                                                                                                                                                                                                                                                                                                                                                                                                                                                                                                                                                                                                                                                                                                                                                                                                                                                                                                                                                                                                                                                                               |
|----------------------|-----------------------------------------------------------------------------------------------------------------------------------------------------------------------------------------------------------------------------------------------------------------------------------------------------------------------------------------------------------------------------------------------------------------------------------------------------------------------------------------------------------------------------------------------------------------------------------------------------------------------------------------------------------------------------------------------------------------------------------------------------------------------------------------------------------------------------------------------------------------------------------------------------------------------------------------------------------------------------------------------------------------------------------------------------------------------------------------------------------------------------------------------------------------------------------------------------------------------------------------------------------------------------------------------------------------------------------------------------------------------------------------------------------------------------------------------------------------------------------------------------------------------------------------------------------------------------------------------|
| <b>Methods</b>       | <p><b>Study design:</b> Randomized controlled trial</p> <p><b>Study grouping:</b> Parallel group</p>                                                                                                                                                                                                                                                                                                                                                                                                                                                                                                                                                                                                                                                                                                                                                                                                                                                                                                                                                                                                                                                                                                                                                                                                                                                                                                                                                                                                                                                                                          |
| <b>Participants</b>  | <p><b>Baseline Characteristics</b></p> <p>0.20 mg/kg Esketamine IV single dose</p> <p>0.40 mg/kg Esketamine IV single dose</p> <p>normal saline (placebo) IV single dose</p> <p>Overall</p> <p><b>Included criteria:</b> men and women 18–64 years old who met DSM-IV-TR diagnostic criteria for recurrent MDD without psychotic features, based on clinical assessment and confirmed by the Mini-International Neuropsychiatric Interview. Based on the conventional definition of TRD, patients were required to have had an inadequate response to at least one antidepressant drug in their current depressive episode and an inadequate response to at least one other antidepressant either in their current or in a previous depressive episode, as assessed by the Massachusetts General Hospital Antidepressant Treatment Response Questionnaire. At screening and on day 21, patients were also required to have a total score of at least 34 on the Inventory of Depressive Symptomatology–Clinician Rated, 30-Item (mild, 12–23; moderate, 24–36; severe, 37–46; very severe, 47–84).</p> <p><b>Excluded criteria:</b> Exclusion criteria included any primary DSM-IV-TR diagnosis of active generalized anxiety disorder, panic disorder, obsessive-compulsive disorder, posttraumatic stress disorder, anorexia nervosa, or bulimia nervosa; patients were also excluded if they had been acutely suicidal or homicidal requiring hospitalization in the past 12 months or had a history of previous nonresponse to ketamine or esketamine</p> <p><b>Pretreatment:</b> none</p> |
| <b>Interventions</b> | <p><b>Intervention Characteristics</b></p> <p>0.20 mg/kg Esketamine IV single dose</p> <p>0.40 mg/kg Esketamine IV single dose</p> <p>normal saline (placebo) IV single dose</p>                                                                                                                                                                                                                                                                                                                                                                                                                                                                                                                                                                                                                                                                                                                                                                                                                                                                                                                                                                                                                                                                                                                                                                                                                                                                                                                                                                                                              |
| <b>Outcomes</b>      | <p><i>Depression symptoms</i></p> <ul style="list-style-type: none"> <li>● <b>Outcome type:</b> Continuous Outcome</li> <li>● <b>Reporting:</b> Fully reported</li> <li>● <b>Scale:</b> MADRS</li> <li>● <b>Range:</b> 0–60</li> <li>● <b>Direction:</b> Lower is better</li> <li>● <b>Data value:</b> Change from baseline</li> </ul> <p><i>Response</i></p> <ul style="list-style-type: none"> <li>● <b>Outcome type:</b> Dichotomous Outcome</li> <li>● <b>Reporting:</b> Fully reported</li> <li>● <b>Direction:</b> Higher is better</li> <li>● <b>Data value:</b> Endpoint</li> </ul>                                                                                                                                                                                                                                                                                                                                                                                                                                                                                                                                                                                                                                                                                                                                                                                                                                                                                                                                                                                                   |

|                       |                                                                                                                                                                                                                                                                                                                                                                                                                                                                                                                                                                                                                                                                                                                                                                                                                                                                                                                                                                                                                                                                                                                                                                                                                                                                                                                                                                                                                                                                                                                                                                                                                        |
|-----------------------|------------------------------------------------------------------------------------------------------------------------------------------------------------------------------------------------------------------------------------------------------------------------------------------------------------------------------------------------------------------------------------------------------------------------------------------------------------------------------------------------------------------------------------------------------------------------------------------------------------------------------------------------------------------------------------------------------------------------------------------------------------------------------------------------------------------------------------------------------------------------------------------------------------------------------------------------------------------------------------------------------------------------------------------------------------------------------------------------------------------------------------------------------------------------------------------------------------------------------------------------------------------------------------------------------------------------------------------------------------------------------------------------------------------------------------------------------------------------------------------------------------------------------------------------------------------------------------------------------------------------|
|                       | <p><i>Remission</i></p> <ul style="list-style-type: none"> <li>● <b>Outcome type:</b> DichotomousOutcome</li> <li>● <b>Reporting:</b> Not reported</li> <li>● <b>Data value:</b> Endpoint</li> </ul> <p><i>Funktionsniveau</i></p> <ul style="list-style-type: none"> <li>● <b>Outcome type:</b> ContinuousOutcome</li> <li>● <b>Reporting:</b> Not reported</li> </ul> <p><i>Livskvalitet</i></p> <ul style="list-style-type: none"> <li>● <b>Outcome type:</b> ContinuousOutcome</li> <li>● <b>Reporting:</b> Not reported</li> </ul> <p><i>Adverse event - indlæggelse</i></p> <ul style="list-style-type: none"> <li>● <b>Outcome type:</b> DichotomousOutcome</li> <li>● <b>Reporting:</b> Not reported</li> </ul> <p><i>Adverse event - selvmordsforsøg</i></p> <ul style="list-style-type: none"> <li>● <b>Outcome type:</b> DichotomousOutcome</li> <li>● <b>Reporting:</b> Not reported</li> </ul> <p><i>Øvrige bivirkninger</i></p> <ul style="list-style-type: none"> <li>● <b>Outcome type:</b> DichotomousOutcome</li> <li>● <b>Reporting:</b> Not reported</li> <li>● <b>Data value:</b> Endpoint</li> </ul> <p><i>Misbrug esketamin</i></p> <ul style="list-style-type: none"> <li>● <b>Outcome type:</b> DichotomousOutcome</li> <li>● <b>Reporting:</b> Not reported</li> </ul> <p><i>Frafald</i></p> <ul style="list-style-type: none"> <li>● <b>Outcome type:</b> DichotomousOutcome</li> <li>● <b>Reporting:</b> Fully reported</li> <li>● <b>Data value:</b> Endpoint</li> <li>● <b>Notes:</b> 1 er udgået af aktiv-gruppen grundet AE, men det er ikke muligt at sige hvilken af dem.</li> </ul> |
| <b>Identification</b> | <p><b>Sponsorship source:</b> This work was supported by Janssen Research &amp; Development. We thank Dr. Harry Ma (Janssen Research &amp; Development) for writing assistance. The investigators and the sponsor thank all the patients and their families who took part in this study</p> <p><b>Country:</b> Belgien, Tyskland, Polen - ifl protokol</p> <p><b>Setting:</b> Multicenter out-patient</p> <p><b>Comments:</b> Medicinal industri</p> <p><b>Authors name:</b> Jaskaran B. Singh</p> <p><b>Institution:</b> Janssen Research &amp; Development</p> <p><b>Email:</b> jsingh25@its.jnj.com</p> <p><b>Address:</b> Janssen Research &amp; Development, LLC, 3210 Merryfield Row, San Diego, CA 92121; USA</p>                                                                                                                                                                                                                                                                                                                                                                                                                                                                                                                                                                                                                                                                                                                                                                                                                                                                                               |
| <b>Notes</b>          | <p>Aake Packness on 21/11/2019 19:05</p> <p><b>Study Design</b></p> <p>RCT DB m placebo indtil til 2. randomisering på 4. dagen. Data er relevant for os i perioden med reel placebo - altså 4 dage hvor forløbet er parallelt og før krydsningerne</p> <p>Aake Packness on 25/11/2019 23:14</p> <p><b>Outcomes</b></p> <p>Ikke outcomes på længste follow up på depressionssymptomer eller remission -</p> <p>Claus Sørensen on 27/11/2019 22:57</p> <p><b>Outcomes</b></p> <p>For øvrige bivirkninger er flere perioder blandet sammen. Kan ikke se bivirkninger alene for dobbelt-blind periode</p>                                                                                                                                                                                                                                                                                                                                                                                                                                                                                                                                                                                                                                                                                                                                                                                                                                                                                                                                                                                                                 |

## Risk of bias table

| Bias                                                      | Authors' judgement | Support for judgement                                                                                         |
|-----------------------------------------------------------|--------------------|---------------------------------------------------------------------------------------------------------------|
| Random sequence generation (selection bias)               | Low risk           | Judgement Comment: computer genereret, permutterede blokke.                                                   |
| Allocation concealment (selection bias)                   | High risk          | Judgement Comment: unblinded pharmacist gav behandling og viste hvad pt fik                                   |
| Blinding of participants and personnel (performance bias) | High risk          | Judgement Comment: Fremgår at patienter og investigatorer var blindet. Pharmacist som gav behandling var ikke |

|                                                           |           |                                                                                                                                                                                                                                                                                                                                                                                                                                                                                                                       |
|-----------------------------------------------------------|-----------|-----------------------------------------------------------------------------------------------------------------------------------------------------------------------------------------------------------------------------------------------------------------------------------------------------------------------------------------------------------------------------------------------------------------------------------------------------------------------------------------------------------------------|
| Blinding of participants and personnel (performance bias) | High risk | Judgement Comment: Fremgår at patienter og investigatorer var blindet. Pharmacist som gav behandling var ikke                                                                                                                                                                                                                                                                                                                                                                                                         |
| Blinding of outcome assessment (detection bias)           | Low risk  | Judgement Comment: Behandlingsteam blindet i blindingsfasen (dag 1 og 4) Efter 2. dosering ophører blinding                                                                                                                                                                                                                                                                                                                                                                                                           |
| Blinding of outcome assessment (detection bias)           | Low risk  |                                                                                                                                                                                                                                                                                                                                                                                                                                                                                                                       |
| Incomplete outcome data (attrition bias)                  | High risk | Judgement Comment: flere sekundære outcomes ikke rapporteret, diskrepans mellem primært outcome madrs baseline vs dag 2, og f.eks sekundært outcome cgi-s baseline vs dag 7 af 42 screenet blev 30 randomiseret, 1 udgår grundet bivirkninger3 går ud af åben-fase-forløbet grundet transportproblemer(Jeg kan ikke få flowchart frem der viser bortfaldet fra 42 - til 30). Et eksklusionskriterie er at man ikke tidligere har responderet på ketamin eller eskatemin - hvor mange den gruppe udgør er ikke synligt |
| Incomplete outcome data (attrition bias)                  | High risk | Judgement Comment: flere sekundære outcomes ikke rapporteret, diskrepans mellem primært outcome madrs baseline vs dag 2, og f.eks sekundært outcome cgi-s baseline vs dag 7 af 42 screenet blev 30 randomiseret, 1 udgår grundet bivirkninger3 går ud af åben-fase-forløbet grundet transportproblemer(Jeg kan ikke få flowchart frem der viser bortfaldet fra 42 - til 30). Et eksklusionskriterie er at man ikke tidligere har responderet på ketamin eller eskatemin - hvor mange den gruppe udgør er ikke synligt |
| Selective reporting (reporting bias)                      | High risk | Judgement Comment: flere sekundære outcomes ikke rapporteret                                                                                                                                                                                                                                                                                                                                                                                                                                                          |
| Selective reporting (reporting bias)                      | High risk | Judgement Comment: flere sekundære outcome ikke rapporteret                                                                                                                                                                                                                                                                                                                                                                                                                                                           |
| Other bias                                                | High risk | Judgement Comment: Designet gør kun den indledende del af studiet egnet for os. Det krydsover og eksklusionskriterieret at man ikke tidligere har kunnet tåle ketamin/esketamin - og ikke kan se hvor mange der udelukkes på det kriterium virker mærkelig.Randomiseringen ophører tidligt. Patienter med angstlidelser ikke med, ikke indlagt for suicidalitet seneste 12 mdr. Primær endpoint madrs efter 1 dag. Generaliserbarhed?                                                                                 |
| Other bias                                                | High risk | Judgement Comment: Designet gør kun den indledende del af studiet egnet for os. Det krydsover og eksklusionskriterieret at man ikke tidligere har kunnet tåle ketamin/esketamin - og ikke kan se hvor mange der udelukkes på det kriterium virker mærkelig.Randomiseringen ophører tidligt. Patienter med angstlidelser ikke med, ikke indlagt for suicidalitet seneste 12 mdr. Primær endpoint madrs efter 1 dag. Generaliserbarhed?                                                                                 |

**Singh 2016a**

|                     |                                                                                                                                                                                                                                                                                                                                                                                                                                                                                                                                                                                                                                                                                                                                                                                                                                                                                                                                                                                                                                                                                                                                                                                                                                                                                                                                                                                                                                                                                                                                                                                                                                                                                                                                                                                                                                                                                                                                                          |
|---------------------|----------------------------------------------------------------------------------------------------------------------------------------------------------------------------------------------------------------------------------------------------------------------------------------------------------------------------------------------------------------------------------------------------------------------------------------------------------------------------------------------------------------------------------------------------------------------------------------------------------------------------------------------------------------------------------------------------------------------------------------------------------------------------------------------------------------------------------------------------------------------------------------------------------------------------------------------------------------------------------------------------------------------------------------------------------------------------------------------------------------------------------------------------------------------------------------------------------------------------------------------------------------------------------------------------------------------------------------------------------------------------------------------------------------------------------------------------------------------------------------------------------------------------------------------------------------------------------------------------------------------------------------------------------------------------------------------------------------------------------------------------------------------------------------------------------------------------------------------------------------------------------------------------------------------------------------------------------|
| <b>Methods</b>      | <b>Study design:</b> Randomized controlled trial<br><b>Study grouping:</b> Parallel group                                                                                                                                                                                                                                                                                                                                                                                                                                                                                                                                                                                                                                                                                                                                                                                                                                                                                                                                                                                                                                                                                                                                                                                                                                                                                                                                                                                                                                                                                                                                                                                                                                                                                                                                                                                                                                                                |
| <b>Participants</b> | <p><b>Baseline Characteristics</b></p> <p>Ketamine 3 times a week 0.5 mg/kg IV<br/> Placebo 3 times a week IV<br/> Ketamine 2 times a week 0,5 mg/kg IV<br/> Placebo 2 times a week IV<br/> Overall</p> <p><b>Included criteria:</b> 8 to 64 years of age who met DSM-IV-TR criteria for recurrent major depressive disorder without psychotic features, confirmed by MINI. Additional inclusion criteria were qualifying valid depressive episodes, as assessed with the SAFER criteria (12) (defined as state versus trait, assessability, face validity, ecological validity, and rule of three Ps—pervasive, persistent, and pathological); inadequate response to at least two antidepressants (with at least one antidepressant failure in the current episode), assessed by medication history and the Massachusetts General Hospital Antidepressant Treatment Response Questionnaire(13); and a score <math>\geq 34</math> on the 30-item Inventory of Depressive Symptomatology—Clinician Rated(14, 15) at screening and pre-infusion assessment on day 1. Independent SAFER raters from Massachusetts General Hospital verified that all randomized patients met the SAFER criteria, had treatment-resistant depression documented on the Antidepressant Treatment Response Questionnaire, and manifested the required depression severity.</p> <p><b>Excluded criteria:</b> A primary DSM-IV diagnosis of OCD, PTSD, anorexia nervosa, or bulimia nervosa or a prior history or current diagnosis of a psychotic disorder, bipolar disorder, mental retardation, borderline personality disorder, mood disorder with postpartum onset, or somatoform disorders. Or history of previous non-response of depressive symptoms to ketamine, clinically significant suicidal or homicidal ideation (imminent risk of harm), and substance abuse or dependence within the year preceding the screening visit.</p> <p><b>Pretreatment:</b> Agree</p> |



|                       |                                                                                                                                                                                                                                                                                                                                                                                                                                                                                                                                                                                                                                                                                                                                                                                                                                                                                                                                                                                                                                                                                                                                                                                                                                                                                                                                                                                                                                                                                                                                                                                                                                                                                                                                                                                                                                                                                                                                                                                                                                                                                                                                                                                                                                                                                                                                                      |
|-----------------------|------------------------------------------------------------------------------------------------------------------------------------------------------------------------------------------------------------------------------------------------------------------------------------------------------------------------------------------------------------------------------------------------------------------------------------------------------------------------------------------------------------------------------------------------------------------------------------------------------------------------------------------------------------------------------------------------------------------------------------------------------------------------------------------------------------------------------------------------------------------------------------------------------------------------------------------------------------------------------------------------------------------------------------------------------------------------------------------------------------------------------------------------------------------------------------------------------------------------------------------------------------------------------------------------------------------------------------------------------------------------------------------------------------------------------------------------------------------------------------------------------------------------------------------------------------------------------------------------------------------------------------------------------------------------------------------------------------------------------------------------------------------------------------------------------------------------------------------------------------------------------------------------------------------------------------------------------------------------------------------------------------------------------------------------------------------------------------------------------------------------------------------------------------------------------------------------------------------------------------------------------------------------------------------------------------------------------------------------------|
| <b>Interventions</b>  | <b>Intervention Characteristics</b><br>Ketamine 3 times a week 0.5 mg/kg IV<br>Placebo 3 times a week IV<br>Ketamine 2 times a week 0,5 mg/kg IV<br>Placebo 2 times a week IV                                                                                                                                                                                                                                                                                                                                                                                                                                                                                                                                                                                                                                                                                                                                                                                                                                                                                                                                                                                                                                                                                                                                                                                                                                                                                                                                                                                                                                                                                                                                                                                                                                                                                                                                                                                                                                                                                                                                                                                                                                                                                                                                                                        |
| <b>Outcomes</b>       | <p><i>Depressionssymptomer</i></p> <ul style="list-style-type: none"> <li>● <b>Outcome type:</b> ContinuousOutcome</li> <li>● <b>Reporting:</b> Partially reported</li> <li>● <b>Scale:</b> MADRS</li> <li>● <b>Range:</b> 0 - 50</li> <li>● <b>Unit of measure:</b> interger</li> <li>● <b>Direction:</b> Lower is better</li> <li>● <b>Data value:</b> Change from baseline</li> </ul> <p><i>Remission</i></p> <ul style="list-style-type: none"> <li>● <b>Outcome type:</b> DichotomousOutcome</li> <li>● <b>Scale:</b> n</li> <li>● <b>Direction:</b> Higher is better</li> <li>● <b>Data value:</b> Endpoint</li> <li>● <b>Notes:</b> Remission defineret som MADRS score &lt;=10</li> </ul> <p><i>Respons</i></p> <ul style="list-style-type: none"> <li>● <b>Outcome type:</b> DichotomousOutcome</li> <li>● <b>Reporting:</b> Partially reported</li> <li>● <b>Scale:</b> MADRS</li> <li>● <b>Range:</b> 0- 50</li> <li>● <b>Unit of measure:</b> n</li> <li>● <b>Direction:</b> Higher is better</li> <li>● <b>Data value:</b> Endpoint</li> <li>● <b>Notes:</b> Defineret som antal pt med &gt;= 50 reduktion i symptomscore i MADRS</li> </ul> <p><i>Funktionsniveau</i></p> <ul style="list-style-type: none"> <li>● <b>Outcome type:</b> ContinuousOutcome</li> <li>● <b>Reporting:</b> Not reported</li> </ul> <p><i>Adverse event - indlæggelse</i></p> <ul style="list-style-type: none"> <li>● <b>Outcome type:</b> DichotomousOutcome</li> <li>● <b>Reporting:</b> Not reported</li> <li>● <b>Direction:</b> Lower is better</li> </ul> <p><i>Adverse events - selvmordsforsøg</i></p> <ul style="list-style-type: none"> <li>● <b>Outcome type:</b> DichotomousOutcome</li> <li>● <b>Reporting:</b> Fully reported</li> </ul> <p><i>Misbrug ketamin/esketamin</i></p> <ul style="list-style-type: none"> <li>● <b>Outcome type:</b> DichotomousOutcome</li> <li>● <b>Reporting:</b> Not reported</li> </ul> <p><i>Øvrige bivirkninger</i></p> <ul style="list-style-type: none"> <li>● <b>Outcome type:</b> DichotomousOutcome</li> <li>● <b>Reporting:</b> Fully reported</li> <li>● <b>Data value:</b> Endpoint</li> </ul> <p><i>Frafald</i></p> <ul style="list-style-type: none"> <li>● <b>Outcome type:</b> DichotomousOutcome</li> <li>● <b>Reporting:</b> Fully reported</li> <li>● <b>Data value:</b> Endpoint</li> </ul> |
| <b>Identification</b> | <p><b>Sponsorship source:</b> Janssen Research and Development, which also provided a formal review of the manuscript</p> <p><b>Country:</b> United States of America</p> <p><b>Setting:</b> Outpatient</p> <p><b>Comments:</b> Medical industri</p> <p><b>Authors name:</b> Jaskaran B. Singh</p> <p><b>Institution:</b> Janssen Research and Development, Titusville, N.J. USA</p> <p><b>Email:</b> jsingh25@its.jnj.com</p> <p><b>Address:</b> Janssen Research and Development, Titusville, N.J., and Beerse,Belgium; the Departments of Psychiatry and Neuroscience, Icahn School of Medicine at Mount Sinai, New York, N.Y</p>                                                                                                                                                                                                                                                                                                                                                                                                                                                                                                                                                                                                                                                                                                                                                                                                                                                                                                                                                                                                                                                                                                                                                                                                                                                                                                                                                                                                                                                                                                                                                                                                                                                                                                                 |
| <b>Notes</b>          | <p>Aake Packness on 25/11/2019 22:10</p> <p><b>Outcomes</b></p> <p>Depressionssymptomer længste follow up er ikke relevant, da randomiseringen ophører efter to uger</p> <p>Tilsvarende for Remission længste follow up</p>                                                                                                                                                                                                                                                                                                                                                                                                                                                                                                                                                                                                                                                                                                                                                                                                                                                                                                                                                                                                                                                                                                                                                                                                                                                                                                                                                                                                                                                                                                                                                                                                                                                                                                                                                                                                                                                                                                                                                                                                                                                                                                                          |

## Risk of bias table

| Bias                                                    | Authors' judgement | Support for judgement                                                                                                                                                                                                                                   |
|---------------------------------------------------------|--------------------|---------------------------------------------------------------------------------------------------------------------------------------------------------------------------------------------------------------------------------------------------------|
| Sequence generation                                     | High risk          | Judgement Comment: Det er uklart hvorfor 97 sorteres fra forud for randomiseringen - det er ikke beskrevet - et af eksklusionskriterierne er tidligere manglede respons ved ketamin administration på depressionssymptomer Computergenereret allokering |
| Sequence generation                                     | High risk          |                                                                                                                                                                                                                                                         |
| Blinding of participants and personnel for All outcomes | Low risk           | Judgement Comment: patienter, behandlere og investigatorer var blindet                                                                                                                                                                                  |
| Blinding of outcome assessors for All outcomes          | Low risk           | Judgement Comment: investigatorer var blindet                                                                                                                                                                                                           |
| Incomplete outcome data for All outcomes                | Low risk           | Judgement Comment: Da det kun er dag 1-15 som reelt dobbelt blindt behandling, er de data som skal indgå                                                                                                                                                |
| Selective outcome reporting                             | Low risk           | Judgement Comment: Data synes at svare til beskrivelse i metode                                                                                                                                                                                         |
| Other sources of bias                                   | Unclear risk       | Judgement Comment: pt med OCD, ptsd, spiseforstyrrelse, psykotisk depression, postpartum depression og misbrug indenfor det sidste år ikke med. Betydning for generaliserbarhed                                                                         |
| Allocations concealment                                 | Low risk           | Judgement Comment: patienter, behandlere og investigatorer var blindet                                                                                                                                                                                  |

## Su 2017

|                      |                                                                                                                                                                                                                                                                                                                                                                                                                                                                                                                                                                                                                                                                                                                                                                                                                                                                                                                                                                                                                                                                              |
|----------------------|------------------------------------------------------------------------------------------------------------------------------------------------------------------------------------------------------------------------------------------------------------------------------------------------------------------------------------------------------------------------------------------------------------------------------------------------------------------------------------------------------------------------------------------------------------------------------------------------------------------------------------------------------------------------------------------------------------------------------------------------------------------------------------------------------------------------------------------------------------------------------------------------------------------------------------------------------------------------------------------------------------------------------------------------------------------------------|
| <b>Methods</b>       | <b>Study design:</b> Randomized controlled trial<br><b>Study grouping:</b> Parallel group                                                                                                                                                                                                                                                                                                                                                                                                                                                                                                                                                                                                                                                                                                                                                                                                                                                                                                                                                                                    |
| <b>Participants</b>  | <b>Baseline Characteristics</b><br>0.5 mg/kg R/S-ketamine hydrochloride IV single dose<br>0.2 mg/kg R/S-ketamine hydrochloride IV single dose<br>normal saline (placebo) IV single dose<br>Overall<br><b>Included criteria:</b> DSM IV criteria for major depressive disorder, recurrent without psychotic features on the basis of the MINI, and who had failed to respond to more than two adequate antidepressant trials. The evaluation of the adequacy of prior antidepressant trials and the inadequacy of clinical response was determined on the basis of a semistructured patient interview and review of the medical record.<br><b>Excluded criteria:</b> A history of bipolar disorder, psychotic symptoms, substance dependence other than nicotine, and mild symptoms HAMD-17 score $\geq 18$ at screening or $\geq 13$ before study entry. Patients with active medical disease were excluded on the basis of medical screening that included history, physical examination, laboratory tests<br><b>Pretreatment:</b> NS<br><b>alle taiwanesere:</b> Taiwanese |
| <b>Interventions</b> | <b>Intervention Characteristics</b><br>0.5 mg/kg R/S-ketamine hydrochloride IV single dose<br>0.2 mg/kg R/S-ketamine hydrochloride IV single dose<br>normal saline (placebo) IV single dose                                                                                                                                                                                                                                                                                                                                                                                                                                                                                                                                                                                                                                                                                                                                                                                                                                                                                  |
| <b>Outcomes</b>      | <i>response</i> <ul style="list-style-type: none"> <li>● <b>Outcome type:</b> Dichotomous Outcome</li> <li>● <b>Reporting:</b> Partially reported</li> <li>● <b>Unit of measure:</b> n</li> <li>● <b>Direction:</b> Higher is better</li> <li>● <b>Data value:</b> Endpoint</li> <li>● <b>Notes:</b> Response <math>\geq 50</math> reduktion i HAMD-score. HAMD baseret på telefon interview</li> </ul> <i>Depressionssymptomer</i> <ul style="list-style-type: none"> <li>● <b>Outcome type:</b> Continuous Outcome</li> <li>● <b>Reporting:</b> Fully reported</li> <li>● <b>Scale:</b> HAMD-17</li> <li>● <b>Data value:</b> Endpoint</li> <li>● <b>Notes:</b> Reported as least square means visualiseret i hver sin graf (fig 2)</li> </ul> <i>Remission</i> <ul style="list-style-type: none"> <li>● <b>Outcome type:</b> Dichotomous Outcome</li> <li>● <b>Reporting:</b> Not reported</li> <li>● <b>Direction:</b> Higher is better</li> </ul> <i>Funktionsniveau</i>                                                                                                |

|                       |                                                                                                                                                                                                                                                                                                                                                                                                                                                                                                                                                                                                                                                                                                                                                                                                                                                                                                                                                                                                                                                                                                                                                                                                                                                                                                                                                                                                                                                                                                                                                                                                              |
|-----------------------|--------------------------------------------------------------------------------------------------------------------------------------------------------------------------------------------------------------------------------------------------------------------------------------------------------------------------------------------------------------------------------------------------------------------------------------------------------------------------------------------------------------------------------------------------------------------------------------------------------------------------------------------------------------------------------------------------------------------------------------------------------------------------------------------------------------------------------------------------------------------------------------------------------------------------------------------------------------------------------------------------------------------------------------------------------------------------------------------------------------------------------------------------------------------------------------------------------------------------------------------------------------------------------------------------------------------------------------------------------------------------------------------------------------------------------------------------------------------------------------------------------------------------------------------------------------------------------------------------------------|
|                       | <ul style="list-style-type: none"> <li>● <b>Outcome type:</b> ContinuousOutcome</li> </ul> <p><i>Livskvalitet</i></p> <ul style="list-style-type: none"> <li>● <b>Outcome type:</b> ContinuousOutcome</li> <li>● <b>Reporting:</b> Not reported</li> </ul> <p><i>Adverse events indlæggelse</i></p> <ul style="list-style-type: none"> <li>● <b>Outcome type:</b> DichotomousOutcome</li> <li>● <b>Reporting:</b> Fully reported</li> </ul> <p><i>Adverse event - selvmordsforsøg</i></p> <ul style="list-style-type: none"> <li>● <b>Outcome type:</b> DichotomousOutcome</li> <li>● <b>Reporting:</b> Fully reported</li> </ul> <p><i>Misbrug Ketamin</i></p> <ul style="list-style-type: none"> <li>● <b>Outcome type:</b> DichotomousOutcome</li> <li>● <b>Reporting:</b> Not reported</li> <li>● <b>Notes:</b> Aktiv gruppe rapporteret bivirkninger sammen</li> </ul> <p><i>Øvrige bivirkninger</i></p> <ul style="list-style-type: none"> <li>● <b>Outcome type:</b> DichotomousOutcome</li> <li>● <b>Reporting:</b> Fully reported</li> <li>● <b>Notes:</b> Ketamin-gruppen rapporteres fælles mht bivirkninger - det er ikke muligt at adskille dem</li> </ul> <p><i>Frafald</i></p> <ul style="list-style-type: none"> <li>● <b>Outcome type:</b> DichotomousOutcome</li> <li>● <b>Reporting:</b> Fully reported</li> </ul> <p><i>Depressionssymptomer længste follow up</i></p> <ul style="list-style-type: none"> <li>● <b>Outcome type:</b> ContinuousOutcome</li> <li>● <b>Reporting:</b> Fully reported</li> <li>● <b>Scale:</b> HAMD</li> <li>● <b>Direction:</b> Lower is better</li> </ul> |
| <b>Identification</b> | <p><b>Sponsorship source:</b> No information</p> <p><b>Country:</b> Taiwan</p> <p><b>Setting:</b> Outpatient</p> <p><b>Comments:</b> None</p> <p><b>Authors name:</b> Tung-Ping Su</p> <p><b>Institution:</b> Division of Psychiatry, Faculty of Medicine, National Yang-Ming University, Taipei, Taiwan;</p> <p><b>Email:</b> tomsu0402@gmail.com</p> <p><b>Address:</b> Department of Psychiatry, Taipei Veterans General Hospital, No. 201, Section 2, Shih-Pai Road, Beitou District, Taipei 112, Taiwan</p>                                                                                                                                                                                                                                                                                                                                                                                                                                                                                                                                                                                                                                                                                                                                                                                                                                                                                                                                                                                                                                                                                             |
| <b>Notes</b>          | <p>Aake Packness on 21/11/2019 23:59</p> <p><b>Outcomes</b></p> <p>Der er ikke angivet længste follow up vedr remission</p>                                                                                                                                                                                                                                                                                                                                                                                                                                                                                                                                                                                                                                                                                                                                                                                                                                                                                                                                                                                                                                                                                                                                                                                                                                                                                                                                                                                                                                                                                  |

## Risk of bias table

| Bias                                                    | Authors' judgement | Support for judgement                                                                                                                                                                                                                                                                                            |
|---------------------------------------------------------|--------------------|------------------------------------------------------------------------------------------------------------------------------------------------------------------------------------------------------------------------------------------------------------------------------------------------------------------|
| Allocation concealment                                  | Unclear risk       |                                                                                                                                                                                                                                                                                                                  |
| Sequence generation                                     | High risk          |                                                                                                                                                                                                                                                                                                                  |
| Blinding of participants and personnel for All outcomes | Unclear risk       | Judgement Comment: beskrives dobbelt blindt - ingen angivelse af hvem og hvordan sikret                                                                                                                                                                                                                          |
| Blinding of outcome assessors for All outcomes          | Unclear risk       | Judgement Comment: beskrives dobbelt blindet - ingen angivelse af hvordan blinding er foregået for investigatorene                                                                                                                                                                                               |
| Incomplete outcome data for All outcomes                | Low risk           | Judgement Comment: primært outcome HAMD rapporteret og sekundært outcome rapporteret.                                                                                                                                                                                                                            |
| Selective outcome reporting                             | Unclear risk       | Judgement Comment: Flere post hoc analyser rapporteret, ingen tilfredstillende beskrivelse af primært outcome. Synes i artiklen at blive til HamD efter 4 dage                                                                                                                                                   |
| Other sources of bias                                   | Unclear risk       | Judgement Comment: studiet er på ren kinesisk population. Pt måtte ikke være fysisk syge. Generaliserbarhed Data baseres på HAMD telefon-rated. Rapporteres i clusters - fordi observationsperioden er så kort, antagelig Der rapporteres på response indenfor 24-96 timer efter infusion. Ikke klinisk relevant |

## Footnotes

**Characteristics of excluded studies*****AanHetRotMcharney 2008***

|                      |                           |
|----------------------|---------------------------|
| Reason for exclusion | Wrong type of publication |
|----------------------|---------------------------|

***Bahr 2019***

|                      |                           |
|----------------------|---------------------------|
| Reason for exclusion | Wrong type of publication |
|----------------------|---------------------------|

***Berman 2000***

|                      |                          |
|----------------------|--------------------------|
| Reason for exclusion | Wrong patient population |
|----------------------|--------------------------|

***Canuso 2016***

|                      |                          |
|----------------------|--------------------------|
| Reason for exclusion | Wrong patient population |
|----------------------|--------------------------|

***Canuso 2017***

|                      |                          |
|----------------------|--------------------------|
| Reason for exclusion | Wrong patient population |
|----------------------|--------------------------|

***Canuso 2018***

|                      |                          |
|----------------------|--------------------------|
| Reason for exclusion | Wrong patient population |
|----------------------|--------------------------|

***Chen 2018***

|                      |                |
|----------------------|----------------|
| Reason for exclusion | Wrong outcomes |
|----------------------|----------------|

***Cusin 2012***

|                      |                           |
|----------------------|---------------------------|
| Reason for exclusion | Wrong type of publication |
|----------------------|---------------------------|

***Daly 2015***

|                      |                           |
|----------------------|---------------------------|
| Reason for exclusion | Wrong type of publication |
|----------------------|---------------------------|

***Daly 2018***

|                      |                    |
|----------------------|--------------------|
| Reason for exclusion | Wrong intervention |
|----------------------|--------------------|

***Domany 2019***

|                      |                    |
|----------------------|--------------------|
| Reason for exclusion | Wrong intervention |
|----------------------|--------------------|

***Fava 2018***

|                      |                  |
|----------------------|------------------|
| Reason for exclusion | Wrong comparator |
|----------------------|------------------|

***Fedgchin 2019***

|                      |                    |
|----------------------|--------------------|
| Reason for exclusion | Wrong study design |
|----------------------|--------------------|

***George 2016***

|                      |                          |
|----------------------|--------------------------|
| Reason for exclusion | Wrong patient population |
|----------------------|--------------------------|

***George 2017***

|                      |                          |
|----------------------|--------------------------|
| Reason for exclusion | Wrong patient population |
|----------------------|--------------------------|

***Glvez 2018***

|                      |                    |
|----------------------|--------------------|
| Reason for exclusion | Wrong study design |
|----------------------|--------------------|

**Lapidus 2013**

|                      |                          |
|----------------------|--------------------------|
| Reason for exclusion | Wrong patient population |
|----------------------|--------------------------|

**Lapidus 2014**

|                      |                          |
|----------------------|--------------------------|
| Reason for exclusion | Wrong patient population |
|----------------------|--------------------------|

**Llc 2012**

|                      |                           |
|----------------------|---------------------------|
| Reason for exclusion | Wrong type of publication |
|----------------------|---------------------------|

**Loo 2014**

|                      |                          |
|----------------------|--------------------------|
| Reason for exclusion | Wrong patient population |
|----------------------|--------------------------|

**Loo 2016**

|                      |                          |
|----------------------|--------------------------|
| Reason for exclusion | Wrong patient population |
|----------------------|--------------------------|

**Mathew 2013**

|                      |                    |
|----------------------|--------------------|
| Reason for exclusion | Wrong study design |
|----------------------|--------------------|

**Milak 2017**

|                      |                          |
|----------------------|--------------------------|
| Reason for exclusion | Wrong patient population |
|----------------------|--------------------------|

**Murrough 2012**

|                      |                  |
|----------------------|------------------|
| Reason for exclusion | Wrong comparator |
|----------------------|------------------|

**Murrough 2013**

|                      |                  |
|----------------------|------------------|
| Reason for exclusion | Wrong comparator |
|----------------------|------------------|

**Murrough 2013a**

|                      |                  |
|----------------------|------------------|
| Reason for exclusion | Wrong comparator |
|----------------------|------------------|

**Nash 2017**

|                      |                |
|----------------------|----------------|
| Reason for exclusion | Wrong outcomes |
|----------------------|----------------|

**Perez Esparza 2018**

|                      |                    |
|----------------------|--------------------|
| Reason for exclusion | Wrong study design |
|----------------------|--------------------|

**Phillips 2017**

|                      |                  |
|----------------------|------------------|
| Reason for exclusion | Wrong comparator |
|----------------------|------------------|

**Phillips 2019**

|                      |                  |
|----------------------|------------------|
| Reason for exclusion | Wrong comparator |
|----------------------|------------------|

**Salloum 2020**

|                      |                  |
|----------------------|------------------|
| Reason for exclusion | Wrong comparator |
|----------------------|------------------|

**Sharon 2016**

|                      |                          |
|----------------------|--------------------------|
| Reason for exclusion | Wrong patient population |
|----------------------|--------------------------|

**Singh 2016b**

|                      |                          |
|----------------------|--------------------------|
| Reason for exclusion | Wrong patient population |
|----------------------|--------------------------|

**Sos 2013**

|                             |                          |
|-----------------------------|--------------------------|
| <b>Reason for exclusion</b> | Wrong patient population |
|-----------------------------|--------------------------|

**Wan 2015**

|                             |                    |
|-----------------------------|--------------------|
| <b>Reason for exclusion</b> | Wrong study design |
|-----------------------------|--------------------|

*Footnotes***Characteristics of studies awaiting classification***Footnotes***Characteristics of ongoing studies***Footnotes***Summary of findings tables****Additional tables****References to studies****Included studies****Ionescu 2019**

Ionescu, Dawn F.; Bentley, Kate H.; Eikermann, Matthias; Taylor, Norman; Johnson-Akeju, Oluwaseun; Swee, Michaela B.; Pavone, Kara J.; Petrie, Samuel R.; Dording, Christina; Mischoulon, David; Alpert, Jonathan E.; Brown, Emery N.; Baer, Lee; Nock, Matthew K.; Fava, Maurizio; Cusin, Cristina; Akeju, Oluwaseun. Repeat-dose ketamine augmentation for treatment-resistant depression with chronic suicidal ideation: A randomized, double blind, placebo controlled trial. *Journal of Affective Disorders* 2019;243:516-524. [DOI: 10.1016/j.jad.2018.09.037]

**Singh 2016**

Singh, J. B.; Fedgchin, M.; Daly, E.; Xi, L.; Melman, C.; De Bruecker, G.; Tadic, A.; Sienaert, P.; Wiegand, F.; Manji, H.; et al.. Intravenous Esketamine in Adult Treatment-Resistant Depression: a Double-Blind, Double-Randomization, Placebo-Controlled Study. *Biol Psychiatry* 2016;80(6):424-431. [DOI: 10.1016/j.biopsych.2015.10.018]

**Singh 2016a**

Singh, J. B.; Fedgchin, M.; Daly, E. J.; De Boer, P.; Cooper, K.; Lim, P.; Pinter, C.; Murrough, J. W.; Sanacora, G.; Shelton, R. C.; Kurian, B.; Winokur, A.; Fava, M.; Manji, H.; Drevets, W. C.; Van Nueten, L.. A Double-Blind, Randomized, Placebo-Controlled, Dose-Frequency Study of Intravenous Ketamine in Patients With Treatment-Resistant Depression. *Am J Psychiatry* 2016;173(8):816-26. [DOI: 10.1176/appi.ajp.2016.16010037]

**Su 2017**

Su, Tung-Ping; Chen, Mu-Hong; Li, Cheng-Ta; Lin, Wei-Chen; Hong, Chen-Jee; Gueorguieva, Ralitza; Tu, Pei-Chi; Bai, Ya-Mei; Cheng, Chih-Ming; Krystal, John H.. Dose-related effects of adjunctive ketamine in Taiwanese patients with treatment-resistant depression. *Neuropsychopharmacology* 2017;42(13):2482-2492. [DOI: ]

**Excluded studies****AanHetRotMcharney 2008**

Aan Het Rot Mcharney, D. S.; Mathew, S. J.. Intravenous ketamine for treatment-resistant major depressive disorder. *Primary Psychiatry* 2008;15(4):39-47. [DOI: ]

**Bahr 2019**

Bahr, R.; Lopez, A.; Rey, J. A.. Intranasal esketamine (Spravato<sup>TM</sup>) for use in treatment-resistant depression in conjunction with an oral antidepressant. *P and T* 2019;44(6):340-375. [DOI: ]

**Berman 2000**

Berman, R. M.; Cappiello, A.; Anand, A.; Oren, D. A.; Heninger, G. R.; Charney, D. S.; Krystal, J. H.. Antidepressant effects of ketamine in depressed patients. *Biol Psychiatry* 2000;47(4):351-4. [DOI: 10.1016/s0006-3223(99)00230-9]

**Canuso 2016**

Canuso, C.; Singh, J. B.; Fedgchin, M.; Alphs, L.; Lane, R.; Lim, P.; Pinter, C.; Manji, H.; Drevets, W.. Efficacy and safety of intranasal esketamine for the rapid reduction of symptoms of major depressive disorder, including suicidal ideation, in patients assessed to be at imminent risk for suicide: a proof-of-concept study. *Neuropsychopharmacology* 2016;41:S370-S371. [DOI: 10.1038/npp.2016.241]

**Canuso 2017**

Canuso, C.; Singh, J.; Fedgchin, M.; Alphs, L.; Lane, R.; Lim, P.; Pinter, C.; Manji, H.; Drevets, W.. Persevere: a study of esketamine for the reduction of the symptoms of major depressive disorder, including suicidal ideation, in subjects assessed to be at imminent risk for suicide. *Biol Psychiatry* 2017;81(10):S31-. [DOI: ]

**Canuso 2018**

Canuso, C. M.; Singh, J. B.; Fedgchin, M.; Alphs, L.; Lane, R.; Lim, P.; Pinter, C.; Hough, D.; Sanacora, G.; Manji, H.; Drevets, W. C.. Efficacy and Safety of Intranasal Esketamine for the Rapid Reduction of Symptoms of Depression and Suicidality in Patients at Imminent Risk for Suicide: Results of a Double-Blind, Randomized, Placebo-Controlled Study. *Am J Psychiatry* 2018;175(7):620-630. [DOI: 10.1176/appi.ajp.2018.17060720]

**Chen 2018**

Chen, M. H.; Li, C. T.; Lin, W. C.; Hong, C. J.; Tu, P. C.; Bai, Y. M.; Cheng, C. M.; Su, T. P.. Rapid inflammation modulation and antidepressant efficacy of a low-dose ketamine infusion in treatment-resistant depression: A randomized, double-blind control study. *Psychiatry Res* 2018;269:207-211. [DOI: 10.1016/j.psychres.2018.08.078]

**Cusin 2012**

Cusin, C.. Randomized, Double-blind Ketamine Augmentation in Chronically Suicidal, Treatment-resistant Major Depression. <http://clinicaltrials.gov/show/nct01667926> 2012. [DOI: ]

**Daly 2015**

Daly, E.; Singh, J.; Fedgchin, M.; Cooper, K.; Lim, P.; Melman, C.; Manji, H.; Van Nueten, L.; Shelton, R.; Thase, M.; et al.,. Intranasal esketamine in treatment-resistant depression, a dose response study - double blind and open label extension data. *Neuropsychopharmacology* 2015;40:S340-S341. [DOI: 10.1038/npp.2015.326]

**Daly 2018**

Daly, E. J.; Singh, J. B.; Fedgchin, M.; Cooper, K.; Lim, P.; Shelton, R. C.; Thase, M. E.; Winokur, A.; Van Nueten, L.; Manji, H.; et al.,. Efficacy and Safety of Intranasal Esketamine Adjunctive to Oral Antidepressant Therapy in Treatment-Resistant Depression: a Randomized Clinical Trial. *JAMA Psychiatry* 2018;75(2):139-148. [DOI: 10.1001/jamapsychiatry.2017.3739]

**Domany 2019**

Domany, Y.; Bleich-Cohen, M.; Tarrasch, R.; Meidan, R.; Litvak-Lazar, O.; Stoppleman, N.; Schreiber, S.; Bloch, M.; Hendler, T.; Sharon, H.. Repeated oral ketamine for out-patient treatment of resistant depression: randomised, double-blind, placebo-controlled, proof-of-concept study. *Br J Psychiatry* 2019;214(1):20-26. [DOI: 10.1192/bjp.2018.196]

**Fava 2018**

Fava, M.; Freeman, M. P.; Flynn, M.; Judge, H.; Hoepfner, B. B.; Cusin, C.; Ionescu, D. F.; Mathew, S. J.; Chang, L. C.; Iosifescu, D. V.; Murrough, J.; Debattista, C.; Schatzberg, A. F.; Trivedi, M. H.; Jha, M. K.; Sanacora, G.; Wilkinson, S. T.; Papakostas, G. I.. Double-blind, placebo-controlled, dose-ranging trial of intravenous ketamine as adjunctive therapy in treatment-resistant depression (TRD). *Mol Psychiatry* 2018. [DOI: 10.1038/s41380-018-0256-5]

**Fedgchin 2019**

Fedgchin, M.; Trivedi, M.; Daly, E. J.; Melkote, R.; Lane, R.; Lim, P.; Vitagliano, D.; Blier, P.; Fava, M.; Liebowitz, M.; Ravindran, A.; Gaillard, R.; Amele, H. V. D.; Preskorn, S.; Manji, H.; Hough, D.; Drevets, W. C.; Singh, J. B.. Efficacy and Safety of Fixed-Dose Esketamine Nasal Spray Combined With a New Oral Antidepressant in Treatment-Resistant Depression: Results of a Randomized, Double-Blind, Active-Controlled Study (TRANSFORM-1). *Int J Neuropsychopharmacol* 2019. [DOI: 10.1093/ijnp/pyz039]

**George 2016**

George, D.; Kumar, D.; Hadzi-Pavlovic, D.; Leyden, J.; Wark, H.; Harper, S.; Brodaty, H.; Loo, C.. Randomised controlled trial of ketamine in depressed elderly. *Biol Psychiatry* 2016;79(9):156S-. [DOI: 10.1016/j.biopsych.2016.03.1054]

**George 2017**

George, Duncan; Gálvez, Verónica; Martin, Donel; Kumar, Divya; Leyden, John; Hadzi-Pavlovic, Dusan; Harper, Simon; Brodaty, Henry; Glue, Paul; Taylor, Rohan; Mitchell, Philip B.; Loo, Colleen K.. Pilot Randomized Controlled Trial of Titrated Subcutaneous Ketamine in Older Patients with Treatment-Resistant Depression. *American Journal of Geriatric Psychiatry* 2017;25(11):1199-1209. [DOI: 10.1016/j.jagp.2017.06.007]

**Glvez 2018**

Gálvez, Verónica; Li, Adrienne; Huggins, Christina; Glue, Paul; Martin, Donel; Somogyi, Andrew A.; Alonzo, Angelo; Rodgers, Anthony; Mitchell, Philip B.; Loo, Colleen K.. Repeated intranasal ketamine for treatment-resistant depression - the way to go? Results from a pilot randomised controlled trial. *Journal of Psychopharmacology* 2018;32(4):397-407. [DOI: 10.1177/0269881118760660]

**Lapidus 2013**

Lapidus, K. A.; Levitch, C. F.; Soleimani, L.; Perez, A. M.; Brallier, J. W.; Parides, M. K.; Iosifescu, D. V.; Charney, D. S.; Murrough, J. W.. Intranasal ketamine in treatment-resistant depression. *Neuropsychopharmacology*. 2013;38:S361. [DOI: 10.1038/npp.2013.280]

**Lapidus 2014**

Lapidus, K. A. B.; Levitch, C.; Perez, A. M.; Brallier, J.; Parides, M. K.; Soleimani, L.; Feder, A.; Iosifescu, D. V.; Charney, D. S.; Murrough, J. W.. A randomized controlled trial of intranasal ketamine in treatment resistant major depression. *Biol Psychiatry* 2014;75(9):44S-. [DOI: 10.1016/j.biopsych.2014.03.014]

**Llc 2012**

Llc,. A Double-blind, Randomized, Placebo-controlled, Parallel Group, Dose Frequency Study of Ketamine in Subjects With Treatment-resistant Depression. <http://clinicaltrials.gov/show/nct01627782> 2012. [DOI: ]

**Loo 2014**

Loo, C. K.; Galvez, V.; O'Keefe, E.; Glue, P.; Somogyi, A.; Shannon-Weickert, C.. Ketamine as an antidepressant: investigating new methods of administration. *Biological Psychiatry*. 2014;75(9 SUPPL. 1):129S. [DOI: 10.1016/j.biopsych.2014.03.014]

**Loo 2016**

Loo, C.; Galvez, V.; O'Keefe, E.; Mitchell, P.; Hadzi-Pavlovic, D.; Leyden, J.; Harper, S.; Somogyi, A.; Lai, R.; Weickert, C.; Glue, P.. Placebo-controlled pilot trial testing dose titration and intravenous, intramuscular and subcutaneous routes for ketamine in depression. *Acta Psychiatrica Scandinavica* 2016;134(1):48-56. [DOI: ]

**Mathew 2013**

Mathew, S. J.. Ketamine and NMDA receptor modulation for treatment-resistant mood disorders. *Behavioural Pharmacology* 2013;24:e8-e9. [DOI: 10.1097/01.fbp.0000434711.14507.49]

**Milak 2017**

Milak, M. S.. A randomized, double-blind, dose finding study of ketamine's antidepressant effect in major depressive disorder. *Neuropsychopharmacology* 2017;43:S6-. [DOI: 10.1038/npp.2017.263]

**Murrough 2012**

Murrough, J. W.; Iosifescu, D. V.; Chang, L. C.; Al Jurdi, R. K.; Green, C. M.; Iqbal, S.; Pillemer, S.; Perez, A. M.; Foulkes, A.; Shah, A.; et al.. Antidepressant efficacy of ketamine in treatment-resistant major depression: a two-site, randomized, parallel-arm, midazolam-controlled, clinical trial. *Neuropsychopharmacology* 2012;38:S151-S152. [DOI: 10.1038/npp.2012.219]

**Murrough 2013**

Murrough, J. W.; Iosifescu, D. V.; Chang, L. C.; Al Jurdi, R. K.; Green, C. E.; Perez, A. M.; Iqbal, S.; Pillemer, S.; Foulkes, A.; Shah, A.; et al.. Antidepressant efficacy of ketamine in treatment-resistant major depression: a two-site randomized controlled trial. *American Journal of Psychiatry* 2013;170(10):1134-1142. [DOI: 10.1176/appi.ajp.2013.13030392]

**Murrough 2013a**

Murrough, J. W.; Iosifescu, D. V.; Chang, L.; Al Jurdi, R. K.; Green, C.; Perez, A.; Iqbal, S. Z.; Pillemer, S.; Foulkes, A.; Mathew, S.. Antidepressant efficacy of ketamine in treatment-resistant major depression: a two-site, randomised controlled trial. *European Neuropsychopharmacology* 2013;23:S411-S412. [DOI: 10.1016/S0924-977X(13)70651-5]

**Nash 2017**

Nash, A.; Shawi, M.; Singh, J. B.; Daly, E.; Cooper, K.; Lim, P.; Lane, R.; Gogate, J.; DiBernardo, A.; Hough, D.; et al.. Improvement in disease severity in patients with treatment resistant depression following treatment with intranasal esketamine. *Neuropsychopharmacology* 2017;43:S522-. [DOI: 10.1038/npp.2017.266]

**Perez Esparza 2018**

Perez-Esparza, R.; Corona, T.; Ruiz-Garcia, R. G.; Onate-Cadena, N.; de la Fuente-Sandoval, C.; Ramirez-Bermudez, J.. Time until relapse after augmentation with single-dose ketamine in treatment-resistant depression. *Psychiatry and Clinical Neurosciences* 2018;72(8):623. [DOI: ]

**Phillips 2017**

Phillips, J.; Birmingham, M.; Hatchard, T.; Norris, S.; Talbot, J.; Ortiz, A.; Blier, P.. Acute and prolonged antidepressant effects of ketamine in treatment-resistant depression. *Neuropsychopharmacology* 2017;43:S189-S190. [DOI: 10.1038/npp.2017.264]

**Phillips 2019**

Phillips, J. L.; Norris, S.; Talbot, J.; Birmingham, M.; Hatchard, T.; Ortiz, A.; Owoeye, O.; Batten, L. A.; Blier, P.. Single, Repeated, and Maintenance Ketamine Infusions for Treatment-Resistant Depression: A Randomized Controlled Trial. *Am J Psychiatry* 2019;176(5):401-409. [DOI: 10.1176/appi.ajp.2018.18070834]

**Salloum 2020**

Salloum, N. C.; Fava, M.; Hock, R. S.; Freeman, M. P.; Flynn, M.; Hoepfner, B.; Cusin, C.; Iosifescu, D. V.; Trivedi, M. H.; Sanacora, G.; Mathew, S. J.; Debattista, C.; Ionescu, D. F.; Papakostas, G. I.. Time to relapse after a single administration of intravenous ketamine augmentation in unipolar treatment-resistant depression. *J Affect Disord* 2020;260:131-139. [DOI: 10.1016/j.jad.2019.09.017]



**Sharon 2016**

Sharon, H.. Oral ketamine for treatment resistant major depression-a double blind randomized controlled trial. *Biol Psychiatry* 2016;79(9):133S-134S. [DOI: 10.1016/j.biopsych.2016.03.1748]

**Singh 2016b**

Singh, J.. Efficacy, safety, dose response and sustained effect of esketamine in treatment resistant depression (TRD). *Neuropsychopharmacology* 2016;41:S105-S106. [DOI: 10.1038/npp.2016.239]

**Sos 2013**

Sos, P.; Khirova, M.; Novak, T.; Kohutova, B.; Horacek, J.; Palenicek, T.. Relationship of ketamine's antidepressant and psychotomimetic effects in unipolar depression. *Neuro Endocrinol Lett* 2013;34(4):287-93. [DOI: ]

**Wan 2015**

Wan, Le-Ben; Levitch, Cara F.; Perez, Andrew M.; Brallier, Jess W.; Iosifescu, Dan V.; Chang, Lee C.; Foulkes, Alexandra; Mathew, Sanjay J.; Charney, Dennis S.; Murrough, James W.. Ketamine safety and tolerability in clinical trials for treatment-resistant depression. *The Journal of clinical psychiatry* 2015;76(3):247-252. [DOI: ]

**Studies awaiting classification****Ongoing studies****Other references****Additional references****Other published versions of this review****Data and analyses****1 IV Ketamin/esketamine versus placebo**

| Outcome or Subgroup                     | Studies | Participants | Statistical Method                        | Effect Estimate      |
|-----------------------------------------|---------|--------------|-------------------------------------------|----------------------|
| 1.1 Depressive symptoms, acute phase    | 2       | 101          | Std. Mean Difference (IV, Random, 95% CI) | -0.62 [-1.59, 0.34]  |
| 1.2 Response, acute phase               | 2       | 101          | Risk Ratio (IV, Random, 95% CI)           | 4.17 [1.49, 11.65]   |
| 1.3 Depressive symptoms, subacute phase | 2       | 76           | Std. Mean Difference (IV, Random, 95% CI) | -1.09 [-2.27, 0.10]  |
| 1.3.1 IV 3 times a week                 | 1       | 29           | Std. Mean Difference (IV, Random, 95% CI) | -2.20 [-3.15, -1.25] |
| 1.3.2 IV 2 times a week                 | 2       | 47           | Std. Mean Difference (IV, Random, 95% CI) | -0.57 [-1.66, 0.53]  |
| 1.4 Response, subacute phase            | 2       | 82           | Risk Ratio (IV, Random, 95% CI)           | 2.74 [0.64, 11.68]   |
| 1.4.1 IV 3 times a week                 | 1       | 29           | Risk Ratio (IV, Random, 95% CI)           | 8.62 [1.21, 61.37]   |
| 1.4.2 IV 2 times a week                 | 2       | 53           | Risk Ratio (IV, Random, 95% CI)           | 1.81 [0.32, 10.42]   |
| 1.5 Remission, subacute phase           | 2       | 82           | Risk Ratio (IV, Random, 95% CI)           | 4.04 [1.07, 15.21]   |
| 1.5.1 IV 3 times a week                 | 1       | 29           | Risk Ratio (IV, Random, 95% CI)           | 8.50 [0.48, 151.05]  |
| 1.5.2 IV 2 times a week                 | 2       | 53           | Risk Ratio (IV, Random, 95% CI)           | 3.31 [0.74, 14.72]   |
| 1.6 Adverse events indlæggelse          | 2       | 97           | Risk Ratio (IV, Random, 95% CI)           | 0.33 [0.01, 7.50]    |
| 1.7 Adverse event - selvmordsforsøg     | 2       | 138          | Risk Ratio (IV, Random, 95% CI)           | 2.68 [0.12, 61.58]   |
| 1.7.1 IV 3 times a week                 | 1       | 33           | Risk Ratio (IV, Random, 95% CI)           | Not estimable        |
| 1.7.2 Single dose                       | 1       | 71           | Risk Ratio (IV, Random, 95% CI)           | Not estimable        |
| 1.7.3 IV 2 times a week                 | 1       | 34           | Risk Ratio (IV, Random, 95% CI)           | 2.68 [0.12, 61.58]   |
| 1.8 Øvrige bivirkninger                 | 2       | 138          | Risk Ratio (IV, Random, 95% CI)           | 1.54 [1.07, 2.21]    |
| 1.8.1 Single dose                       | 1       | 71           | Risk Ratio (IV, Random, 95% CI)           | 6.77 [0.40, 115.37]  |
| 1.8.2 IV 3 times a week                 | 1       | 33           | Risk Ratio (IV, Random, 95% CI)           | 1.53 [0.88, 2.67]    |
| 1.8.3 IV 2 times a week                 | 1       | 34           | Risk Ratio (IV, Random, 95% CI)           | 1.48 [0.92, 2.39]    |

|                         |   |     |                                 |                     |
|-------------------------|---|-----|---------------------------------|---------------------|
| 1.9 Frafald             | 4 | 194 | Risk Ratio (IV, Random, 95% CI) | 1.09 [0.46, 2.59]   |
| 1.9.1 Single dose       | 2 | 101 | Risk Ratio (IV, Random, 95% CI) | 1.57 [0.07, 35.46]  |
| 1.9.2 IV 3 times a week | 1 | 33  | Risk Ratio (IV, Random, 95% CI) | 8.50 [0.49, 146.29] |
| 1.9.3 IV 2 times a week | 2 | 60  | Risk Ratio (IV, Random, 95% CI) | 0.84 [0.33, 2.17]   |

## Figures

Figure 1 (Analysis 1.1)

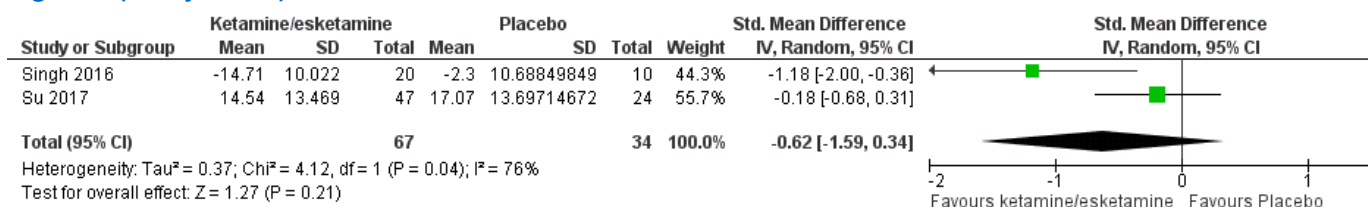

Forest plot of comparison: 13 Ketamin versus placebo, outcome: 13.1 Depressive symptoms, acute phase.

Figure 2 (Analysis 1.2)

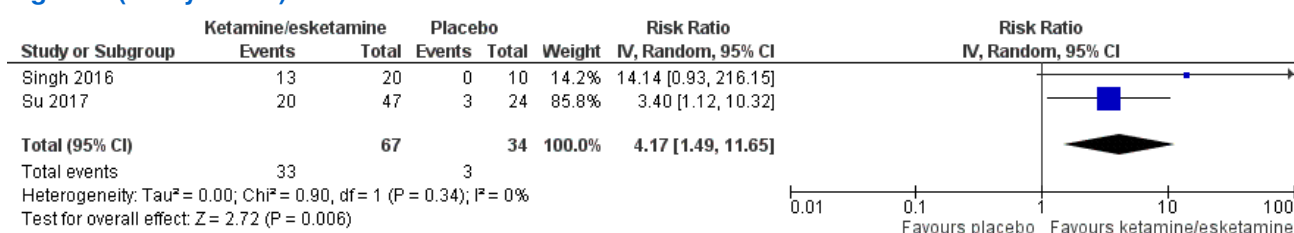

Forest plot of comparison: 13 IV Ketamin versus placebo, outcome: 13.2 Response, acute phase.

Figure 3 (Analysis 1.3)

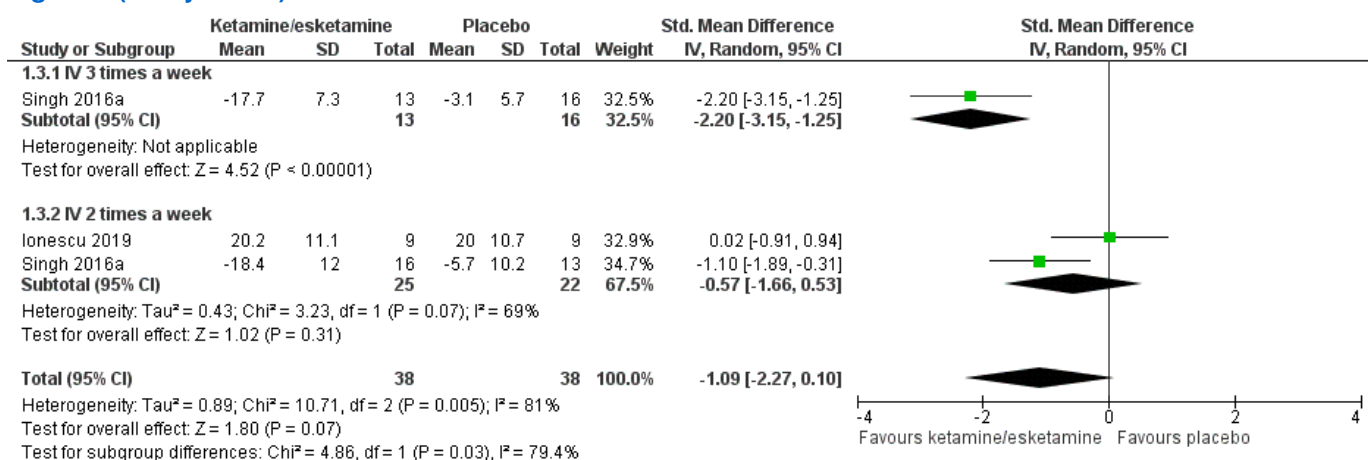

Forest plot of comparison: 13 IV Ketamin versus placebo, outcome: 13.3 Depressive symptoms, subacute phase.

Figure 4 (Analysis 1.4)

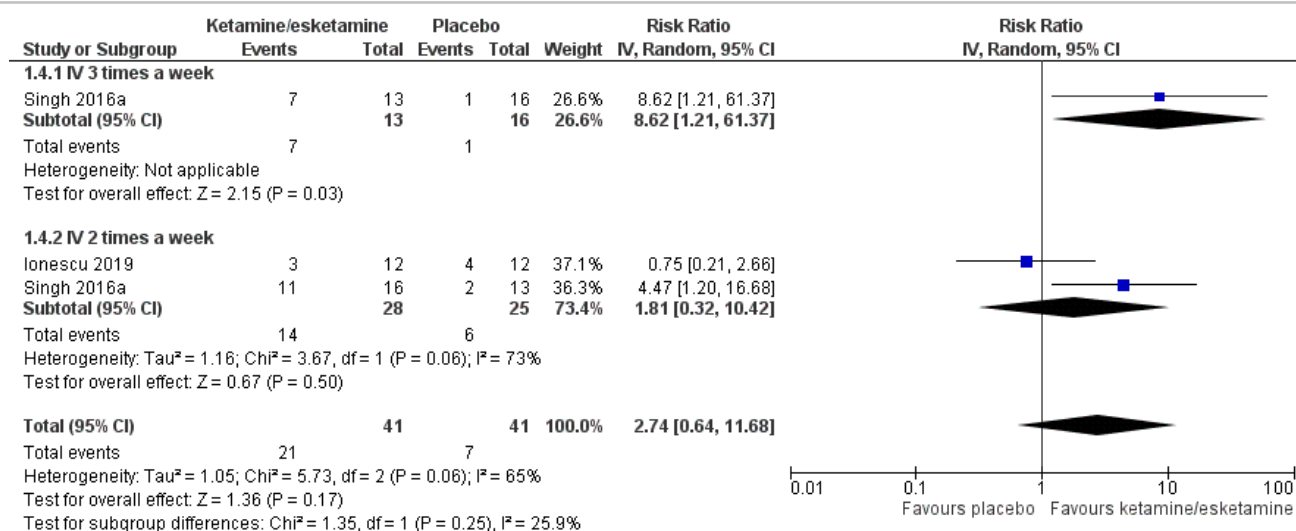

Forest plot of comparison: 13 IV Ketamin versus placebo, outcome: 13.4 Response, subacute phase.

Figure 5 (Analysis 1.5)

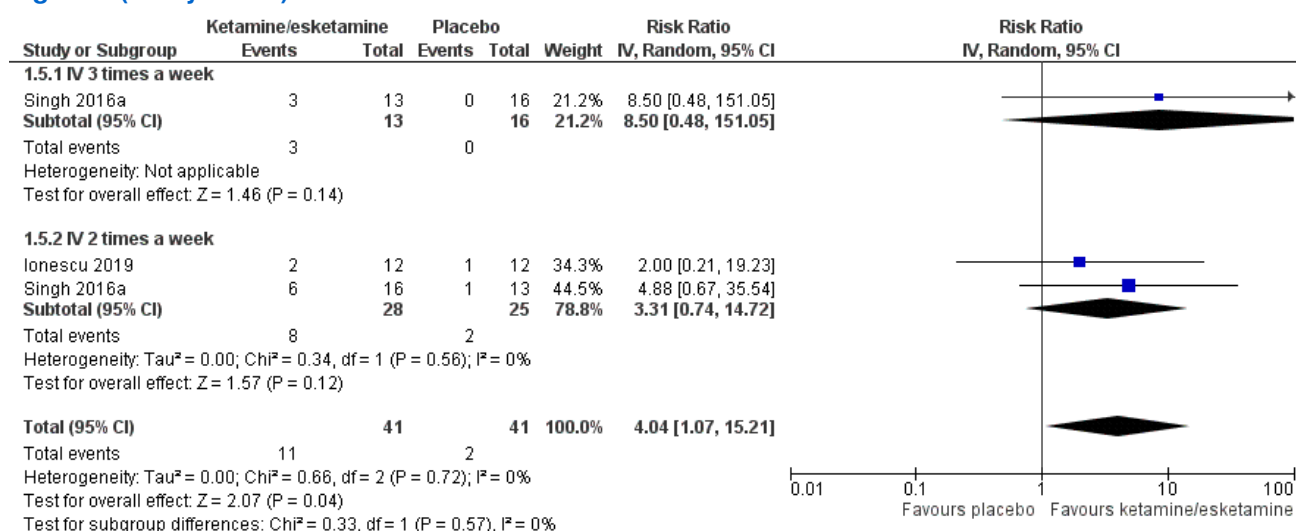

Forest plot of comparison: 13 IV Ketamin versus placebo, outcome: 13.5 Remission, subacute phase.

Figure 6 (Analysis 1.6)

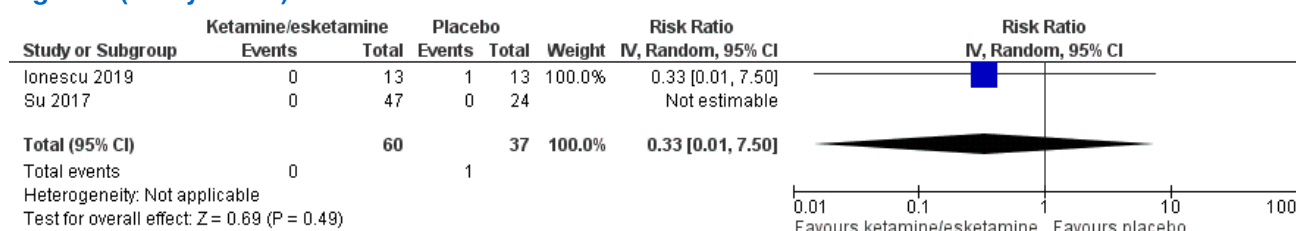

Forest plot of comparison: 13 IV Ketamin versus placebo, outcome: 13.6 Adverse events indlæggelse.

Figure 7 (Analysis 1.7)

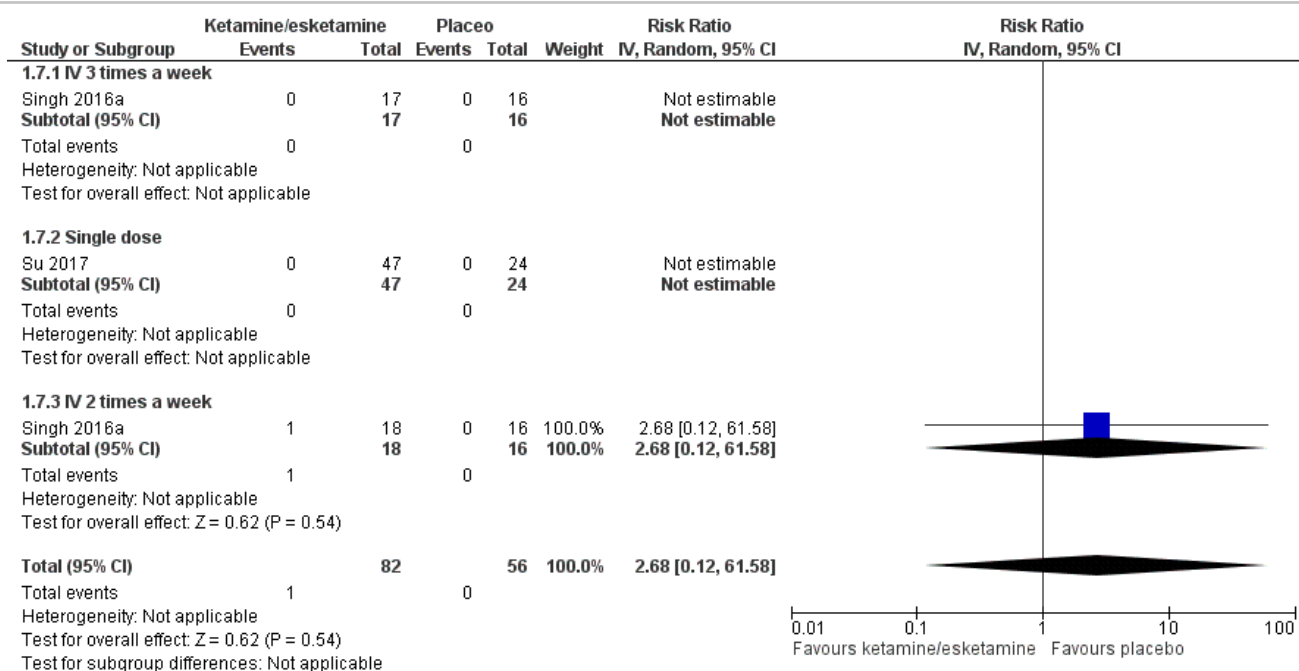

Forest plot of comparison: 13 IV Ketamin versus placebo, outcome: 13.7 Adverse event - selvmordsforsøg.

Figure 8 (Analysis 1.8)

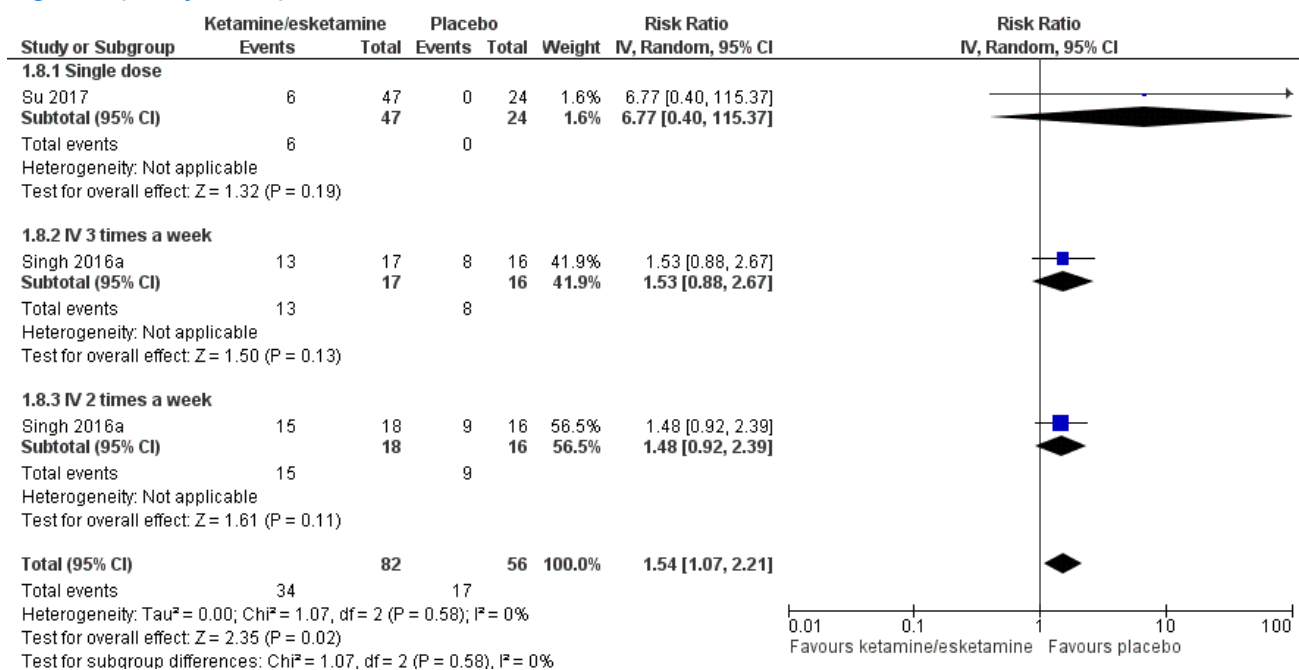

Forest plot of comparison: 13 IV Ketamin versus placebo, outcome: 13.8 Øvrige bivirkninger.

Figure 9 (Analysis 1.9)

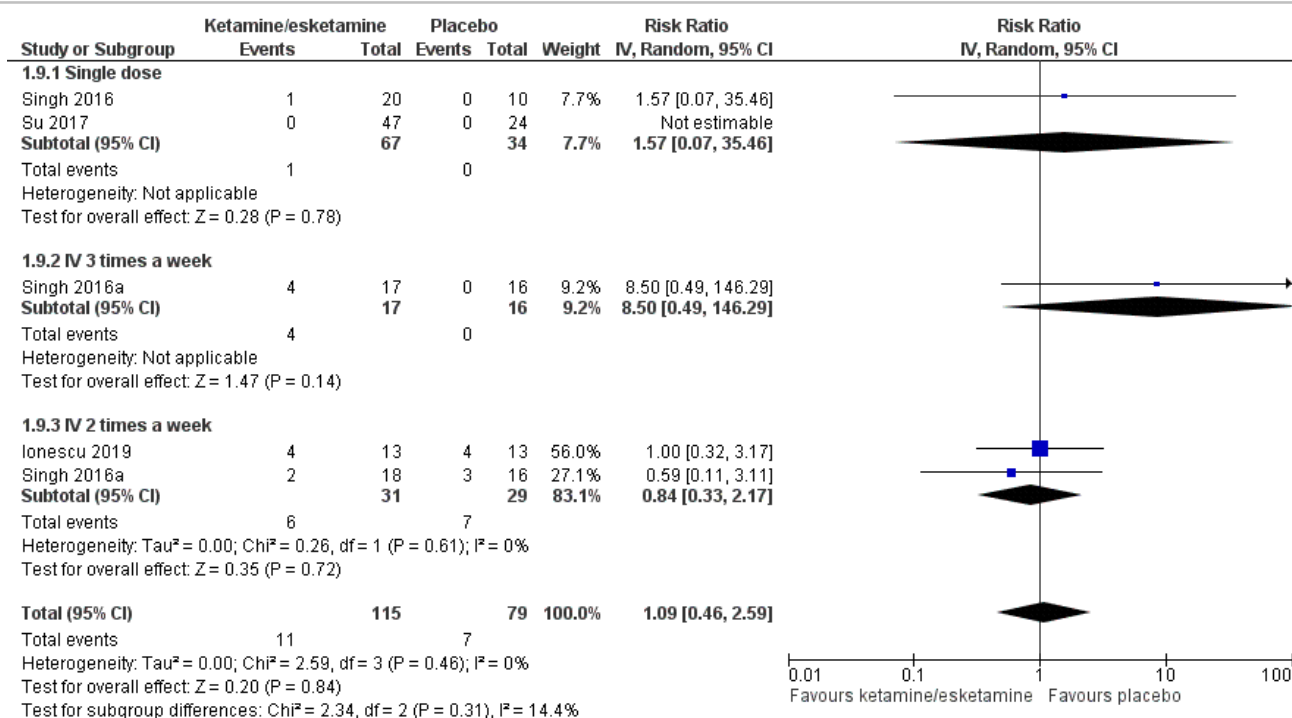

Forest plot of comparison: 13 IV Ketamin versus placebo, outcome: 13.9 Frafald.

## Sources of support

### Internal sources

- No sources of support provided

### External sources

- No sources of support provided

## Feedback

## Appendices
