# Supplementary material
Source: publisher figshare collection journal article supplement (https://tandf.figshare.com/articles/dataset/_/16529476)
Supplement: Supplementary file 4 [file 2]

# CBASP for Treatment resistant depression

## Review information

### Authors

[Empty name]<sup>1</sup>

<sup>1</sup>[Empty affiliation]

Citation example: [Empty name]. CBASP for Treatment resistant depression. Cochrane Database of Systematic Reviews [Year], Issue [Issue].

### Contact person

*[Empty name]*

### Dates

Assessed as Up-to-date:

Date of Search:

Next Stage Expected:

Protocol First Published: Not specified

Review First Published: Not specified

Last Citation Issue: Not specified

### What's new

| Date / Event | Description |
|--------------|-------------|
|--------------|-------------|

### History

| Date / Event | Description |
|--------------|-------------|
|--------------|-------------|

## Abstract

### Background

### Objectives

### Search methods

### Selection criteria

### Data collection and analysis

### Main results

## Authors' conclusions

## Plain language summary

**[Summary title]**

[Summary text]

## Background

Description of the condition

Description of the intervention

How the intervention might work

Why it is important to do this review

## Objectives

## Methods

Criteria for considering studies for this review

*Types of studies*

*Types of participants*

*Types of interventions*

*Types of outcome measures*

Primary outcomes

Secondary outcomes

Search methods for identification of studies

*Electronic searches*

***Searching other resources*****Data collection and analysis*****Selection of studies******Data extraction and management******Assessment of risk of bias in included studies******Measures of treatment effect******Unit of analysis issues******Dealing with missing data******Assessment of heterogeneity******Assessment of reporting biases******Data synthesis******Subgroup analysis and investigation of heterogeneity******Sensitivity analysis*****Results****Description of studies*****Results of the search******Included studies******Excluded studies***

**Risk of bias in included studies***Allocation (selection bias)**Blinding (performance bias and detection bias)**Incomplete outcome data (attrition bias)**Selective reporting (reporting bias)**Other potential sources of bias***Effects of interventions****Discussion****Summary of main results****Overall completeness and applicability of evidence****Quality of the evidence****Potential biases in the review process****Agreements and disagreements with other studies or reviews****Authors' conclusions****Implications for practice****Implications for research****Acknowledgements****Contributions of authors**

## Declarations of interest

## Differences between protocol and review

## Published notes

## Characteristics of studies

### Characteristics of included studies

#### Keller 2000

|                     |                                                                                                                                                                                                                                                                                                                                                                                                                                                                                                                                                                                                                                                                                                                                                                                                                                                                                                                                                                                                                                                                                                                                                                                                                                                                                                                                                                                                                                                                                                                                                                                                                                                                                                                                                                                                                                                                                                                                                                                                                                                                                                                                                                                                                                                                                                                                                                                                                                                                                                                                                                                                                                                                                                                                                                                                                                            |
|---------------------|--------------------------------------------------------------------------------------------------------------------------------------------------------------------------------------------------------------------------------------------------------------------------------------------------------------------------------------------------------------------------------------------------------------------------------------------------------------------------------------------------------------------------------------------------------------------------------------------------------------------------------------------------------------------------------------------------------------------------------------------------------------------------------------------------------------------------------------------------------------------------------------------------------------------------------------------------------------------------------------------------------------------------------------------------------------------------------------------------------------------------------------------------------------------------------------------------------------------------------------------------------------------------------------------------------------------------------------------------------------------------------------------------------------------------------------------------------------------------------------------------------------------------------------------------------------------------------------------------------------------------------------------------------------------------------------------------------------------------------------------------------------------------------------------------------------------------------------------------------------------------------------------------------------------------------------------------------------------------------------------------------------------------------------------------------------------------------------------------------------------------------------------------------------------------------------------------------------------------------------------------------------------------------------------------------------------------------------------------------------------------------------------------------------------------------------------------------------------------------------------------------------------------------------------------------------------------------------------------------------------------------------------------------------------------------------------------------------------------------------------------------------------------------------------------------------------------------------------|
| <b>Methods</b>      | <b>Study design:</b> Randomized controlled trial<br><b>Study grouping:</b> Parallel group                                                                                                                                                                                                                                                                                                                                                                                                                                                                                                                                                                                                                                                                                                                                                                                                                                                                                                                                                                                                                                                                                                                                                                                                                                                                                                                                                                                                                                                                                                                                                                                                                                                                                                                                                                                                                                                                                                                                                                                                                                                                                                                                                                                                                                                                                                                                                                                                                                                                                                                                                                                                                                                                                                                                                  |
| <b>Participants</b> | <p><b>Baseline Characteristics</b></p> <p>CBASP only (n=220)</p> <ul style="list-style-type: none"> <li>● Age: 43.2 (10.8)</li> <li>● Gender (female): 62.7%</li> </ul> <p>Med only (n=216)</p> <ul style="list-style-type: none"> <li>● Age: 42.2 (11.0)</li> <li>● Gender (female): 64.2%</li> </ul> <p>CBASP and Meds (n=226)</p> <ul style="list-style-type: none"> <li>● Age: 44.4 (10.3)</li> <li>● Gender (female): 69.2</li> </ul> <p>Overall</p> <ul style="list-style-type: none"> <li>● Age: 43 (10.7)</li> <li>● Gender (female): 65.3</li> </ul> <p><b>Included criteria:</b> Chronic major depressive disorder (at least two years' duration), a current major depressive disorder superimposed on a pre-existing dysthymic disorder, or a recurrent major depressive disorder with incomplete remission between episodes in a patient with a current major depressive disorder and a total duration of continuous illness of at least two years. To be eligible for the study, the patients had to be between the ages of 18 and 75 years and to have had a score of at least 20 on the 24-item Hamilton Rating Scale for Depression (HRSD) at screening and, after a two-week drug-free period, at baseline. Patients were required to discontinue taking monoamine oxidase inhibitors and fluoxetine at least four weeks before study entry, depot neuroleptic agents at least six months before entry, and other psychotropic medications at least two weeks before entry.</p> <p><b>Excluded criteria:</b> Patients were excluded from the study if they had any of the following: a history of seizures, abnormal findings on electroencephalography, severe head trauma, or stroke; evidence suggesting they were at high risk for suicide; a history of psychotic symptoms or schizophrenia; bipolar disorder, an eating disorder (if it had not been in remission for at least one year), obsessive-compulsive disorder, or dementia; antisocial, schizotypal, or severe borderline personality disorder; a principal diagnosis of panic, generalized anxiety, social phobia, or post-traumatic stress disorders or any substance-related abuse or dependence disorder (except those involving nicotine) within six months before the study began; absence of a response to a previous adequate trial of nefazodone or a cognitive behavioral analysis system of psychotherapy; absence of a response to three previous adequate trials of at least two different classes of antidepressants or electroconvulsive therapy or two previous adequate trials of empirical psychotherapy in the three years preceding the study; a serious, unstable medical condition; or a positive urine screen for drugs of abuse. Women of childbearing potential had to agree to use adequate contraception during the study.</p> |

|                      |                                                                                                                                                                                                                                                                                                                                                                                                                                                                                                                                                                                                                                                                                                                                                                                                                                                                                                                                                                                                                                                                                                                                                                                                                                                                                                                                                                                                                                                                                                                                                                                                                                                                                                                                                                                                                                                                                                                                                                                                                                                                                                                                                                                                                                                                                                                                                                                                                                                                                                                                                                                              |
|----------------------|----------------------------------------------------------------------------------------------------------------------------------------------------------------------------------------------------------------------------------------------------------------------------------------------------------------------------------------------------------------------------------------------------------------------------------------------------------------------------------------------------------------------------------------------------------------------------------------------------------------------------------------------------------------------------------------------------------------------------------------------------------------------------------------------------------------------------------------------------------------------------------------------------------------------------------------------------------------------------------------------------------------------------------------------------------------------------------------------------------------------------------------------------------------------------------------------------------------------------------------------------------------------------------------------------------------------------------------------------------------------------------------------------------------------------------------------------------------------------------------------------------------------------------------------------------------------------------------------------------------------------------------------------------------------------------------------------------------------------------------------------------------------------------------------------------------------------------------------------------------------------------------------------------------------------------------------------------------------------------------------------------------------------------------------------------------------------------------------------------------------------------------------------------------------------------------------------------------------------------------------------------------------------------------------------------------------------------------------------------------------------------------------------------------------------------------------------------------------------------------------------------------------------------------------------------------------------------------------|
|                      | <p><b>Pretreatment:</b> There were no significant differences among the groups with respect to base-line demographic and clinical characteristics (see Table 2)</p>                                                                                                                                                                                                                                                                                                                                                                                                                                                                                                                                                                                                                                                                                                                                                                                                                                                                                                                                                                                                                                                                                                                                                                                                                                                                                                                                                                                                                                                                                                                                                                                                                                                                                                                                                                                                                                                                                                                                                                                                                                                                                                                                                                                                                                                                                                                                                                                                                          |
| <b>Interventions</b> | <p><b>Intervention Characteristics</b></p> <p>CBASP only (n=220)</p> <ul style="list-style-type: none"> <li>● <i>Meds only (Nefazodone 12 weeks):</i></li> <li>● <i>CBASP (16-20 sessions 12 weeks):</i> The cognitive behavioral-analysis system of psychotherapy also followed a manual<sup>37</sup> specifying twice-weekly sessions during weeks 1 through 4 and weekly sessions during weeks 5 through 12. Twice-weekly sessions could be extended until week 8 if a patient was not adequately performing a learned social problem-solving procedure according to the criteria. Psychotherapists (persons who had at least two years' experience after earning an M.D. or Ph.D. or at least five years' experience after earning an M.S.W.) attended a two-day training workshop and met the criteria for mastery of treatment procedures involved in the cognitive behavioral-analysis system of psychotherapy, as assessed by evaluation of their performance during two videotaped pilot cases. All psychotherapy sessions conducted during the study were videotaped, and supervisors reviewed the videotapes weekly to assess the psychotherapists' adherence to the treatment procedures.</li> <li>● <i>Meds &amp; CBASP (12 weeks):</i></li> </ul> <p>Med only (n=216)</p> <ul style="list-style-type: none"> <li>● <i>Meds only (Nefazodone 12 weeks):</i> The initial dose was 200 mg per day (100 mg twice a day) and was increased to 300 mg per day during the second week. Thereafter, the dose was increased weekly in increments of 100 mg per day to a maximum of 600 mg per day, to maximize the efficacy of the drug without producing intolerable side effects. To remain in the study, patients had to be receiving a dose of at least 300 mg per day by week 3. Visits for medication were limited to 15 to 20 minutes. Psycho-pharmacologists followed a published manual<sup>36</sup> for clinical management (e.g., patients were questioned about the concomitant use of medications and symptoms, side effects, and illnesses they had had between visits). The psychopharmacologists were not allowed to make formal psychotherapeutic interventions (such as suggesting ways to cope with stressful life events).</li> <li>● <i>CBASP (16-20 sessions 12 weeks):</i></li> <li>● <i>Meds &amp; CBASP (12 weeks):</i></li> </ul> <p>CBASP and Meds (n=226)</p> <ul style="list-style-type: none"> <li>● <i>Meds only (Nefazodone 12 weeks):</i></li> <li>● <i>CBASP (16-20 sessions 12 weeks):</i></li> <li>● <i>Meds &amp; CBASP (12 weeks):</i></li> </ul> |
| <b>Outcomes</b>      | <p><i>Depressive symptoms HAM-D</i></p> <ul style="list-style-type: none"> <li>● <b>Outcome type:</b> Continuous Outcome</li> <li>● <b>Reporting:</b> Fully reported</li> <li>● <b>Scale:</b> HAM-D</li> <li>● <b>Direction:</b> Lower is better</li> <li>● <b>Data value:</b> Change from baseline</li> <li>● <b>Notes:</b> 24 item version of HAM-D. Numbers at completion are based on those that completed HAM-D at 12 weeks (Figure 1) but authors claim to have used ITT without clarifying how they did this.</li> </ul> <p><i>Adequate Response</i></p> <ul style="list-style-type: none"> <li>● <b>Outcome type:</b> Dichotomous Outcome</li> <li>● <b>Scale:</b> HAM-D</li> <li>● <b>Direction:</b> Higher is better</li> </ul> <p><i>Remission</i></p> <ul style="list-style-type: none"> <li>● <b>Outcome type:</b> Dichotomous Outcome</li> <li>● <b>Scale:</b> HAM-D</li> <li>● <b>Direction:</b> Higher is better</li> </ul>                                                                                                                                                                                                                                                                                                                                                                                                                                                                                                                                                                                                                                                                                                                                                                                                                                                                                                                                                                                                                                                                                                                                                                                                                                                                                                                                                                                                                                                                                                                                                                                                                                                  |

|                       |                                                                                                                                                                                                                                                                                                                                                                                                                                                                                                                                                                                                                                                                                                                                                                                                                                                                                                                  |
|-----------------------|------------------------------------------------------------------------------------------------------------------------------------------------------------------------------------------------------------------------------------------------------------------------------------------------------------------------------------------------------------------------------------------------------------------------------------------------------------------------------------------------------------------------------------------------------------------------------------------------------------------------------------------------------------------------------------------------------------------------------------------------------------------------------------------------------------------------------------------------------------------------------------------------------------------|
| <b>Identification</b> | <p><b>Sponsorship source:</b> all but 1 (B.A.) of the 12 principal authors have had financial associations with Bristol-Myers Squibb — which also sponsored the study — and, in most cases, with many other companies producing psychoactive pharmaceutical agents. The associations include consultancies, receipt of research grants and honorariums, and participation on advisory boards. Of the 17 other authors, 2 are employees of Bristol-Myers Squibb, 5 (L.M.K., G.K., I.M., R.M., D.V.) have no relevant additional financial ties, and the others have a variety of associations similar to those just mentioned.</p> <p><b>Country:</b> USA</p> <p><b>Setting:</b> Outpatient</p> <p><b>Comments:</b></p> <p><b>Authors name:</b> MARTIN B. KELLER</p> <p><b>Institution:</b> Department of Psychiatry, Brown University, Providence, R.I. (M.B.K.)</p> <p><b>Email:</b></p> <p><b>Address:</b></p> |
| <b>Notes</b>          | <p><i>Nicolai Ladegaard</i> on 13/10/2019 22:57</p> <p><b>Select</b></p> <p>study design: farma vs cbasp vs farma + cbasp</p> <p><i>Stephen Austin</i> on 25/10/2019 20:34</p> <p><b>Outcomes</b></p> <p>Adequate Response defined as reduction on HAM-D of at least 50% Remission score of 8 and under on HAM-D</p>                                                                                                                                                                                                                                                                                                                                                                                                                                                                                                                                                                                             |

## Risk of bias table

| Bias                                                      | Authors' judgement | Support for judgement                                                           |
|-----------------------------------------------------------|--------------------|---------------------------------------------------------------------------------|
| Random sequence generation (selection bias)               | Low risk           |                                                                                 |
| Allocation concealment (selection bias)                   | Low risk           | Judgement Comment: Randomized at central computerized schedule                  |
| Blinding of participants and personnel (performance bias) | High risk          |                                                                                 |
| Blinding of outcome assessment (detection bias)           | Low risk           |                                                                                 |
| Incomplete outcome data (attrition bias)                  | Low risk           | Quote: "The rates of discontinuation were similar in the three groups (P=0.46)" |
| Selective reporting (reporting bias)                      | Unclear risk       |                                                                                 |

## Kocsis 2009

|                     |                                                                                                                                                                                                                                                                                                                                                                              |
|---------------------|------------------------------------------------------------------------------------------------------------------------------------------------------------------------------------------------------------------------------------------------------------------------------------------------------------------------------------------------------------------------------|
| <b>Methods</b>      | <p><b>Study design:</b> Randomized controlled trial</p> <p><b>Study grouping:</b> Parallel group</p>                                                                                                                                                                                                                                                                         |
| <b>Participants</b> | <p><b>Baseline Characteristics</b></p> <p>CBASP</p> <ul style="list-style-type: none"> <li>● Age: 45.3 (11.9)</li> <li>● Gender (female): 56%</li> </ul> <p>MEDS</p> <ul style="list-style-type: none"> <li>● Age: 43.2 (13.4)</li> <li>● Gender (female): 47</li> </ul> <p>Overall</p> <ul style="list-style-type: none"> <li>● Age:</li> <li>● Gender (female):</li> </ul> |

|                       |                                                                                                                                                                                                                                                                                                                                                                                                                                                                                                                                                                                                                                                                                                                                                                                                                                                                                                                                                                                                                                                                                                                                                                                                    |
|-----------------------|----------------------------------------------------------------------------------------------------------------------------------------------------------------------------------------------------------------------------------------------------------------------------------------------------------------------------------------------------------------------------------------------------------------------------------------------------------------------------------------------------------------------------------------------------------------------------------------------------------------------------------------------------------------------------------------------------------------------------------------------------------------------------------------------------------------------------------------------------------------------------------------------------------------------------------------------------------------------------------------------------------------------------------------------------------------------------------------------------------------------------------------------------------------------------------------------------|
|                       | <p><b>Included criteria:</b> Major Depression Episode (MDE) without remission of depressive symptoms in 2 yrs</p> <p><b>Excluded criteria:</b> Psychosis, bipolar, personality disorder, PTSD, OCD, substance abuse disorder</p> <p><b>Pretreatment:</b></p>                                                                                                                                                                                                                                                                                                                                                                                                                                                                                                                                                                                                                                                                                                                                                                                                                                                                                                                                       |
| <b>Interventions</b>  | <p><b>Intervention Characteristics</b></p> <p>CBASP</p> <ul style="list-style-type: none"> <li>● MEDS ( 6 meetings over 12 weeks) :</li> <li>● CBASP (16 sessions over 12 weeks):</li> </ul> <p>MEDS</p> <ul style="list-style-type: none"> <li>● MEDS ( 6 meetings over 12 weeks) :</li> <li>● CBASP (16 sessions over 12 weeks):</li> </ul>                                                                                                                                                                                                                                                                                                                                                                                                                                                                                                                                                                                                                                                                                                                                                                                                                                                      |
| <b>Outcomes</b>       | <p><i>Depressive symptoms (HAM-D)</i></p> <ul style="list-style-type: none"> <li>● <b>Outcome type:</b> ContinuousOutcome</li> <li>● <b>Reporting:</b> Fully reported</li> <li>● <b>Scale:</b> HAM-D</li> <li>● <b>Direction:</b> Lower is better</li> <li>● <b>Data value:</b> Change from baseline</li> <li>● <b>Notes:</b> Missing data at follow-up (not ITT) at 12 weeks</li> </ul> <p><i>Functioning</i></p> <ul style="list-style-type: none"> <li>● <b>Outcome type:</b> ContinuousOutcome</li> <li>● <b>Reporting:</b> Fully reported</li> <li>● <b>Scale:</b> LIFE-RIFT Scale</li> <li>● <b>Direction:</b> Lower is better</li> <li>● <b>Data value:</b> Change from baseline</li> </ul> <p><i>Remission</i></p> <ul style="list-style-type: none"> <li>● <b>Outcome type:</b> DichotomousOutcome</li> <li>● <b>Notes:</b> Remission defined as score under 8 on HAM-D and at least a 50% decrease in symptoms from baseline</li> </ul> <p><i>Dropout</i></p> <ul style="list-style-type: none"> <li>● <b>Outcome type:</b> ContinuousOutcome</li> <li>● <b>Reporting:</b> Fully reported</li> <li>● <b>Direction:</b> Lower is better</li> <li>● <b>Data value:</b> Endpoint</li> </ul> |
| <b>Identification</b> | <p><b>Sponsorship source:</b> Kocsis</p> <p><b>Country:</b> USA</p> <p><b>Setting:</b> Outpatients</p> <p><b>Comments:</b> Randomized after non or partial response to medication</p> <p><b>Authors name:</b> Kocsis</p> <p><b>Institution:</b> Cornell Medical College New York</p> <p><b>Email:</b> jhk2002@med.cornell.edu</p> <p><b>Address:</b></p>                                                                                                                                                                                                                                                                                                                                                                                                                                                                                                                                                                                                                                                                                                                                                                                                                                           |
| <b>Notes</b>          | <p><i>Nicolai Ladegaard on 13/10/2019 23:39</i></p> <p><b>Select</b></p> <p>REVAMP hovedstudie</p>                                                                                                                                                                                                                                                                                                                                                                                                                                                                                                                                                                                                                                                                                                                                                                                                                                                                                                                                                                                                                                                                                                 |

## Risk of bias table



| Bias                                                      | Authors' judgement | Support for judgement                                                                                                                                                                               |
|-----------------------------------------------------------|--------------------|-----------------------------------------------------------------------------------------------------------------------------------------------------------------------------------------------------|
| Random sequence generation (selection bias)               | Low risk           | Quote: "Randomization was done centrally at the Pittsburgh data-coordinating center stratified by site,"                                                                                            |
| Allocation concealment (selection bias)                   | Low risk           | Judgement Comment: Randomized centrally and off-site                                                                                                                                                |
| Blinding of participants and personnel (performance bias) | High risk          | Judgement Comment: Participants and personel are aware if person receives CBASP or Meds only                                                                                                        |
| Blinding of outcome assessment (detection bias)           | Low risk           | Judgement Comment: To maintain unbiased estimates of treatment effects, the HAM-Dand LIFE-RIFT evaluations were performed by blinded raters.                                                        |
| Incomplete outcome data (attrition bias)                  | Low risk           | Judgement Comment: Missing data at baseline and follow-up reported. Analysis does not appear to compensate for missing data (imputations or LOCF). However, comparable drop-out rates for all arms. |
| Selective reporting (reporting bias)                      | Unclear risk       | Judgement Comment: Kan ikke finde forsk. protokol på clinicaltrials.gov                                                                                                                             |

**Michalak 2015**

|                      |                                                                                                                                                                                                                                                                                                                                                                                                                                                                                                                                                                                                                                                                                              |
|----------------------|----------------------------------------------------------------------------------------------------------------------------------------------------------------------------------------------------------------------------------------------------------------------------------------------------------------------------------------------------------------------------------------------------------------------------------------------------------------------------------------------------------------------------------------------------------------------------------------------------------------------------------------------------------------------------------------------|
| <b>Methods</b>       | <b>Study design:</b> Randomized controlled trial<br><b>Study grouping:</b> Parallel group                                                                                                                                                                                                                                                                                                                                                                                                                                                                                                                                                                                                    |
| <b>Participants</b>  | <b>Baseline Characteristics</b><br>CBASP <ul style="list-style-type: none"> <li>● Age: 50.2 years (10.5)</li> <li>● Gender (female): 62.9% (22)</li> </ul> TAU <ul style="list-style-type: none"> <li>● Age: 54.0 years (13.24)</li> <li>● Gender (female): 65.7% (23)</li> </ul> Overall <ul style="list-style-type: none"> <li>● Age:</li> <li>● Gender (female):</li> </ul> <b>Included criteria:</b> Major depressive episode (MDE) and depressive symptoms 2+ years without remission<br><b>Excluded criteria:</b> Schizophrenia, substance abuse, eating disorder, organic mental disorder, borderline personality disorder , inability to engage in treatment<br><b>Pretreatment:</b> |
| <b>Interventions</b> | <b>Intervention Characteristics</b><br>CBASP <ul style="list-style-type: none"> <li>● CBASP (2 individual, 8 group sessions -8 weeks):</li> <li>● TAU (weekly meeting with psychiatrist -8 weeks):</li> </ul> TAU <ul style="list-style-type: none"> <li>● CBASP (2 individual, 8 group sessions -8 weeks):</li> <li>● TAU (weekly meeting with psychiatrist -8 weeks):</li> </ul>                                                                                                                                                                                                                                                                                                           |
| <b>Outcomes</b>      | Depressive symptoms Ham-D (interviewer rated) <ul style="list-style-type: none"> <li>● <b>Outcome type:</b> ContinuousOutcome</li> <li>● <b>Reporting:</b> Fully reported</li> <li>● <b>Scale:</b> Ham-D</li> <li>● <b>Direction:</b> Lower is better</li> <li>● <b>Data value:</b> Change from baseline</li> </ul> Depressive symptoms BDI (self reported) <ul style="list-style-type: none"> <li>● <b>Outcome type:</b> ContinuousOutcome</li> <li>● <b>Reporting:</b> Fully reported</li> </ul>                                                                                                                                                                                           |

|                       |                                                                                                                                                                                                                                                                                                                                                                                                                                                                                                                                                                                                                                                                                                                                                                                                                                                                                                                                                                                                                                                                                                                                                                                                                                                                                                                                                          |
|-----------------------|----------------------------------------------------------------------------------------------------------------------------------------------------------------------------------------------------------------------------------------------------------------------------------------------------------------------------------------------------------------------------------------------------------------------------------------------------------------------------------------------------------------------------------------------------------------------------------------------------------------------------------------------------------------------------------------------------------------------------------------------------------------------------------------------------------------------------------------------------------------------------------------------------------------------------------------------------------------------------------------------------------------------------------------------------------------------------------------------------------------------------------------------------------------------------------------------------------------------------------------------------------------------------------------------------------------------------------------------------------|
|                       | <ul style="list-style-type: none"> <li>● <b>Scale:</b> Beck Depression Inventory BDI</li> <li>● <b>Range:</b> 0-63</li> <li>● <b>Direction:</b> Lower is better</li> <li>● <b>Data value:</b> Change from baseline</li> </ul> <p><i>Remission</i></p> <ul style="list-style-type: none"> <li>● <b>Outcome type:</b> DichotomousOutcome</li> <li>● <b>Reporting:</b> Fully reported</li> <li>● <b>Scale:</b> Definition of remission?</li> <li>● <b>Range:</b> 0-100</li> <li>● <b>Direction:</b> Higher is better</li> <li>● <b>Data value:</b> Endpoint</li> </ul> <p><i>Social functioning</i></p> <ul style="list-style-type: none"> <li>● <b>Outcome type:</b> ContinuousOutcome</li> <li>● <b>Scale:</b> Short Form Health Survey (social functioning domain)</li> <li>● <b>Direction:</b> Higher is better</li> <li>● <b>Data value:</b> Change from baseline</li> <li>● <b>Notes:</b> Table 5 Fixed Effects of the Multilevel Analyses Investigating the Four Mental Health Subscales of the Short Form Health Survey and the SASS. Effect size is calculated against TAU</li> </ul> <p><i>Dropout</i></p> <ul style="list-style-type: none"> <li>● <b>Outcome type:</b> ContinuousOutcome</li> <li>● <b>Reporting:</b> Fully reported</li> <li>● <b>Direction:</b> Lower is better</li> <li>● <b>Data value:</b> Change from baseline</li> </ul> |
| <b>Identification</b> | <p><b>Sponsorship source:</b> Michalak</p> <p><b>Country:</b> Germany</p> <p><b>Setting:</b> Outpatient</p> <p><b>Comments:</b></p> <p><b>Authors name:</b> Michalak</p> <p><b>Institution:</b> Witten/Herdecke University</p> <p><b>Email:</b> johannes-michalak@uni-wh.de</p> <p><b>Address:</b></p>                                                                                                                                                                                                                                                                                                                                                                                                                                                                                                                                                                                                                                                                                                                                                                                                                                                                                                                                                                                                                                                   |
| <b>Notes</b>          | <p><i>Nicolai Ladegaard on 14/10/2019 21:57</i></p> <p><b>Select</b></p> <p>Patients were randomly assigned to either TAU alone or—in addition to TAU— either MBCT or CBASP. TAU: All patients were instructed that they should be in individual treatment by either a psychiatrist or a licensed psychotherapist (not a member of the study team) during the study period. If patients were already in psychiatric or psychotherapeutic individual treatment at study intake, they continued their treatment with this psychiatrist or psychotherapist. Patients were encouraged to continue any current medication and to attend appointments with their psychiatrist or psychotherapist</p>                                                                                                                                                                                                                                                                                                                                                                                                                                                                                                                                                                                                                                                           |

## Risk of bias table

| Bias                                        | Authors' judgement | Support for judgement                                                                                                                                                                                         |
|---------------------------------------------|--------------------|---------------------------------------------------------------------------------------------------------------------------------------------------------------------------------------------------------------|
| Random sequence generation (selection bias) | Low risk           | Judgement Comment: Randomization was performed by the independent allocator using a computer-generated list of random numbers. The central allocator then mailed the allocations back to the treatment sites. |
| Allocation concealment (selection bias)     | Low risk           | Judgement Comment: Randomly assigned by independent allocator using computer generated list of random numbers (off site)                                                                                      |

|                                                           |           |                                                                                                                                                                                |
|-----------------------------------------------------------|-----------|--------------------------------------------------------------------------------------------------------------------------------------------------------------------------------|
| Blinding of participants and personnel (performance bias) | High risk | Judgement Comment: Ikke mulig at blinde deltagere ifht MED eller psykoterapi                                                                                                   |
| Blinding of outcome assessment (detection bias)           | Low risk  | Judgement Comment: To maintain rater blindness, patients were instructed at the beginning of each interview not to mention their treatment condition or their psychotherapist. |
| Incomplete outcome data (attrition bias)                  | Low risk  | Judgement Comment: Dropout rates provided and stated that used ITT analysis at post assessment                                                                                 |
| Selective reporting (reporting bias)                      | Low risk  | Judgement Comment: <a href="https://clinicaltrials.gov/ct2/show/NCT01065311">https://clinicaltrials.gov/ct2/show/NCT01065311</a>                                               |

**Wiersma 2014**

|                      |                                                                                                                                                                                                                                                                                                                                                                                                                                                                                                                                                                                                                                                                                                                                                                                                                                                                                                                                             |
|----------------------|---------------------------------------------------------------------------------------------------------------------------------------------------------------------------------------------------------------------------------------------------------------------------------------------------------------------------------------------------------------------------------------------------------------------------------------------------------------------------------------------------------------------------------------------------------------------------------------------------------------------------------------------------------------------------------------------------------------------------------------------------------------------------------------------------------------------------------------------------------------------------------------------------------------------------------------------|
| <b>Methods</b>       | <b>Study design:</b> Randomized controlled trial<br><b>Study grouping:</b>                                                                                                                                                                                                                                                                                                                                                                                                                                                                                                                                                                                                                                                                                                                                                                                                                                                                  |
| <b>Participants</b>  | <b>Baseline Characteristics</b><br>CBASP <ul style="list-style-type: none"> <li>● Age: 40.1 years (10.8)</li> <li>● Gender (female): 68.7%</li> </ul> CAU <ul style="list-style-type: none"> <li>● Age: 43.0 years (10.1)</li> <li>● Gender (female): 51.4%</li> </ul> Overall <ul style="list-style-type: none"> <li>● Age:</li> <li>● Gender (female):</li> </ul> <b>Included criteria:</b> 18-65 YEARS Chronic form of MDD (2+ yrs) Moderate depression (22+ IDS)<br><b>Excluded criteria:</b> Psychotic disorder Bipolar disorder Organic brain disorder Substance Abuse<br><b>Pretreatment:</b>                                                                                                                                                                                                                                                                                                                                        |
| <b>Interventions</b> | <b>Intervention Characteristics</b><br>CBASP <ul style="list-style-type: none"> <li>● CAU Care as usual (23 sessions over a year):</li> <li>● CBASP 24 sessions over a year (52 weeks):</li> </ul> CAU <ul style="list-style-type: none"> <li>● CAU Care as usual (23 sessions over a year):</li> <li>● CBASP 24 sessions over a year (52 weeks):</li> </ul>                                                                                                                                                                                                                                                                                                                                                                                                                                                                                                                                                                                |
| <b>Outcomes</b>      | <b>Depressive symptoms (self-report)</b> <ul style="list-style-type: none"> <li>● <b>Outcome type:</b> Continuous Outcome</li> <li>● <b>Reporting:</b> Fully reported</li> <li>● <b>Scale:</b> Inventory for Depressive symptoms (28 items)</li> <li>● <b>Direction:</b> Lower is better</li> <li>● <b>Data value:</b> Change from baseline</li> </ul> <b>Response</b> <ul style="list-style-type: none"> <li>● <b>Outcome type:</b> Dichotomous Outcome</li> <li>● <b>Reporting:</b> Partially reported</li> <li>● <b>Scale:</b> IDS</li> <li>● <b>Range:</b> 0-100%</li> <li>● <b>Direction:</b> Higher is better</li> <li>● <b>Data value:</b> Endpoint</li> <li>● <b>Notes:</b> Remission defined as 13 or less on IDS (ITT analysis)</li> </ul> <b>Remission</b> <ul style="list-style-type: none"> <li>● <b>Outcome type:</b> Dichotomous Outcome</li> <li>● <b>Reporting:</b> Fully reported</li> <li>● <b>Scale:</b> IDS</li> </ul> |

|                       |                                                                                                                                                                                                                                                                                                                                                                                                                                                              |
|-----------------------|--------------------------------------------------------------------------------------------------------------------------------------------------------------------------------------------------------------------------------------------------------------------------------------------------------------------------------------------------------------------------------------------------------------------------------------------------------------|
|                       | <ul style="list-style-type: none"> <li>● <b>Direction:</b> Higher is better</li> <li>● <b>Data value:</b> Endpoint</li> <li>● <b>Notes:</b> Response defined as 50% reduction on IDS</li> </ul> <p><i>dropout</i></p> <ul style="list-style-type: none"> <li>● <b>Outcome type:</b> ContinuousOutcome</li> <li>● <b>Reporting:</b> Fully reported</li> <li>● <b>Direction:</b> Lower is better</li> <li>● <b>Data value:</b> Change from baseline</li> </ul> |
| <b>Identification</b> | <p><b>Sponsorship source:</b> Wiersma</p> <p><b>Country:</b> Netherlands</p> <p><b>Setting:</b> Outpatient</p> <p><b>Comments:</b></p> <p><b>Authors name:</b> Wiersma</p> <p><b>Institution:</b> Department of Psychiatry, VU Medical Centre, Amsterdam</p> <p><b>Email:</b> j.wiersma@ggzingest.nl</p> <p><b>Address:</b></p>                                                                                                                              |
| <b>Notes</b>          | <p><i>Nicolai Ladegaard</i> on 15/10/2019 00:09</p> <p><b>Select</b></p> <p>CBASP + TAU vs. TAU. In both arms algorithm-based pharmacotherapy was provided.</p>                                                                                                                                                                                                                                                                                              |

### Risk of bias table

| Bias                                                      | Authors' judgement | Support for judgement                                                                                                                    |
|-----------------------------------------------------------|--------------------|------------------------------------------------------------------------------------------------------------------------------------------|
| Random sequence generation (selection bias)               | Low risk           | Judgement Comment: Randomization was performed by an external researcher using a computerized random number generator                    |
| Allocation concealment (selection bias)                   | Low risk           | Judgement Comment: Allocation made offsite                                                                                               |
| Blinding of participants and personnel (performance bias) | High risk          | Judgement Comment: Not able to blind therapists of treatment condition                                                                   |
| Blinding of outcome assessment (detection bias)           | High risk          | Judgement Comment: Given the nature of this study, it was not possible to keep them 100% guaranteed blind for treatment allocation       |
| Incomplete outcome data (attrition bias)                  | Low risk           | Judgement Comment: Comparable drop-out rates in both arms. ITT analysis Imputation                                                       |
| Selective reporting (reporting bias)                      | Low risk           | Judgement Comment: Netherlands Trail Reg.: <a href="https://www.trialregister.nl/trial/1057">https://www.trialregister.nl/trial/1057</a> |
| Other bias                                                | Unclear risk       |                                                                                                                                          |

### Footnotes

## Characteristics of excluded studies

### Brakemeier 2011

|                             |          |
|-----------------------------|----------|
| <b>Reason for exclusion</b> | Protocol |
|-----------------------------|----------|

### Brakemeier 2011a

|                             |                    |
|-----------------------------|--------------------|
| <b>Reason for exclusion</b> | Wrong study design |
|-----------------------------|--------------------|

**Brakemeier 2015**

|                      |                    |
|----------------------|--------------------|
| Reason for exclusion | Wrong study design |
|----------------------|--------------------|

**Forkmann 2016**

|                      |                |
|----------------------|----------------|
| Reason for exclusion | Wrong outcomes |
|----------------------|----------------|

**Guhn 2019**

|                      |                    |
|----------------------|--------------------|
| Reason for exclusion | Wrong study design |
|----------------------|--------------------|

**Klein 2011**

|                      |                |
|----------------------|----------------|
| Reason for exclusion | Wrong outcomes |
|----------------------|----------------|

**NCT02149381 2014**

|                      |          |
|----------------------|----------|
| Reason for exclusion | Protocol |
|----------------------|----------|

**Sabas 2018**

|                      |                    |
|----------------------|--------------------|
| Reason for exclusion | Wrong study design |
|----------------------|--------------------|

**Sayegh 2012**

|                      |                    |
|----------------------|--------------------|
| Reason for exclusion | Wrong study design |
|----------------------|--------------------|

**Schramm 2011**

|                      |                  |
|----------------------|------------------|
| Reason for exclusion | Wrong comparator |
|----------------------|------------------|

**Schramm 2015**

|                      |                    |
|----------------------|--------------------|
| Reason for exclusion | Wrong study design |
|----------------------|--------------------|

**Schramm 2017**

|                      |                  |
|----------------------|------------------|
| Reason for exclusion | Wrong comparator |
|----------------------|------------------|

**Schramm 2019**

|                      |                  |
|----------------------|------------------|
| Reason for exclusion | Wrong comparator |
|----------------------|------------------|

**Swan 2014**

|                      |                    |
|----------------------|--------------------|
| Reason for exclusion | Wrong study design |
|----------------------|--------------------|

**Truax 2005**

|                      |            |
|----------------------|------------|
| Reason for exclusion | Commentary |
|----------------------|------------|

**Wiersma 2009**

|                      |          |
|----------------------|----------|
| Reason for exclusion | Protocol |
|----------------------|----------|

*Footnotes*

## Characteristics of studies awaiting classification

Footnotes

## Characteristics of ongoing studies

Footnotes

## Summary of findings tables

## Additional tables

## References to studies

### Included studies

#### ***Keller 2000***

Keller M.B.; McCullough J.P.; Klein D.N.; Arnow B.; Dunner D.L.; Gelenberg A.J.; Markowitz J.C.; Nemeroff C.B.; Russell J.M.; Thase M.E.; Trivedi M.H.; Zajecka J.; Blalock J.A.; Borian F.E.; Jody D.N.; DeBattista C.; Koran L.M.; Schatzberg A.F.; Fawcett J.; Hirschfeld R.M.A.; Keitner G.; Miller I.; Kocsis J.H.; Kornstein S.G.; Manber R.; Ninan P.T.; Rothbaum B.; Rush A.J.; Vivian, D.. A comparison of nefazodone, the cognitive behavioral-analysis system of psychotherapy, and their combination for the treatment of chronic depression.. *New England Journal of Medicine* 2000;342(20):1462-1470. [DOI: ]

#### ***Kocsis 2009***

Kocsis J.H.; Gelenberg A.J.; Rothbaum B.O.; Klein D.N.; Trivedi M.H.; Manber R.; Keller M.B.; Leon A.C.; Wisniewski S.R.; Arnow B.A.; Markowitz J.C.; Thase M.E.; Friedman R.A.; Friedman E.S.; Howland R.H.; Barkin J.; Vivian D.; Dowling F.; D'Zurilla T.; Sunderajan P.; Morris D.; Kleiber B.; Dunlop B.; Ninan P.T.; Garlow S.J.; Misiaszek J.; Miller I.; Keitner G.; Raffa S.; Schatzberg A.F.; Brent Solvason H.; McCullough, J.. Cognitive behavioral analysis system of psychotherapy and brief supportive psychotherapy for augmentation of antidepressant nonresponse in chronic depression: The REVAMP trial.. *Archives of General Psychiatry* 2009;66(11):1178-1188. [DOI: ]

#### ***Michalak 2015***

Michalak J.; Schultze M.; Heidenreich T.; Schramm, E.. A randomized controlled trial on the efficacy of mindfulness-based cognitive therapy and a group version of cognitive behavioral analysis system of psychotherapy for chronically depressed patients.. *Journal of consulting and clinical psychology* 2015;83(5):951-963. [DOI: ]

#### ***Wiersma 2014***

Wiersma J.E.; Van Schaik D.J.; Hoogendorn A.W.; Dekker J.J.; Van H.L.; Schoevers R.A.; Blom M.B.; Maas K.; Smit J.H.; McCullough J.P.; Beekman A.T.; Van Oppen, P.. The effectiveness of the cognitive behavioral analysis system of psychotherapy for chronic depression: a randomized controlled trial.. *Psychotherapy and psychosomatics* 2014;83(5):263-269. [DOI: ]

### Excluded studies

#### ***Brakemeier 2011***

Brakemeier, E-L. Feasibility and effectiveness of cognitive behavioral analysis system of psychotherapy for chronically depressed inpatients: a pilot study. 2011;26(Journal Article). [DOI: 10.1016/S0924-9338(11)73868-8]

#### ***Brakemeier 2011a***

Brakemeier E.L.; Engel V.; Schramm E.; Zobel I.; Schmidt T.; Hautzinger M.; Berger M.; Normann, C.. Feasibility and outcome of cognitive behavioral analysis system of psychotherapy (CBASP) for chronically depressed inpatients: A pilot study.. *Psychotherapy and psychosomatics* 2011;80(3):191-194. [DOI: ]

#### ***Brakemeier 2015***

Brakemeier E.L.; Radtke M.; Engel V.; Zimmermann J.; TuschenCaffier B.; Hautzinger M.; Schramm E.; Berger M.; Normann, C.. Overcoming treatment resistance in chronic depression: A pilot study on outcome and feasibility of the cognitive behavioral

analysis system of psychotherapy as an inpatient treatment program.. *Psychotherapy and psychosomatics* 2015;84(1):51-56. [DOI: ]

### **Forkmann 2016**

Forkmann T.; Brakemeier E.L.; Teismann T.; Schramm E.; Michalak, J.. The Effects of Mindfulness-Based Cognitive Therapy and Cognitive Behavioral Analysis System of Psychotherapy added to Treatment as Usual on suicidal ideation in chronic depression: Results of a randomized-clinical trial.. *Journal of affective disorders* 2016;200(Journal Article):51-57. [DOI: ]

### **Guhn 2019**

Guhn A.; Kohler S.; Brakemeier E.L.; Sterzer, P.. Cognitive Behavioral Analysis System of Psychotherapy for inpatients with persistent depressive disorder: a naturalistic trial on a general acute psychiatric unit.. *European archives of psychiatry and clinical neuroscience* 2019;(pagination):ate of Pubaton: 2019. [DOI: ]

### **Klein 2011**

Klein, Daniel N.; Leon, Andrew C.; Li, Chunshan; D'Zurilla, Thomas J.; Black, Sarah R.; Vivian, Dina; Dowling, Frank; Arnow, Bruce A.; Manber, Rachel; Markowitz, John C.; Kocsis, James H.. Social problem solving and depressive symptoms over time: A randomized clinical trial of cognitive-behavioral analysis system of psychotherapy, brief supportive psychotherapy, and pharmacotherapy.. *Journal of consulting and clinical psychology* 2011;79(3):342-352. [DOI: ]

### **NCT02149381 2014**

NCT02149381,. *Psychosocial Group Interventions for Depression*. 2014;(Journal Article). [DOI: ]

### **Sabas 2018**

Sabas, Lena; Padberg, Frank; Normann, Claus; Engel, Vera; Konrad, Carsten; Helmle, Kristina; Jobst, Andrea; Worlitz, Andrew; Brakemeier, EvaLotta. Cognitive Behavioral Analysis System of Psychotherapy as group psychotherapy for chronically depressed inpatients: A naturalistic multicenter feasibility trial.. *European archives of psychiatry and clinical neuroscience* 2018;268(8):783-796. [DOI: ]

### **Sayegh 2012**

Sayegh L.; Locke K.D.; Pistilli D.; Penberthy J.K.; Chachamovich E.; McCullough J.P.; Turecki, G.. Cognitive behavioural analysis system of psychotherapy for treatment-resistant depression: Adaptation to a group modality.. *Behaviour Change* 2012;29(2):97-108. [DOI: ]

### **Schramm 2011**

Schramm E.; Zobel I.; Dykieriek P.; Kech S.; Brakemeier E.L.; Kulz A.; Berger, M.. Cognitive behavioral analysis system of psychotherapy versus interpersonal psychotherapy for early-onset chronic depression: A randomized pilot study.. *Journal of affective disorders* 2011;129(1-3):109-116. [DOI: ]

### **Schramm 2015**

Schramm E.; Zobel I.; Schoepf D.; Fangmeier T.; Schnell K.; Walter H.; Drost S.; Schmidt P.; Brakemeier E.L.; Berger M.; Normann, C.. Cognitive behavioral analysis system of psychotherapy versus escitalopram in chronic major depression.. *Psychotherapy and psychosomatics* 2015;84(4):227-240. [DOI: ]

### **Schramm 2017**

Schramm E.; Kriston L.; Zobel I.; Bailer J.; Wambach K.; Backenstrass M.; Klein J.P.; Schoepf D.; Schnell K.; Gumz A.; Bausch P.; Fangmeier T.; Meister R.; Berger M.; Hautzinger M.; Harter, M.. Effect of disorder-specific vs nonspecific psychotherapy for chronic depression: A randomized clinical trial.. *JAMA Psychiatry* 2017;74(3):233-242. [DOI: ]

### **Schramm 2019**

Schramm E.; Kriston L.; Elsaesser M.; Fangmeier T.; Meister R.; Bausch P.; Zobel I.; Bailer J.; Wambach K.; Backenstrass M.; Klein J.P.; Schoepf D.; Schnell K.; Gumz A.; Lowe B.; Walter H.; Wolf M.; Domschke K.; Berger M.; Hautzinger M.; Harter, M.. Two-year follow-up after treatment with the cognitive behavioral analysis system of psychotherapy versus supportive psychotherapy for early-onset chronic depression.. *Psychotherapy and psychosomatics* 2019;88(3):154-164. [DOI: ]

### **Swan 2014**

Swan, John S.; MacVicar, Robert; Christmas, David; Durham, Rob; Rauchhaus, Petra; McCullough, James P. Jr; Matthews, Keith. Cognitive Behavioural Analysis System of Psychotherapy (CBASP) for chronic depression: Clinical characteristics and six

month clinical outcomes in an open case series.. *Journal of affective disorders* 2014;152-154(Journal Article):268-276. [DOI: ]

### Truax 2005

Truax, P.. The cognitive behavioural analysis system of psychotherapy prevented recurrence in chronic major depression.. *Evidence-Based Medicine* 2005;10(3):85. [DOI: ]

### Wiersma 2009

Wiersma, J. E.; van Schaik, DJF; Blom, MJB; Bakker, L.; van Oppen, P.; Beekman, ATF. Treatment for chronic depression: cognitive behavioral analysis system of psychotherapy (CBASP). 2009;51(10):727-736. [DOI: ]

## Studies awaiting classification

### Ongoing studies

## Other references

### Additional references

### Other published versions of this review

## Data and analyses

### 1 CBASP vs control

| Outcome or Subgroup                     | Studies | Participants | Statistical Method                        | Effect Estimate      |
|-----------------------------------------|---------|--------------|-------------------------------------------|----------------------|
| 1.1 Depressive symptoms                 | 4       | 750          | Std. Mean Difference (IV, Random, 95% CI) | -0.53 [-0.86, -0.19] |
| 1.2 Response                            | 2       | 134          | Risk Ratio (IV, Random, 95% CI)           | 1.48 [0.75, 2.92]    |
| 1.3 Remission                           | 4       | 302          | Risk Ratio (IV, Random, 95% CI)           | 1.42 [1.01, 1.99]    |
| 1.4 Functioning                         | 2       |              | Std. Mean Difference (IV, Random, 95% CI) | 0.16 [-0.20, 0.52]   |
| 1.5 Frafald (All-cause discontinuation) | 4       | 944          | Risk Ratio (IV, Random, 95% CI)           | 0.80 [0.57, 1.11]    |

## Figures

Figure 1 (Analysis 1.1)

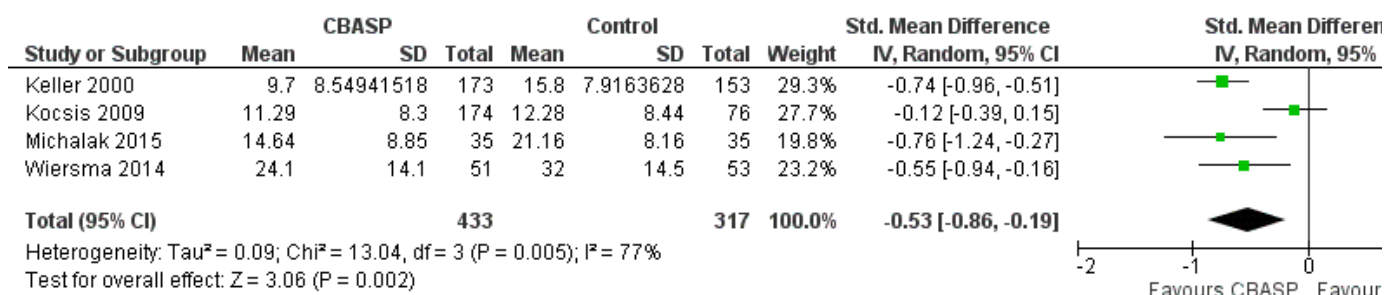

Forest plot of comparison: 1 CBASP vs control, outcome: 1.1 Depressive symptoms.



Figure 2 (Analysis 1.2)

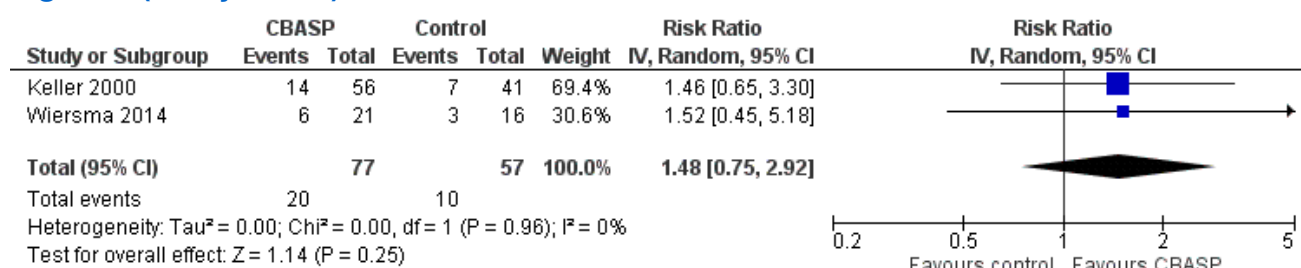

Forest plot of comparison: 1 CBASP vs control, outcome: 1.2 Response.

Figure 3 (Analysis 1.3)

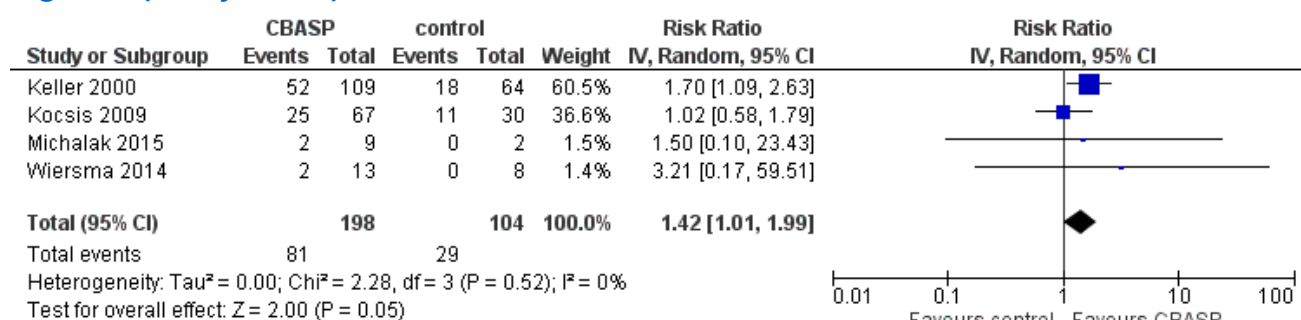

Forest plot of comparison: 1 CBASP vs control, outcome: 1.3 Remission.

Figure 4 (Analysis 1.4)

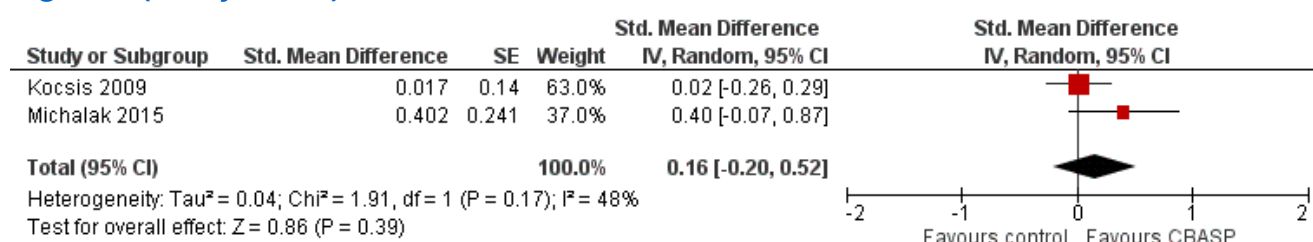

Forest plot of comparison: 1 CBASP vs control, outcome: 1.4 Functioning.

Figure 5 (Analysis 1.5)

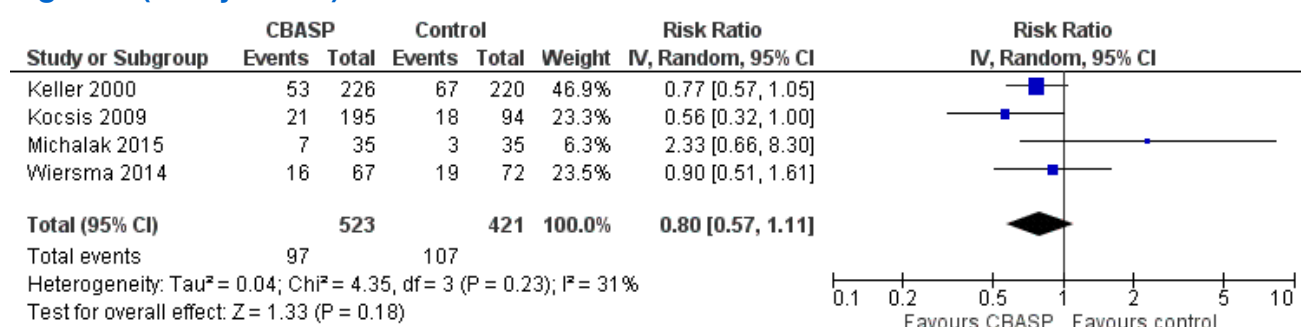

Forest plot of comparison: 1 CBASP vs control, outcome: 1.5 Frafald (All-cause discontinuation).

## Sources of support

### Internal sources

- No sources of support provided

## External sources

- No sources of support provided

## Feedback

## Appendices
