# Supplementary material
Source: publisher figshare collection journal article supplement (https://tandf.figshare.com/articles/dataset/_/16529476)
Supplement: Supplementary file 5 [file 2]

# Light therapy for Treatment resistant depression

## Review information

### Authors

[Empty name]<sup>1</sup>

<sup>1</sup>[Empty affiliation]

Citation example: [Empty name]. Light therapy for Treatment resistant depression. Cochrane Database of Systematic Reviews [Year], Issue [Issue].

### Contact person

*[Empty name]*

### Dates

|                           |               |
|---------------------------|---------------|
| Assessed as Up-to-date:   |               |
| Date of Search:           |               |
| Next Stage Expected:      |               |
| Protocol First Published: | Not specified |
| Review First Published:   | Not specified |
| Last Citation Issue:      | Not specified |

### What's new

| Date / Event | Description |
|--------------|-------------|
|--------------|-------------|

### History

| Date / Event | Description |
|--------------|-------------|
|--------------|-------------|

## Abstract

### Background

### Objectives

### Search methods

### Selection criteria

### Data collection and analysis

### Main results

## **Authors' conclusions**

## **Plain language summary**

**[Summary title]**

[Summary text]

## **Background**

**Description of the condition**

**Description of the intervention**

**How the intervention might work**

**Why it is important to do this review**

## **Objectives**

## **Methods**

**Criteria for considering studies for this review**

*Types of studies*

*Types of participants*

*Types of interventions*

*Types of outcome measures*

Primary outcomes

Secondary outcomes

**Search methods for identification of studies**

*Electronic searches*

*Searching other resources*

**Data collection and analysis**

*Selection of studies*

*Data extraction and management*

*Assessment of risk of bias in included studies*

*Measures of treatment effect*

*Unit of analysis issues*

*Dealing with missing data*

*Assessment of heterogeneity*

*Assessment of reporting biases*

*Data synthesis*

*Subgroup analysis and investigation of heterogeneity*

*Sensitivity analysis*

**Results**

**Description of studies**

*Results of the search*

*Included studies*

*Excluded studies*

## **Risk of bias in included studies**

*Allocation (selection bias)*

*Blinding (performance bias and detection bias)*

*Incomplete outcome data (attrition bias)*

*Selective reporting (reporting bias)*

*Other potential sources of bias*

**Effects of interventions**

## **Discussion**

**Summary of main results**

**Overall completeness and applicability of evidence**

**Quality of the evidence**

**Potential biases in the review process**

**Agreements and disagreements with other studies or reviews**

## **Authors' conclusions**

**Implications for practice**

**Implications for research**

## **Acknowledgements**

## **Contributions of authors**

## Declarations of interest

## Differences between protocol and review

## Published notes

## Characteristics of studies

### Characteristics of included studies

#### Goel 2005

|                      |                                                                                                                                                                                                                                                                                                                                                                                                                                                                                                                                                                                                                                                                                                                                                                                                                                                                                                                                                                                                                                                                                                                                                                                                                                                                                   |
|----------------------|-----------------------------------------------------------------------------------------------------------------------------------------------------------------------------------------------------------------------------------------------------------------------------------------------------------------------------------------------------------------------------------------------------------------------------------------------------------------------------------------------------------------------------------------------------------------------------------------------------------------------------------------------------------------------------------------------------------------------------------------------------------------------------------------------------------------------------------------------------------------------------------------------------------------------------------------------------------------------------------------------------------------------------------------------------------------------------------------------------------------------------------------------------------------------------------------------------------------------------------------------------------------------------------|
| <b>Methods</b>       | <b>Study design:</b> Randomized controlled trial<br><b>Study grouping:</b> Parallel group                                                                                                                                                                                                                                                                                                                                                                                                                                                                                                                                                                                                                                                                                                                                                                                                                                                                                                                                                                                                                                                                                                                                                                                         |
| <b>Participants</b>  | <b>Baseline Characteristics</b><br>Lysterapi<br>Lavdosis negativ iongenerator<br>Højdosis negativ iongenerator<br>Overall<br><b>Included criteria:</b> Major depression chronic (>2 years)<br><b>Excluded criteria:</b> Seasonal depression (baseret på seasonal pattern specifier in DSM-IV)Global Seasonality score > 6 (fra SPAQ)Andre akse 1 sygdomme i DSM-IVNyligt selvmordsforsøg Opvågning fra nattesøvn senere end klokken 9.00 eller sengetid senere end kl. 1 om natten Tidligere behandling med lys eller negative ionerBrug af psykotrope eller "recreative" stoffer andet end SSRI antidepressivaBrug af alkohol<br><b>Pretreatment:</b> No difference for depression severity between groups                                                                                                                                                                                                                                                                                                                                                                                                                                                                                                                                                                       |
| <b>Interventions</b> | <b>Intervention Characteristics</b><br>Lysterapi <ul style="list-style-type: none"> <li>● 10.000 lux i 32 cm afstand mellem lampe og øjne med 333 Kelvin farvetemperatur i 1 time daglig i 5 uger ved opvågning:</li> <li>● 1,7*10 (opløftet til 11) ioner per sekund i 32 cm afstand i 1 time i 5 uger ved opvågning:</li> <li>● 4,5*10 (opløftet til 14) ioner per sekund i 32 cm afstand i 1 time i 5 uger ved opvågning:</li> </ul> Lavdosis negativ iongenerator <ul style="list-style-type: none"> <li>● 10.000 lux i 32 cm afstand mellem lampe og øjne med 333 Kelvin farvetemperatur i 1 time daglig i 5 uger ved opvågning:</li> <li>● 1,7*10 (opløftet til 11) ioner per sekund i 32 cm afstand i 1 time i 5 uger ved opvågning:</li> <li>● 4,5*10 (opløftet til 14) ioner per sekund i 32 cm afstand i 1 time i 5 uger ved opvågning:</li> </ul> Højdosis negativ iongenerator <ul style="list-style-type: none"> <li>● 10.000 lux i 32 cm afstand mellem lampe og øjne med 333 Kelvin farvetemperatur i 1 time daglig i 5 uger ved opvågning:</li> <li>● 1,7*10 (opløftet til 11) ioner per sekund i 32 cm afstand i 1 time i 5 uger ved opvågning:</li> <li>● 4,5*10 (opløftet til 14) ioner per sekund i 32 cm afstand i 1 time i 5 uger ved opvågning:</li> </ul> |
| <b>Outcomes</b>      | <b>Structured Interview Guide for the Hamilton Depression Rating Scale (SIGH-SAD)</b> <ul style="list-style-type: none"> <li>● <b>Outcome type:</b> ContinuousOutcome</li> <li>● <b>Reporting:</b> Fully reported</li> <li>● <b>Scale:</b> SIGH-SAD</li> <li>● <b>Range:</b> Ikke angivet</li> <li>● <b>Unit of measure:</b> scores</li> <li>● <b>Direction:</b> Lower is better</li> <li>● <b>Data value:</b> Change from baseline</li> </ul> Remission                                                                                                                                                                                                                                                                                                                                                                                                                                                                                                                                                                                                                                                                                                                                                                                                                          |

|                       |                                                                                                                                                                                                                                                                                                                                                                                                                                                                                                                                                                                                                                                                                                                                                                                |
|-----------------------|--------------------------------------------------------------------------------------------------------------------------------------------------------------------------------------------------------------------------------------------------------------------------------------------------------------------------------------------------------------------------------------------------------------------------------------------------------------------------------------------------------------------------------------------------------------------------------------------------------------------------------------------------------------------------------------------------------------------------------------------------------------------------------|
|                       | <ul style="list-style-type: none"> <li>● <b>Outcome type:</b> DichotomousOutcome</li> <li>● <b>Reporting:</b> Fully reported</li> <li>● <b>Scale:</b> SIGH-SAD</li> <li>● <b>Unit of measure:</b> percent</li> <li>● <b>Direction:</b> Higher is better</li> <li>● <b>Data value:</b> Change from baseline</li> <li>● <b>Notes:</b> Score below or equal to 8 on the SIGH-SAD</li> </ul> <p><i>Drop-out</i></p> <ul style="list-style-type: none"> <li>● <b>Outcome type:</b> ContinuousOutcome</li> <li>● <b>Reporting:</b> Fully reported</li> <li>● <b>Scale:</b> None</li> <li>● <b>Range:</b> not relevant</li> <li>● <b>Direction:</b> Lower is better</li> <li>● <b>Data value:</b> Endpoint</li> <li>● <b>Notes:</b> Drop-out</li> </ul>                               |
| <b>Identification</b> | <p><b>Sponsorship source:</b> Research was supported by Grant MH42931 (to M.T.) from the U.S. National Institutes of Health and by a Wesleyan University Project Grant (to N.G.). Lighting apparatus was donated by Uplift Technologies Inc., Dartmouth, Nova Scotia, Canada.</p> <p><b>Country:</b> USA</p> <p><b>Setting:</b> New York State Psychiatric Institute (NYSPI) and the Department of Psychology, Wesleyan University</p> <p><b>Comments:</b> Outpatients</p> <p><b>Authors name:</b> Namni Goel</p> <p><b>Institution:</b> Department of Psychology, Wesleyan University, Middletown, CT, USA and New York State Psychiatric Institute, New York, NY, USA</p> <p><b>Email:</b> goel@pennmedicine.upenn.edu</p> <p><b>Address:</b> University of Pennsylvania</p> |
| <b>Notes</b>          | <p><i>Sune Straszek on 24/10/2019 03:46</i></p> <p><b>Select</b></p> <p>&gt;2 års depression, unipolare og en placebo kontrol?</p>                                                                                                                                                                                                                                                                                                                                                                                                                                                                                                                                                                                                                                             |

## Risk of bias table

| Bias                                                      | Authors' judgement | Support for judgement                                                                                                  |
|-----------------------------------------------------------|--------------------|------------------------------------------------------------------------------------------------------------------------|
| Random sequence generation (selection bias)               | Low risk           |                                                                                                                        |
| Allocation concealment (selection bias)                   | Low risk           |                                                                                                                        |
| Blinding of participants and personnel (performance bias) | High risk          | Patient not blinded to light but to placebo condition with a negative ion generator. Personnel blinding not mentioned. |
| Blinding of outcome assessment (detection bias)           | Low risk           |                                                                                                                        |
| Incomplete outcome data (attrition bias)                  | Low risk           |                                                                                                                        |
| Selective reporting (reporting bias)                      | Low risk           |                                                                                                                        |
| Other bias                                                | Low risk           |                                                                                                                        |

## Footnotes

**Characteristics of excluded studies*****Beauchemin 1997***

|                      |                          |
|----------------------|--------------------------|
| Reason for exclusion | Wrong patient population |
|----------------------|--------------------------|

***BLAND 2016***

|                      |                          |
|----------------------|--------------------------|
| Reason for exclusion | Wrong patient population |
|----------------------|--------------------------|

***Camardese 2015***

|                      |            |
|----------------------|------------|
| Reason for exclusion | Single arm |
|----------------------|------------|

***Chojnacka 2016***

|                      |                          |
|----------------------|--------------------------|
| Reason for exclusion | Wrong patient population |
|----------------------|--------------------------|

***Chojnacka 2016a***

|                      |                          |
|----------------------|--------------------------|
| Reason for exclusion | Wrong patient population |
|----------------------|--------------------------|

***ISRCTN11848158 2016***

|                      |                        |
|----------------------|------------------------|
| Reason for exclusion | Trial paper no results |
|----------------------|------------------------|

***Kripke 2011***

|                      |                          |
|----------------------|--------------------------|
| Reason for exclusion | Wrong patient population |
|----------------------|--------------------------|

***Lam 2016***

|                      |                          |
|----------------------|--------------------------|
| Reason for exclusion | Wrong patient population |
|----------------------|--------------------------|

***Levitt 1991***

|                      |            |
|----------------------|------------|
| Reason for exclusion | Single arm |
|----------------------|------------|

***Lieverse 2011***

|                      |                          |
|----------------------|--------------------------|
| Reason for exclusion | Wrong patient population |
|----------------------|--------------------------|

***Loving 2007***

|                      |            |
|----------------------|------------|
| Reason for exclusion | Commentary |
|----------------------|------------|

***Martiny 2004***

|                      |                          |
|----------------------|--------------------------|
| Reason for exclusion | Wrong patient population |
|----------------------|--------------------------|

***Martiny 2004a***

|                      |                          |
|----------------------|--------------------------|
| Reason for exclusion | Wrong patient population |
|----------------------|--------------------------|

***Martiny 2005***

|                      |                          |
|----------------------|--------------------------|
| Reason for exclusion | Wrong patient population |
|----------------------|--------------------------|

**Martiny 2005a**

|                      |                          |
|----------------------|--------------------------|
| Reason for exclusion | Wrong patient population |
|----------------------|--------------------------|

**Martiny 2006**

|                      |                          |
|----------------------|--------------------------|
| Reason for exclusion | Wrong patient population |
|----------------------|--------------------------|

**Martiny 2011**

|                      |            |
|----------------------|------------|
| Reason for exclusion | Commentary |
|----------------------|------------|

**Prasko 1995**

|                      |                        |
|----------------------|------------------------|
| Reason for exclusion | Trial paper no results |
|----------------------|------------------------|

**Prasko 1996**

|                      |                        |
|----------------------|------------------------|
| Reason for exclusion | Trial paper no results |
|----------------------|------------------------|

**Prasko 1999**

|                      |          |
|----------------------|----------|
| Reason for exclusion | Abstract |
|----------------------|----------|

**Wirtz Justice 2009**

|                      |          |
|----------------------|----------|
| Reason for exclusion | Abstract |
|----------------------|----------|

**WirzJustice 1999**

|                      |                    |
|----------------------|--------------------|
| Reason for exclusion | Wrong study design |
|----------------------|--------------------|

**Yamada 1995**

|                      |                          |
|----------------------|--------------------------|
| Reason for exclusion | Wrong patient population |
|----------------------|--------------------------|

**Young 2011**

|                      |          |
|----------------------|----------|
| Reason for exclusion | n of one |
|----------------------|----------|

Footnotes

**Characteristics of studies awaiting classification**

Footnotes

**Characteristics of ongoing studies**

Footnotes

**Summary of findings tables****Additional tables**



## References to studies

### Included studies

#### **Goel 2005**

Goel N.; Terman M.; Terman J.S.; Macchi M.M.; Stewart, J. W.. Controlled trial of bright light and negative air ions for chronic depression.. *Psychological medicine* 2005;35(7):945-955. [DOI: ]

### Excluded studies

#### **Beauchemin 1997**

Beauchemin K.M.; Hays, P.. Phototherapy is a useful adjunct in the treatment of depressed in- patients.. *Acta Psychiatrica Scandinavica* 1997;95(5):424-427. [DOI: ]

#### **BLAND 2016**

BLAND, PHILLIP. Light therapy effective for nonseasonal depression. *Practitioner* 2016;260(1790):8-8. [DOI: 10.1136/tobaccocontrol-2015-052705]

#### **Camardese 2015**

Camardese G.; Leone B.; Serrani R.; Walstra C.; Di Nicola M.; Marca G.D.; Bria P.; Janiri, L.. Augmentation of light therapy in difficult-to-treat depressed patients: An open-label trial in both unipolar and bipolar patients.. *Neuropsychiatric Disease and Treatment* 2015;11(Journal Article):2331-2338. [DOI: ]

#### **Chojnacka 2016**

Chojnacka, M.; Swiecicki, L.; Antosik-Wojcinska, A.Z.; Bzinkowska, D.; Borzym, A.; Antoniuk, D.; Bodzak-Opolska, G.; Sokol-Szawlowska, M.. A double blind, placebo controlled randomized trial of light therapy for non-seasonal bipolar vs. unipolar depression. *Neuropsychobiology* 2016;74(4):233-. [DOI: 10.1159/000477426]

#### **Chojnacka 2016a**

Chojnacka M.; AntosikWojcinska A.Z.; Dominiak M.; Bzinkowska D.; Borzym A.; SokolSzawlowska M.; BodzakOpolska G.; Antoniuk D.; Swiecicki, L.. A sham-controlled randomized trial of adjunctive light therapy for non-seasonal depression.. *Journal of affective disorders* 2016;203(Journal Article):1-8. [DOI: ]

#### **ISRCTN11848158 2016**

ISRCTN11848158,. Light therapy exploratory trial: investigating the effectiveness and feasibility of home use light therapy for the management of depression. 2016;(Journal Article). [DOI: ]

#### **Kripke 2011**

Kripke, D. F.. Bright light treatment reduces symptoms in older adults with non-seasonal major depression. *Evidence-based mental health* 2011;14(3):75. [DOI: 10.1136/ebmh.14.3.75 [doi]]

#### **Lam 2016**

Lam R.W.; Levitt A.J.; Levitan R.D.; Michalak E.E.; Cheung A.H.; Morehouse R.; Ramasubbu R.; Yatham L.N.; Tam, E. M.. Efficacy of bright light treatment, fluoxetine, and the combination in patients with nonseasonal major depressive disorder a randomized clinical trial.. *JAMA Psychiatry* 2016;73(1):56-63. [DOI: ]

#### **Levitt 1991**

Levitt A.J.; Joffe R.T.; Kennedy, S. H.. Bright light augmentation in antidepressant nonresponders.. *Journal of Clinical Psychiatry* 1991;52(8):336-337. [DOI: ]

#### **Lieverse 2011**

Lieverse R.; Van Someren E.J.W.; Nielen M.M.A.; Uitdehaag B.M.J.; Smit J.H.; Hoogendijk, W. J. G.. Bright light treatment in elderly patients with nonseasonal major depressive disorder: A randomized placebo-controlled trial.. *Archives of General Psychiatry* 2011;68(1):61-70. [DOI: ]

**Loving 2007**

Loving, R. T.. Benefits of bright light in non-seasonal major depression not sustained after discontinuation. Evidence Based Mental Health 2007;10(2):49-49. [DOI: ]

**Martiny 2004**

Martiny, Klaus. Adjunctive Bright Light in Non-Seasonal Major Depression.. Acta Psychiatrica Scandinavica 2004;110(Supl425):7-28. [DOI: ]

**Martiny 2004a**

Martiny, K.. Adjunctive bright light in non-seasonal major depression. Acta psychiatrica Scandinavica.Supplementum 2004;(425):7-28. doi(425):7-28. [DOI: ACP460\_2 [pii]]

**Martiny 2005**

Martiny K.; Lunde M.; Unden M.; Dam H.; Bech, P.. Adjunctive bright light in non-seasonal major depression: Results from clinician-rated depression scales.. Acta Psychiatrica Scandinavica 2005;112(2):117-125. [DOI: ]

**Martiny 2005a**

Martiny K.; Lunde M.; Unden M.; Dam H.; Bech, P.. Adjunctive bright light in non-seasonal major depression: Results from patient-reported symptom and well-being scales.. Acta Psychiatrica Scandinavica 2005;111(6):453-459. [DOI: ]

**Martiny 2006**

Martiny K.; Lunde M.; Unden M.; Dam H.; Bech, P.. The lack of sustained effect of bright light in non-seasonal major depression.. Psychological medicine 2006;36(9):1247-1252. [DOI: ]

**Martiny 2011**

Martiny, Klaus. Bright light treatment is effective in treating older patients with non-seasonal major depression. Evidence Based Nursing 2011;14(4):117-118. [DOI: 10.1136/ebn.2011.100036]

**Prasko 1995**

Prasko, J.; Baudis, P.; Klaschka, J.; Lestina, J.; Novotna, D.; Ondrakova, I.; Praskova, H.; Jiri, S.. Bright light therapy in patients with recurrent nonseasonal unipolar major depressive disorder - double blind study. 1995;(Journal Article):48. [DOI: ]

**Prasko 1996**

Prasko, J.; Baudis, P.; Lestina, J.; Novotná, D.; Jircaronina, K.; Ondrácková, I.. Double-blind study of bright light therapy and imipramine for major depressive disorder. 1996;(Journal Article). [DOI: ]

**Prasko 1999**

Prasko, J.; Ondrackova, I.; Praskova, H.; Jir, S.; Baudis, P.; Klaschka, J.; Lestina, J.; Novotná, D.. Light therapy in patients with nonseasonal major depressive disorders. 1999;Abstracts ume II(Journal Article):126. [DOI: ]

**Wirtz Justice 2009**

Wirtz-Justice, A.. Light therapy for nonseasonal depression. 2009;7(Journal Article):A3. [DOI: ]

**WirzJustice 1999**

WirzJustice A.; Graw P.; Roosli H.; Glauser G.; Fleischhauer, J.. An open trial of light therapy in hospitalised major depression.. Journal of affective disorders 1999;52(1-3):291-292. [DOI: ]

**Yamada 1995**

Yamada N.; MartinIverson M.T.; Daimon K.; Tsujimoto T.; Takahashi, S.. Clinical and chronobiological effects of light therapy on nonseasonal affective disorders.. Biological psychiatry 1995;37(12):866-873. [DOI: ]

**Young 2011**

Young, S. N.. Bright light for nonseasonal depression? Journal of psychiatry & neuroscience : JPN 2011;36(5):E37-8. [DOI: 10.1503/jpn.110056 [doi]]

## Studies awaiting classification

## Ongoing studies

## Other references

## Additional references

## Other published versions of this review

## Data and analyses

### 1 Light therapy versus placebo

| Outcome or Subgroup     | Studies | Participants | Statistical Method                        | Effect Estimate     |
|-------------------------|---------|--------------|-------------------------------------------|---------------------|
| 1.1 Depressive symptoms | 1       | 20           | Std. Mean Difference (IV, Random, 95% CI) | 1.27 [0.29, 2.25]   |
| 1.2 Remission           | 1       | 15           | Risk Ratio (IV, Random, 95% CI)           | 9.17 [0.52, 161.48] |

## Figures

Figure 1 (Analysis 1.1)

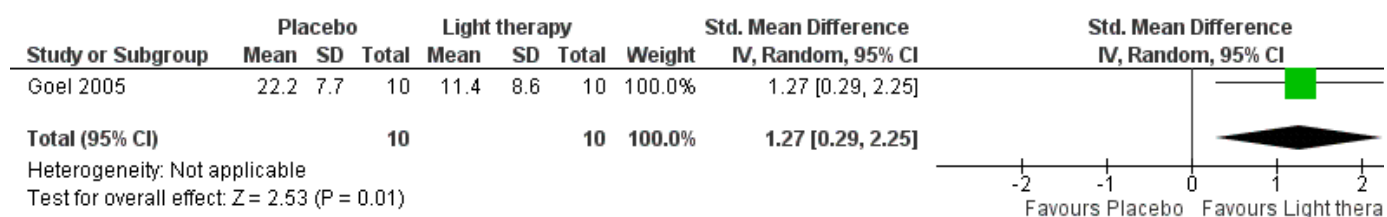

Forest plot of comparison: 5 Light therapy versus placebo, outcome: 5.1 Depressive symptoms.

Figure 2 (Analysis 1.2)

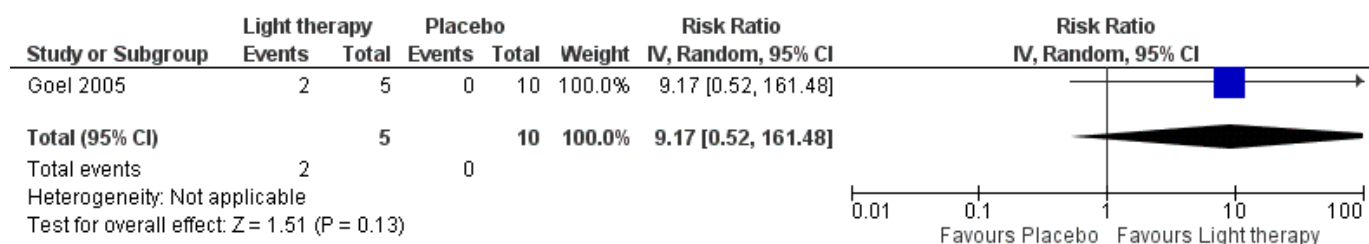

Forest plot of comparison: 5 Light therapy versus placebo, outcome: 5.2 Remission.

## Sources of support

### Internal sources

- No sources of support provided

### External sources

- No sources of support provided

## Feedback

## Appendices
