# Supplementary material
Source: publisher figshare collection journal article supplement (https://tandf.figshare.com/articles/dataset/_/16529476)
Supplement: Supplementary file 6 [file 2]

# Cognitive remediation for Treatment resistant depression

## Review information

### Authors

[Empty name]<sup>1</sup>

<sup>1</sup>[Empty affiliation]

Citation example: [Empty name]. Cognitive remediation for Treatment resistant depression. Cochrane Database of Systematic Reviews [Year], Issue [Issue].

### Contact person

[Empty name]

### Dates

Assessed as Up-to-date:

Date of Search:

Next Stage Expected:

Protocol First Published: Not specified

Review First Published: Not specified

Last Citation Issue: Not specified

### What's new

| Date / Event | Description |
|--------------|-------------|
|--------------|-------------|

### History

| Date / Event | Description |
|--------------|-------------|
|--------------|-------------|

## Abstract

### Background

### Objectives

### Search methods

### Selection criteria

### Data collection and analysis

### Main results

### Authors' conclusions

## Plain language summary

[Summary title]

[Summary text]

## Background

### Description of the condition

### Description of the intervention

How the intervention might work

Why it is important to do this review

## Objectives

## Methods

Criteria for considering studies for this review

*Types of studies*

*Types of participants*

*Types of interventions*

*Types of outcome measures*

Primary outcomes

Secondary outcomes

Search methods for identification of studies

*Electronic searches*

*Searching other resources*

Data collection and analysis

*Selection of studies*

*Data extraction and management*

*Assessment of risk of bias in included studies*

*Measures of treatment effect*

*Unit of analysis issues*

*Dealing with missing data*

*Assessment of heterogeneity*

*Assessment of reporting biases*

*Data synthesis*

---

*Subgroup analysis and investigation of heterogeneity*

*Sensitivity analysis*

## **Results**

Description of studies

*Results of the search*

*Included studies*

*Excluded studies*

Risk of bias in included studies

*Allocation (selection bias)*

*Blinding (performance bias and detection bias)*

*Incomplete outcome data (attrition bias)*

*Selective reporting (reporting bias)*

*Other potential sources of bias*

Effects of interventions

## **Discussion**

Summary of main results

Overall completeness and applicability of evidence

Quality of the evidence

Potential biases in the review process

Agreements and disagreements with other studies or reviews

## **Authors' conclusions**

Implications for practice

Implications for research

## **Acknowledgements**

## Contributions of authors

## Declarations of interest

## Differences between protocol and review

## Published notes

## Characteristics of studies

## Characteristics of included studies

## Bowie 2013

|                |                                                                                                                                                                                                                                                                                                                                                                                                                                                                                                                                                                                                                                                                                                                                                                                                                                                                                                                                                                                                                                                                                   |
|----------------|-----------------------------------------------------------------------------------------------------------------------------------------------------------------------------------------------------------------------------------------------------------------------------------------------------------------------------------------------------------------------------------------------------------------------------------------------------------------------------------------------------------------------------------------------------------------------------------------------------------------------------------------------------------------------------------------------------------------------------------------------------------------------------------------------------------------------------------------------------------------------------------------------------------------------------------------------------------------------------------------------------------------------------------------------------------------------------------|
| Methods        | <b>Study design:</b> Randomized controlled trial<br><b>Study grouping:</b> Parallel group<br><b>'intention to treat analysis' anvendt:</b>                                                                                                                                                                                                                                                                                                                                                                                                                                                                                                                                                                                                                                                                                                                                                                                                                                                                                                                                        |
| Participants   | <b>Baseline Characteristics</b><br>Cognitive remediation <ul style="list-style-type: none"> <li>● Age: 42.2 (SD=13.4)</li> <li>● Years of education: 13.8(2.6)</li> <li>● MADRS: 23.9(10)</li> <li>● Sex: 75% kvinder</li> </ul> Waiting list <ul style="list-style-type: none"> <li>● Age: 49.2 (SD=11.8)</li> <li>● Years of education: 14.6(2.6)</li> <li>● MADRS: 24.1(8.8)</li> <li>● Sex: 65% kvinder</li> </ul> Overall <ul style="list-style-type: none"> <li>● Age: ikke angivet</li> <li>● Years of education: ikke angivet</li> <li>● MADRS: ikke angivet</li> <li>● Sex: ikke angivet</li> </ul> <b>Included criteria:</b> a diagnosis of MDD and treatment resistant<br><b>Excluded criteria:</b> - medical diagnosis associated with neurocognitive impairment; - a reading level lower than grade 6, as assessed by the Wide Range Achievement Test Y Reading Recognition subtest (Wilkinson, 1993); - uncorrectable sensory/perceptual conditions<br><b>Pretreatment:</b> No difference in age, sex and years of education or baseline MADRS score between groups |
| Interventions  | <b>Intervention Characteristics</b><br>Cognitive remediation <ul style="list-style-type: none"> <li>● antal a sessioner i alt: 10</li> <li>● varighed af enkelt session: 90 minutter</li> <li>● hyppighed af sessioner: engang ugentligt</li> <li>● hjemmeopgave: Ja</li> </ul> Waiting list <ul style="list-style-type: none"> <li>● antal a sessioner i alt: ikke relevant</li> <li>● varighed af enkelt session: ikke relevant</li> <li>● hyppighed af sessioner: ikke relevant</li> <li>● hjemmeopgave: ikke relevant</li> </ul>                                                                                                                                                                                                                                                                                                                                                                                                                                                                                                                                              |
| Outcomes       | <b>Funktionsniveau efter endt behandling</b> <ul style="list-style-type: none"> <li>● <b>Outcome type:</b> Continuous Outcome</li> <li>● <b>Reporting:</b> Fully reported</li> <li>● <b>Scale:</b> The LIFE-RIFT</li> <li>● <b>Range:</b> ikke angivet</li> <li>● <b>Unit of measure:</b> points</li> <li>● <b>Direction:</b> Lower is better</li> <li>● <b>Data value:</b> Change from baseline</li> <li>● <b>Notes:</b> The LIFE-RIFT (The Longitudinal Interval Follow-up Evaluation Range of Impaired Functioning Tool) er semi-struktureret patient interview, som vurderer funktionsniveauet i 4 domæner: arbejde, interpersonale relationer, 'general life satisfaction', og 'recreation'. Højere score betyder sværere impairment.</li> </ul>                                                                                                                                                                                                                                                                                                                             |
| Identification | <b>Sponsorship source:</b> Funds for this study were provided to Dr Bowie by Queen's University, a Leader's Opportunity Award from the Canadian Foundation for Research and Innovation, and an Early Researcher Award from the Ontario Ministry of Research and Innovation. Scientific Brain Training Pro provided the software for the cognitive exercises at no cost. None of these agencies had a role in the planning or the designing of the study or in the preparation or decision to submit the manuscript for publication. The authors declare no conflict of interest                                                                                                                                                                                                                                                                                                                                                                                                                                                                                                   |

|              |                                                                                                                                                                                                                                                                                                                                                                                                                                                                                                                                                                                                                                                                                                                                                                                                        |
|--------------|--------------------------------------------------------------------------------------------------------------------------------------------------------------------------------------------------------------------------------------------------------------------------------------------------------------------------------------------------------------------------------------------------------------------------------------------------------------------------------------------------------------------------------------------------------------------------------------------------------------------------------------------------------------------------------------------------------------------------------------------------------------------------------------------------------|
|              | <b>Country:</b> Canada<br><b>Setting:</b> 'a tertiary clinic', hvor patienter fik sin behandling for MDD<br><b>Comments:</b><br><b>Authors name:</b> Bowie et al.<br><b>Institution:</b> Department of Psychology, Queen's University, Kingston, Ontario, Canada.<br><b>Email:</b> bowiec@queensu.ca<br><b>Address:</b> R. Bowie, PhD, Department of Psychology, Queen's University, 62 Arch St, Kingston, Ontario, Canada, K7N 3N6.                                                                                                                                                                                                                                                                                                                                                                   |
| <b>Notes</b> | <p><i>NKR pulje 15 Svært behandlige depressioner</i> on 29/09/2019 17:07</p> <p><b>Select</b><br/> Population: kun ældre patienter, forfatterne beskriver ikke TRD status, de konstaterer bare, at patienterne er TRD;<br/> Intervention: 1,5 time ugentligt, vores krav er minimum 2 timer ugentligt, derudover er spørgsmålet, om deres intervention indholdsmæssigt svarer til det, vores PICO-6 kræver. Jeg har inkluderet, men studiet er på grænsen, så jeg vil ikke protestere, hvis d. 2. reviewer vil ekskludere.</p> <p><i>NKR pulje 15 Svært behandlige depressioner</i> on 09/11/2019 19:07</p> <p><b>Outcomes</b><br/> Studiet rapporterer resultater for 'Kognitiv funktionsniveau' outcome. Disse resultater er beskrevet narrativt direkte i Kognitiv remediering evidensprofilen.</p> |

## Risk of bias table

| Bias                                                      | Authors' judgement | Support for judgement                                                                                            |
|-----------------------------------------------------------|--------------------|------------------------------------------------------------------------------------------------------------------|
| Random sequence generation (selection bias)               | Low risk           |                                                                                                                  |
| Allocation concealment (selection bias)                   | Unclear risk       |                                                                                                                  |
| Blinding of participants and personnel (performance bias) | High risk          | Judgement Comment: Muligvis udført, men ikke klart, om det er nok for at blinde personalet, og special deltagere |
| Blinding of outcome assessment (detection bias)           | Low risk           | Judgement Comment: Muligvis udført, men det er ikke klart, om det var nok for at blinde assessors                |
| Incomplete outcome data (attrition bias)                  | Low risk           | Judgement Comment: Stor frafald                                                                                  |
| Selective reporting (reporting bias)                      | High risk          |                                                                                                                  |

Footnotes

## Characteristics of excluded studies

*Ekkers 2011*

|                      |                          |
|----------------------|--------------------------|
| Reason for exclusion | Wrong patient population |
|----------------------|--------------------------|

*Morimoto 2014*

|                      |                  |
|----------------------|------------------|
| Reason for exclusion | Wrong comparator |
|----------------------|------------------|

*Trapp 2016*

|                      |                          |
|----------------------|--------------------------|
| Reason for exclusion | Wrong patient population |
|----------------------|--------------------------|

Footnotes

## Characteristics of studies awaiting classification

Footnotes

## Characteristics of ongoing studies

Footnotes

## Summary of findings tables

## Additional tables

## References to studies

## Included studies

*Bowie 2013*

Bowie C.R.; Gupta M.; Holshausen K.; Jokic R.; Best M.; Milev, R.. Cognitive remediation for treatment-resistant depression: Effects on cognition and functioning and the role of online homework.. Journal of Nervous and Mental Disease 2013;201(8):680-685. [DOI: ]

## Excluded studies

### Ekkers 2011

Ekkers, Wilfried; Korrelboom, Kees; Huijbrechts, Irma; Smits, Niels; Cuijpers, Pim; van der Gaag, Mark. Competitive Memory Training for treating depression and rumination in depressed older adults: A randomized controlled trial.. Behaviour research and therapy 2011;49(10):588-596. [DOI: ]

### Morimoto 2014

Morimoto S.S.; Wexler B.E.; Liu J.; Hu W.; Seirup J.; Alexopoulos, G. S.. Neuroplasticity-based computerized cognitive remediation for treatment-resistant geriatric depression.. Nature Communications 2014;5(pagination):Arte Number: 4579. ate of Pubaton: 05 Aug 2014. [DOI: ]

### Trapp 2016

Trapp W.; Engel S.; Hajak G.; Lautenbacher S.; Gallhofer, B.. Cognitive remediation for depressed inpatients: Results of a pilot randomized controlled trial.. Australian and New Zealand Journal of Psychiatry 2016;50(1):46-55. [DOI: ]

## Studies awaiting classification

## Ongoing studies

## Other references

## Additional references

## Other published versions of this review

## Data and analyses

### 1 Cognitive remediation vs Waiting list

| Outcome or Subgroup                                    | Studies | Participants | Statistical Method                        | Effect Estimate     |
|--------------------------------------------------------|---------|--------------|-------------------------------------------|---------------------|
| 1.1 Funktionsniveau (impairment) efter endt behandling | 1       | 33           | Std. Mean Difference (IV, Random, 95% CI) | -0.12 [-0.80, 0.56] |

## Figures

Figure 1 (Analysis 1.1)

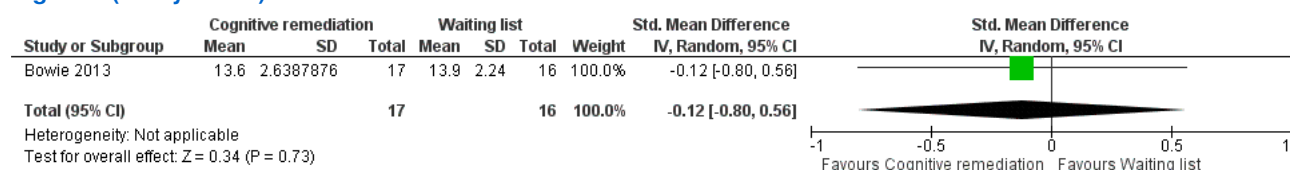

Forest plot of comparison: 1 Cognitive remediation vs Waiting list, outcome: 1.1 Funktionsniveau (impairment) efter endt behandling.

## Sources of support

### Internal sources

- No sources of support provided

### External sources

- No sources of support provided

## Feedback

## Appendices
